# Supplementary material for: Palladium-catalyzed allylic alkylation of hydrazones with hydroxy-tethered allyl carbonates: synthesis of functionalized hydrazones
Source: Royal Society of Chemistry journal article supplement (doi:10.1039/d2qo01186g), 2022-01-01
Supplement: d2qo01186g1.pdf [file d2qo01186g1.pdf]

## Electronic Supplementary Information

# Palladium-Catalyzed Allylic Alkylation of Hydrazones with Hydroxy-Tethered Allyl Carbonates: Synthesis of Functionalized Hydrazones

Jiaqing Xu,<sup>a</sup> Min Liu,<sup>a</sup> Yimin Hu,<sup>a</sup> Lei Wang,<sup>b</sup> Wei Wang,<sup>c</sup> Yongjun Wu,<sup>c</sup> Hongchao Guo<sup>a\*</sup>

<sup>a</sup> Department of Chemistry and Innovation Center of Pesticide Research, China Agricultural University, Beijing 100193, P. R. China. E-mail: hchguo@cau.edu.cn

<sup>b</sup> Nutrichem Co., LTD

<sup>c</sup> College of Public Health, Zhengzhou University, Zhengzhou 450001, P. R. China

## Contents

|                                                                                                                          |     |
|--------------------------------------------------------------------------------------------------------------------------|-----|
| 1. General Information                                                                                                   | S2  |
| 2. Preparation of Substrates                                                                                             | S2  |
| 3. Experiment section                                                                                                    | S3  |
| 4. Characterization Data of the Compounds <b>3</b> , <b>4</b> , <b>5</b> , <b>6</b> , <b>8</b> , <b>10</b> and <b>12</b> | S5  |
| 5. <sup>1</sup> H, <sup>13</sup> C and <sup>19</sup> F NMR Spectra of All Products                                       | S21 |
| 6. X-Ray Crystallographic Data of <b>3aq</b> and <b>4a</b>                                                               | S63 |

## 1. General Information

All reactions were performed under Ar atmospheres in oven-dried glassware with magnetic stirring. Unless otherwise stated, all reagents were purchased from commercial suppliers and used without further purification. All solvents were purified and dried according to standard methods prior to use. Organic solutions were concentrated under reduced pressure on a rotary evaporator or an oil pump. Reactions were monitored through thin layer chromatography (TLC) on silica gel–precoated glass plates. Chromatograms were visualized by fluorescence quenching with UV light at 254 nm. Flash column chromatography was performed using Qingdao Haiyang flash silica gel (200–300 mesh). Infrared spectra were recorded using a Bruker Optics TENSOR 27 instrument.  $^1\text{H}$ ,  $^{13}\text{C}$  and  $^{19}\text{F}$  NMR spectra were recorded in  $\text{CDCl}_3$  using a 500 MHz NMR instrument (referenced internally to  $\text{Me}_4\text{Si}$ ).  $^1\text{H}$  NMR data are reported as follows: chemical shift, multiplicity (s = singlet; d = doublet; q = quartet; m = multiplet; br = broad), coupling constant (Hz), and integral. Data for  $^{13}\text{C}$  NMR spectra are reported in terms of chemical shift. Melting points were determined by an X-4 digital micro melting point apparatus. X-ray crystallographic data were collected using a Bruker D8 venture.

## 2. Preparation of Substrates

The hydroxy-tethered allylic carbonate **1**<sup>[1]</sup>, 2-(2-Phenylhydrazine phenylene) ethyl acetates **2**<sup>[2]</sup>, N'-benzylidene-4-methylbenzene-sulfonylhydrazides **9**<sup>[2]</sup> and 2-Methylidenetrimethylene carbonate **7**<sup>[3]</sup> were synthesized using known literature procedures.

## 3. Experiment section

### General Procedure for Palladium-Catalyzed C(sp<sup>2</sup>)-H Allylic Alkylations

Under argon atmosphere, to a mixture of 2-methylidenetrimethylene carbonate **1** (0.15 mmol),

---

[1] Xu, J.; Shi, W.; Liu, M.; Liao, J.; Wang, W.; Wu, Y.; Guo, H. *Adv. Synth. Catal.* **2022**, *364*, 2060.

[2] Zhu, J.-N.; Wang, W.-K.; Jin, Z.-H.; Wang, Q.-K.; Zhao, S.-Y. *Org. Lett.* **2019**, *21*, 5046.

[3] R. Shintani, K. Moriya, T. Hayashi, *Chem. Commun.* **2011**, *47*, 3057.

hydrazones **2** (0.10 mmol) and catalyst Pd<sub>2</sub>(dba)<sub>3</sub>•CHCl<sub>3</sub> (2.5 mol%) /DpePhos (10.0 mol%) in a Schlenk tube, 2 mL of solvent was added at room temperature. The resulting mixture was stirred for 48 h and then was concentrated to dryness. The residue was purified through flash column chromatography to afford the corresponding allylic alkylation products **3**.

#### **General Procedure for Further Cyclization**

The allylation product **3** (0.2 mmol) and triethylamine (0.4 mmol) were dissolved in 3 mL of tetrahydrofuran in turn. The resulting solution was cooled to 0 °C, and NaH (0.3 mmol) was slowly added. The mixture was stirred at room temperature for 1 h, and then TsCl (0.4 mmol) was added into the reaction system. The resulting mixture was stirred at room temperature for 24 h, and then was concentrated to dryness. The residue was purified through flash column chromatography to afford the cyclization products **4**.

#### **Further Transformation of 3aa**

The allylic alkylation product **3aa** (0.1 mmol) was dissolved in 2 mL of CH<sub>2</sub>Cl<sub>2</sub>. Et<sub>3</sub>N (0.2 mmol) and benzoyl chloride (0.2 mmol) were then added into the solution at 0 °C. The resulting mixture was warmed to room temperature and stirred for 12 h (monitored by TLC). The mixture was then concentrated to dryness. The residue was purified through flash column chromatography to afford the product **5**.

#### **Allylic Alkylation Between 2-Methylidenetrimethylene Carbonate **7** and **2a****

Under argon atmosphere, to a mixture of 2-methylidenetrimethylene carbonate **7** (0.15 mmol), hydrazones **2a** (0.10 mmol) and catalyst Pd<sub>2</sub>(dba)<sub>3</sub>•CHCl<sub>3</sub> (2.5 mol%) / BINAP (10.0 mol%) in a Schlenk tube, 2 mL of CH<sub>2</sub>Cl<sub>2</sub> was added at room temperature. The resulting mixture was stirred until the starting material was completely consumed (monitored by TLC) and then was concentrated to dryness. The residue was purified through flash column chromatography to afford the corresponding allylic alkylation products **8**.

### Scheme S1. Control Experiment with Hydrazone **2a** for Exploration on Mechanism

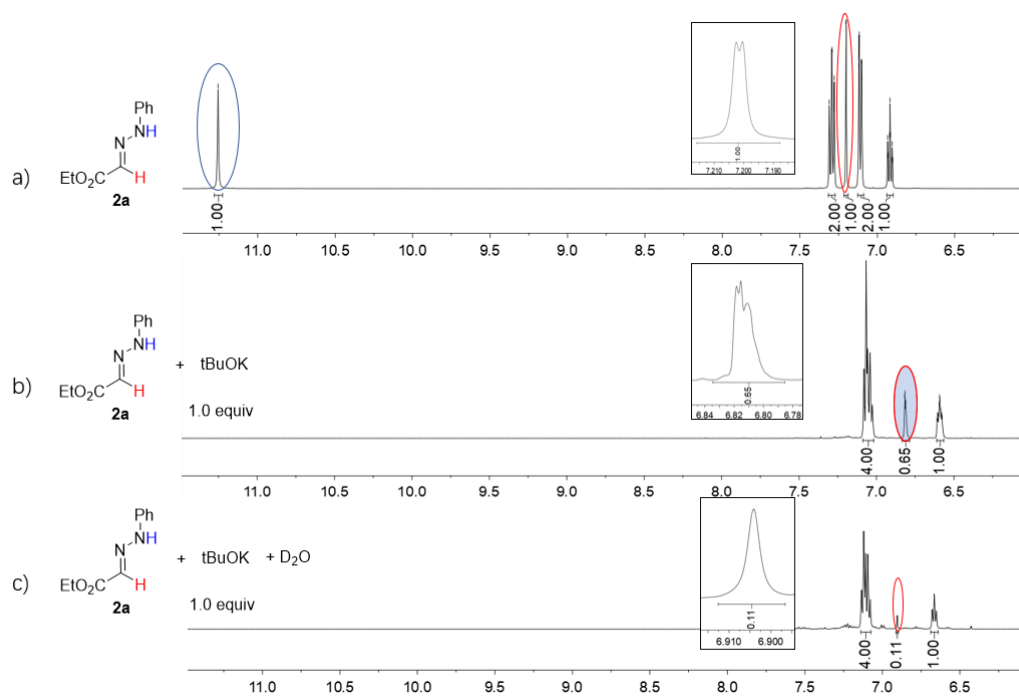

<sup>1</sup>H spectra were recorded in DMSO-*d*<sub>6</sub> using a 500 MHz NMR instrument (referenced internally to Me<sub>4</sub>Si): a) Pure hydrazone **2a** (2.0 mmol); b) 2.0 mmol hydrazone **2a** with *t*BuOK (1.0 equiv.); c) 2.0 mmol of hydrazone **2a** and *t*BuOK (1.0 equiv.) with two drops of D<sub>2</sub>O.

#### 4. Characterization Data of the Compounds 3, 4, 5, 6, 8 and 10

##### Ethyl (E)-4-(hydroxy(phenyl)methyl)-2-(2-phenylhydrazineylidene)pent-4-enoate (3aa)

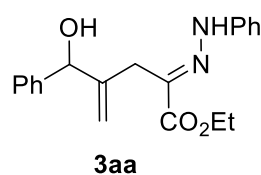

Prepared according to the general procedure as described above in 93% yield (31.4 mg). It was purified by flash chromatography (6.7 – 10.0% EtOAc/PE) to afford a colorless oil.  $^1\text{H}$  NMR (500 MHz,  $\text{CDCl}_3$ )  $\delta$  8.57 (s, 1H), 7.45 – 7.40 (m, 2H), 7.39 (t,  $J = 7.6$  Hz, 3H), 7.37 – 7.30 (m, 1H), 7.27 (d,  $J = 9.9$  Hz, 3H), 7.09 (d,  $J = 7.2$  Hz, 2H), 6.94 (t,  $J = 7.4$  Hz, 1H), 5.34 (d,  $J = 3.3$  Hz, 1H), 5.16 (s, 1H), 4.99 (s, 1H), 4.29 (q,  $J = 7.1$  Hz, 2H), 3.28 (q,  $J = 16.6$  Hz, 2H), 2.82 (d,  $J = 3.3$  Hz, 1H), 1.35 (t,  $J = 7.1$  Hz, 3H);  $^{13}\text{C}$  NMR (126 MHz,  $\text{CDCl}_3$ )  $\delta$  165.7, 144.5, 143.3, 141.1, 133.0, 129.2, 128.7, 128.1, 126.1, 121.9, 114.1, 114.0, 77.7, 61.3, 26.5, 14.3; IR (film)  $\nu_{\text{max}}$  3428, 3254, 2980, 1698, 1604, 1566, 1496, 1242, 1192, 1169, 1098  $\text{cm}^{-1}$ ; HRMS (ESI) calcd for  $\text{C}_{20}\text{H}_{23}\text{N}_2\text{O}_3^+ [\text{M}+\text{H}]^+$  339.1703; Found 339.1701.

##### Ethyl (E)-4-((4-fluorophenyl)(hydroxy)methyl)-2-(2-phenylhydrazineylidene)pent-4-enoate (3ba)

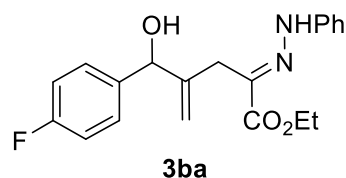

Prepared according to the general procedure as described above in 49% yield (17.5 mg). It was purified by flash chromatography (6.7 – 10.0% EtOAc/PE) to afford a white solid. mp = 89 – 91  $^\circ\text{C}$ ;  $^1\text{H}$  NMR (500 MHz,  $\text{CDCl}_3$ )  $\delta$  8.64 (s, 1H), 7.41 – 7.34 (m, 2H), 7.30 – 7.24 (m, 2H), 7.13 – 7.08 (m, 2H), 7.09 – 7.02 (m, 2H), 6.98 – 6.92 (m, 1H), 5.31 (d,  $J = 3.5$  Hz, 1H), 5.12 (s, 1H), 5.02 (s, 1H), 4.28 (q,  $J = 7.1$  Hz, 2H), 3.30 (q,  $J = 16.5$  Hz, 2H), 2.96 (d,  $J = 3.6$  Hz, 1H), 1.35 (t,  $J = 7.1$  Hz, 3H);  $^{13}\text{C}$  NMR (126 MHz,  $\text{CDCl}_3$ )  $\delta$  165.7, 162.5 (C-F,  $^1J_{\text{C-F}} = 246.5$  Hz), 144.7, 143.2, 136.80, 136.77, 132.9, 129.3, 127.9, 127.8, 122.0, 115.5 (C-F,  $^2J_{\text{C-F}} = 21.5$  Hz), 114.6, 114.0, 77.0, 61.4, 26.7, 14.3;  $^{19}\text{F}$  NMR (471 MHz,  $\text{CDCl}_3$ )  $\delta$  -114.23; IR (film)  $\nu_{\text{max}}$  3420, 3255, 2926, 1698, 1604, 1567, 1498, 1242, 1193, 1170, 1098  $\text{cm}^{-1}$ ; HRMS (ESI) calcd for  $\text{C}_{20}\text{H}_{22}\text{FN}_2\text{O}_3^+ [\text{M}+\text{H}]^+$  357.1609; Found 357.1604.

##### Ethyl (E)-4-((4-chlorophenyl)(hydroxy)methyl)-2-(2-phenylhydrazineylidene)pent-4-enoate (3ca)

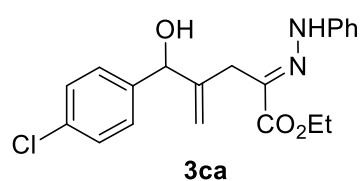

Prepared according to the general procedure as described above in 71% yield (26.5 mg). It was purified by flash chromatography (6.7 – 10.0% EtOAc/PE) to afford a yellow solid. mp = 103 – 105  $^\circ\text{C}$ ;  $^1\text{H}$  NMR (500 MHz,  $\text{CDCl}_3$ )  $\delta$  8.62 (s, 1H), 7.34 (s, 4H), 7.27 (s, 2H), 7.25 (d,  $J = 2.2$  Hz, 2H), 7.10 (d,  $J = 7.5$  Hz, 2H), 6.95 (t,  $J = 7.4$  Hz, 1H), 5.30 (d,  $J = 3.5$  Hz, 1H), 5.11 (s, 1H), 5.01 (s, 1H), 4.28 (q,  $J = 7.1$  Hz, 2H), 3.25 (q,  $J = 4.6$  Hz, 2H), 3.09 (d,  $J = 3.7$  Hz, 1H), 1.35 (t,  $J = 7.1$  Hz, 3H);  $^{13}\text{C}$  NMR (126 MHz,  $\text{CDCl}_3$ )  $\delta$  165.8, 144.5, 143.2, 139.5, 133.8, 132.8, 129.3, 128.7, 127.5, 122.1, 114.8, 114.0, 77.0, 61.4, 26.5, 14.3; IR (film)  $\nu_{\text{max}}$  3420, 3257, 2925, 1698, 1604, 1567, 1497, 1243, 1194, 1169, 1097  $\text{cm}^{-1}$ ; HRMS (ESI) calcd for  $\text{C}_{20}\text{H}_{22}\text{ClN}_2\text{O}_3^+ [\text{M}+\text{H}]^+$  373.1313; Found 373.1306.

**Ethyl (E)-4-((2-bromophenyl)(hydroxy)methyl)-2-(2-phenylhydrazineylidene)pent-4-enoate (3da)**

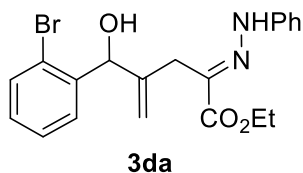

Prepared according to the general procedure as described above in 35% yield (14.7 mg). It was purified by flash chromatography (6.7 – 10.0% EtOAc/PE) to afford a white solid. mp = 82 – 84 °C; <sup>1</sup>H NMR (500 MHz, CDCl<sub>3</sub>) δ 8.67 (s, 1H), 7.66 (d, *J* = 7.7 Hz, 1H), 7.56 (d, *J* = 7.9 Hz, 1H), 7.39 (t, *J* = 7.5 Hz, 1H), 7.28 (t, *J* = 7.9 Hz, 2H), 7.22 – 7.18 (m, 1H), 7.16 (d, *J* = 8.0 Hz, 2H), 6.96 (t, *J* = 7.3 Hz, 1H), 5.61 (d, *J* = 3.8 Hz, 1H), 5.04 (s, 1H), 4.98 (s, 1H), 4.31 (q, *J* = 7.1 Hz, 2H), 3.52 (d, *J* = 16.7 Hz, 1H), 3.35 (d, *J* = 16.6 Hz, 1H), 2.95 (d, *J* = 4.0 Hz, 1H), 1.37 (t, *J* = 7.1 Hz, 3H); <sup>13</sup>C NMR (126 MHz, CDCl<sub>3</sub>) δ 165.8, 143.3, 142.4, 140.1, 133.0, 132.9, 129.5, 129.3, 128.2, 127.8, 122.8, 122.0, 115.6, 114.0, 75.8, 61.4, 28.0, 14.4; IR (film)  $\nu_{\max}$  3419, 3254, 2980, 1698, 1603, 1552, 1495, 1240, 1194, 1167, 1096 cm<sup>-1</sup>; HRMS (ESI) calcd for C<sub>20</sub>H<sub>22</sub>BrN<sub>2</sub>O<sub>3</sub><sup>+</sup> [M+H]<sup>+</sup> 417.0808; Found 417.0802.

**Ethyl (E)-4-((3-bromophenyl)(hydroxy)methyl)-2-(2-phenylhydrazineylidene)pent-4-enoate (3ea)**

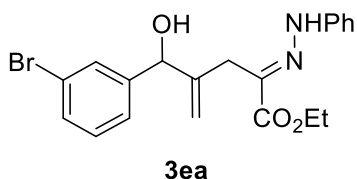

Prepared according to the general procedure as described above in 73% yield (30.4 mg). It was purified by flash chromatography (6.7 – 10.0% EtOAc/PE) to afford a white solid. mp = 105 – 107 °C; <sup>1</sup>H NMR (500 MHz, CDCl<sub>3</sub>) δ 8.61 (s, 1H), 7.58 (s, 1H), 7.44 (d, *J* = 7.7 Hz, 1H), 7.32 (d, *J* = 7.7 Hz, 1H), 7.29 – 7.25 (m, 2H), 7.22 (t, *J* = 7.8 Hz, 1H), 7.12 (d, *J* = 7.9 Hz, 2H), 6.95 (t, *J* = 7.4 Hz, 1H), 5.29 (d, *J* = 3.6 Hz, 1H), 5.14 (s, 1H), 5.02 (s, 1H), 4.28 (q, *J* = 7.1 Hz, 2H), 3.25 (q, *J* = 16.6 Hz, 2H), 3.20 (d, *J* = 3.9 Hz, 1H), 1.35 (t, *J* = 7.1 Hz, 3H); <sup>13</sup>C NMR (126 MHz, CDCl<sub>3</sub>) δ 165.8, 144.2, 143.5, 143.2, 132.7, 131.1, 130.2, 129.3, 129.1, 124.7, 122.8, 122.1, 115.0, 114.0, 77.0, 61.4, 26.4, 14.3; IR (film)  $\nu_{\max}$  3420, 3256, 2980, 1698, 1604, 1568, 1497, 1243, 1192, 1170, 1098 cm<sup>-1</sup>; HRMS (ESI) calcd for C<sub>20</sub>H<sub>22</sub>BrN<sub>2</sub>O<sub>3</sub><sup>+</sup> [M+H]<sup>+</sup> 417.0808; Found 417.0804.

**Ethyl (E)-4-((4-bromophenyl)(hydroxy)methyl)-2-(2-phenylhydrazineylidene)pent-4-enoate (3fa)**

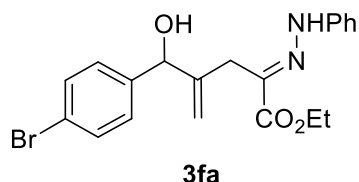

Prepared according to the general procedure as described above in 80% yield (33.4 mg). It was purified by flash chromatography (6.7 – 10.0% EtOAc/PE) to afford a white solid. mp = 119 – 121 °C; <sup>1</sup>H NMR (500 MHz, CDCl<sub>3</sub>) δ 8.59 (s, 1H), 7.49 (d, *J* = 8.4 Hz, 2H), 7.28 (dd, *J* = 8.0, 2.9 Hz, 3H), 7.26 (s, 1H), 7.11 – 7.07 (m, 2H), 6.95 (t, *J* = 7.3 Hz, 1H), 5.29 (d, *J* = 3.5 Hz, 1H), 5.11 (s, 1H), 5.01 (s, 1H), 4.28 (q, *J* = 7.1 Hz, 2H), 3.25 (q, *J* = 16.5 Hz, 2H), 3.06 (d, *J* = 3.6 Hz, 1H), 1.35 (t, *J* = 7.1 Hz, 3H); <sup>13</sup>C NMR (126 MHz, CDCl<sub>3</sub>) δ 165.7, 144.4, 143.2, 140.1, 132.8, 131.7, 129.3, 127.9, 122.1, 122.0, 114.8, 114.0, 61.4, 26.4, 14.3; IR (film)  $\nu_{\max}$  3420, 3257, 2926, 1698, 1604, 1559, 1497, 1243, 1194, 1169, 1099 cm<sup>-1</sup>; HRMS (ESI) calcd for C<sub>20</sub>H<sub>22</sub>BrN<sub>2</sub>O<sub>3</sub><sup>+</sup> [M+H]<sup>+</sup> 417.0808; Found 417.0802.

### Ethyl (E)-4-(hydroxy(o-tolyl)methyl)-2-(2-phenylhydrazineylidene)pent-4-enoate (3ga)

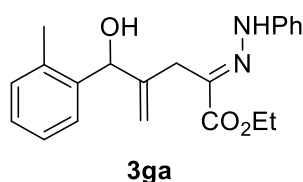

Prepared according to the general procedure as described above in 81% yield (28.7 mg). It was purified by flash chromatography (6.7 – 10.0% EtOAc/PE) to afford a yellow solid. mp = 88 – 90 °C; <sup>1</sup>H NMR (500 MHz, CDCl<sub>3</sub>) δ 8.83 (s, 1H), 7.57 (dd, *J* = 7.5, 1.8 Hz, 1H), 7.28 – 7.22 (m, 4H), 7.17 – 7.12 (m, 3H), 6.96 – 6.92 (m, 1H), 5.45 (d, *J* = 3.4 Hz, 1H), 5.00 (s, 1H), 4.96 (s, 1H), 4.29 (q, *J* = 7.1 Hz, 2H), 3.40 (d, *J* = 16.4 Hz, 1H), 3.27 (d, *J* = 16.4 Hz, 1H), 2.77 (d, *J* = 3.4 Hz, 1H), 2.26 (s, 3H), 1.35 (t, *J* = 7.1 Hz, 3H); <sup>13</sup>C NMR (126 MHz, CDCl<sub>3</sub>) δ 165.8, 143.4, 143.2, 139.0, 135.5, 133.2, 130.7, 129.2, 128.0, 126.4, 125.7, 121.9, 114.8, 114.0, 74.4, 61.3, 27.2, 19.2, 14.4; IR (film)  $\nu_{\max}$  3421, 3254, 2926, 1698, 1604, 1568, 1497, 1244, 1193, 1169, 1098 cm<sup>-1</sup>; HRMS (ESI) calcd for C<sub>21</sub>H<sub>25</sub>N<sub>2</sub>O<sub>3</sub><sup>+</sup> [M+H]<sup>+</sup> 353.1860; Found 353.1856.

### Ethyl (E)-4-(hydroxy(m-tolyl)methyl)-2-(2-phenylhydrazineylidene)pent-4-enoate (3ha)

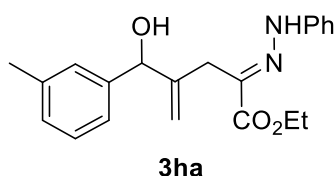

Prepared according to the general procedure as described above in 82% yield (28.7 mg). It was purified by flash chromatography (6.7 – 10.0% EtOAc/PE) to afford a yellow oil. <sup>1</sup>H NMR (500 MHz, CDCl<sub>3</sub>) δ 8.51 (s, 1H), 7.31 – 7.25 (m, 3H), 7.28 – 7.24 (m, 3H), 7.23 (d, *J* = 7.1 Hz, 4H), 7.14 (d, *J* = 7.4 Hz, 1H), 7.10 – 7.04 (m, 2H), 6.93 (t, *J* = 7.4 Hz, 1H), 5.29 (s, 1H), 5.18 (s, 1H), 4.99 (s, 1H), 4.29 (q, *J* = 7.1 Hz, 2H), 3.26 (q, *J* = 16.6 Hz, 2H), 2.73 (d, *J* = 3.2 Hz, 1H), 2.35 (s, 3H), 1.35 (t, *J* = 7.1 Hz, 3H); <sup>13</sup>C NMR (126 MHz, CDCl<sub>3</sub>) δ 165.7, 144.6, 143.3, 141.1, 138.4, 133.1, 129.2, 128.9, 128.6, 126.8, 123.1, 121.9, 114.0, 113.9, 77.7, 61.3, 26.6, 21.5, 14.34; IR (film)  $\nu_{\max}$  3421, 3255, 2918, 1698, 1604, 1569, 1497, 1243, 1192, 1169, 1099 cm<sup>-1</sup>; HRMS (ESI) calcd for C<sub>21</sub>H<sub>25</sub>N<sub>2</sub>O<sub>3</sub><sup>+</sup> [M+H]<sup>+</sup> 353.1860; Found 353.1854.

### Ethyl (E)-4-(hydroxy(p-tolyl)methyl)-2-(2-phenylhydrazineylidene)pent-4-enoate (3ia)

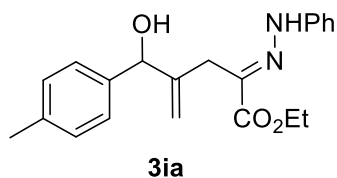

Prepared according to the general procedure as described above in 72% yield (25.4 mg). It was purified by flash chromatography (6.7 – 10.0% EtOAc/PE) to afford a white solid. mp = 79 – 81 °C; <sup>1</sup>H NMR (500 MHz, CDCl<sub>3</sub>) δ 8.48 (s, 1H), 7.31 (d, *J* = 7.7 Hz, 2H), 7.28 – 7.24 (m, 2H), 7.20 (d, *J* = 7.7 Hz, 2H), 7.07 (d, *J* = 7.9 Hz, 2H), 6.94 (t, *J* = 7.3 Hz, 1H), 5.30 (d, *J* = 3.2 Hz, 1H), 5.17 (s, 1H), 4.98 (s, 1H), 4.29 (q, *J* = 7.1 Hz, 2H), 3.36 (q, *J* = 16.6 Hz, 2H), 2.64 (d, *J* = 3.2 Hz, 1H), 2.37 (s, 3H), 1.36 (t, *J* = 7.1 Hz, 3H); <sup>13</sup>C NMR (126 MHz, CDCl<sub>3</sub>) δ 165.7, 144.7, 143.3, 138.2, 137.9, 133.1, 129.4, 129.2, 126.1, 121.9, 114.0, 113.8, 77.6, 61.3, 26.6, 21.2, 14.3; IR (film)  $\nu_{\max}$  3447, 3255, 2924, 1698, 1604, 1569, 1497, 1244, 1194, 1170, 1099 cm<sup>-1</sup>; HRMS (ESI) calcd for C<sub>21</sub>H<sub>25</sub>N<sub>2</sub>O<sub>3</sub><sup>+</sup> [M+H]<sup>+</sup> 353.1860; Found 353.1854.

**Ethyl (E)-4-(hydroxy(4-methoxyphenyl)methyl)-2-(2-phenylhydrazineylidene)pent-4-enoate (3ja)**

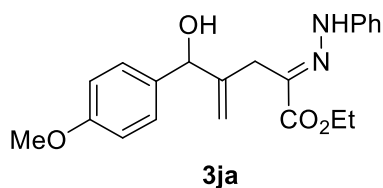

Prepared according to the general procedure as described above in 92% yield (33.8 mg). It was purified by flash chromatography (10.0 – 12.5% EtOAc/PE) to afford a yellow solid. mp = 100 – 102 °C; <sup>1</sup>H NMR (500 MHz, CDCl<sub>3</sub>) δ 8.64 (s, 1H), 7.30 (d, *J* = 8.7 Hz, 2H), 7.27 – 7.23 (m, 2H), 7.10 – 7.07 (m, 2H), 6.92 (t, *J* = 7.4 Hz, 1H), 6.88 (d, *J* = 8.7 Hz, 2H), 5.23 (d, *J* = 3.2 Hz, 1H), 5.10 (s, 1H), 4.94 (s, 1H), 4.26 (q, *J* = 7.1 Hz, 2H), 3.79 (s, 3H), 3.23 (q, *J* = 16.5 Hz, 2H), 3.15 (d, *J* = 3.4 Hz, 1H), 1.34 (t, *J* = 7.1 Hz, 3H); <sup>13</sup>C NMR (126 MHz, CDCl<sub>3</sub>) δ 165.8, 159.4, 145.0, 143.4, 133.3, 133.1, 129.2, 127.4, 121.9, 114.0, 113.6, 77.1, 61.3, 55.3, 26.7, 14.3; IR (film)  $\nu_{\max}$  3447, 3255, 2980, 1698, 1604, 1568, 1509, 1497, 1244, 1170, 1098 cm<sup>-1</sup>; HRMS (ESI) calcd for C<sub>21</sub>H<sub>25</sub>N<sub>2</sub>O<sub>4</sub><sup>+</sup> [M+H]<sup>+</sup> 369.1809; Found 369.1805.

**Ethyl (E)-4-(hydroxy(4-nitrophenyl)methyl)-2-(2-phenylhydrazineylidene)pent-4-enoate (3ka)**

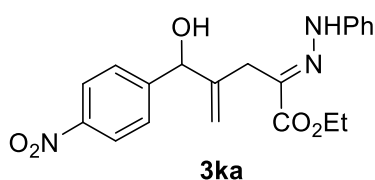

Prepared according to the general procedure as described above in 54% yield (20.7 mg). It was purified by flash chromatography (10.0 – 12.5% EtOAc/PE) to afford a yellow solid. mp = 115 – 117 °C; <sup>1</sup>H NMR (500 MHz, CDCl<sub>3</sub>) δ 8.73 (s, 1H), 8.18 (d, *J* = 8.5 Hz, 2H), 7.58 (d, *J* = 8.5 Hz, 2H), 7.28 (d, *J* = 7.9 Hz, 2H), 7.12 (d, *J* = 7.9 Hz, 2H), 6.96 (t, *J* = 7.3 Hz, 1H), 5.44 (d, *J* = 4.0 Hz, 1H), 5.14 (s, 1H), 5.10 (s, 1H), 4.28 (q, *J* = 7.1 Hz, 2H), 3.63 (d, *J* = 4.1 Hz, 1H), 3.26 (s, 2H), 1.35 (t, *J* = 7.1 Hz, 3H); <sup>13</sup>C NMR (126 MHz, CDCl<sub>3</sub>) δ 165.8, 148.2, 147.5, 144.1, 143.1, 132.4, 129.3, 126.9, 123.7, 122.3, 116.2, 114.0, 76.9, 61.5, 26.4, 14.3; IR (film)  $\nu_{\max}$  3256, 2926, 2854, 1698, 1604, 1559, 1521, 1497, 1243, 1170, 1100 cm<sup>-1</sup>; HRMS (ESI) calcd for C<sub>20</sub>H<sub>22</sub>N<sub>3</sub>O<sub>5</sub><sup>+</sup> [M+H]<sup>+</sup> 384.1554; Found 384.1551.

**Ethyl (E)-4-((4-cyanophenyl)(hydroxy)methyl)-2-(2-phenylhydrazineylidene)pent-4-enoate (3la)**

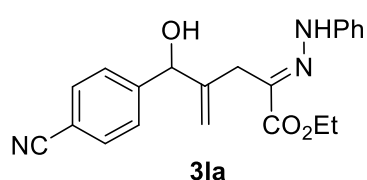

Prepared according to the general procedure as described above in 77% yield (28.0 mg). It was purified by flash chromatography (10.0 – 12.5% EtOAc/PE) to afford a yellow oil. <sup>1</sup>H NMR (500 MHz, CDCl<sub>3</sub>) δ 9.97 (s, 1H), 8.81 (s, 1H), 7.85 (d, *J* = 8.1 Hz, 2H), 7.58 (d, *J* = 8.0 Hz, 2H), 7.27 (d, *J* = 4.1 Hz, 1H), 7.13 – 7.10 (m, 2H), 6.94 (t, *J* = 7.3 Hz, 1H), 5.41 (d, *J* = 3.8 Hz, 1H), 5.12 (s, 1H), 5.05 (s, 1H), 4.27 (q, *J* = 7.1 Hz, 2H), 3.69 (dd, *J* = 3.9, 2.2 Hz, 1H), 3.25 (s, 2H), 1.34 (t, *J* = 7.1 Hz, 3H); <sup>13</sup>C NMR (126 MHz, CDCl<sub>3</sub>) δ 192.0, 165.8, 148.0, 144.3, 143.2, 135.9, 132.6, 130.0, 129.3, 126.7, 122.1, 115.6, 114.0, 77.3, 61.4, 26.3, 14.3; IR (film)  $\nu_{\max}$  3255, 2927, 1698, 1605, 1576, 1559, 1497, 1243, 1209, 1169, 1099 cm<sup>-1</sup>; HRMS (ESI) calcd for C<sub>21</sub>H<sub>22</sub>N<sub>3</sub>O<sub>3</sub><sup>+</sup> [M+H]<sup>+</sup> 364.1656; Found 364.1653.



**Ethyl (E)-4-(hydroxy(4-(trifluoromethyl)phenyl)methyl)-2-(2-phenylhydrazineylidene)pent-4-enoate (3ma)**

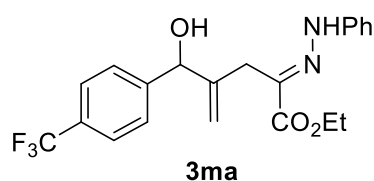

Prepared according to the general procedure as described above in 78% yield (31.5 mg). It was purified by flash chromatography (10.0 – 12.5% EtOAc/PE) to afford a white solid. mp = 120 – 122 °C;  $^1\text{H NMR}$  (500 MHz,  $\text{CDCl}_3$ )  $\delta$  8.61 (s, 1H), 7.61 (d,  $J = 8.1$  Hz, 2H), 7.53 (d,  $J = 8.1$  Hz, 2H), 7.28 – 7.25 (m, 2H), 7.08 (d,  $J = 7.3$  Hz, 2H), 6.97 – 6.93 (m, 1H), 5.39 (d,  $J = 3.7$  Hz, 1H), 5.13 (s, 1H), 5.04 (s, 1H), 4.27 (q,  $J = 7.1$  Hz, 2H), 3.30 (d,  $J = 3.8$  Hz, 1H), 3.26 (s, 2H), 1.34 (t,  $J = 7.1$  Hz, 3H);  $^{13}\text{C NMR}$  (126 MHz,  $\text{CDCl}_3$ )  $\delta$  165.8, 145.0, 144.3, 143.1, 132.6, 130.2 (C-F,  $^2J_{\text{C-F}} = 32.3$  Hz), 129.3, 126.4, 125.5 (C-F,  $^3J_{\text{C-F}} = 3.8$  Hz), 124.1 (C-F,  $^1J_{\text{C-F}} = 272.2$  Hz), 122.2, 115.3, 114.0, 77.1, 61.4, 26.4, 14.3;  $^{19}\text{F NMR}$  (471 MHz,  $\text{CDCl}_3$ )  $\delta$  -62.50; IR (film)  $\nu_{\text{max}}$  3255, 2927, 1698, 1559, 1497, 1324, 1243, 1167, 1123, 1110  $\text{cm}^{-1}$ ; HRMS (ESI) calcd for  $\text{C}_{21}\text{H}_{22}\text{F}_3\text{N}_2\text{O}_3^+ [\text{M}+\text{H}]^+$  407.1577; Found 407.1575

**Ethyl (E)-4-([1,1'-biphenyl]-4-yl(hydroxy)methyl)-2-(2-phenylhydrazineylidene)pent-4-enoate (3na)**

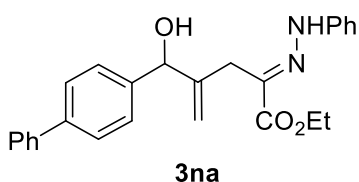

Prepared according to the general procedure as described above in 70% yield (28.9 mg). It was purified by flash chromatography (6.7 – 10.0% EtOAc/PE) to afford a colorless oil.  $^1\text{H NMR}$  (500 MHz,  $\text{CDCl}_3$ )  $\delta$  8.48 (s, 1H), 7.63 – 7.58 (m, 4H), 7.52 – 7.49 (m, 2H), 7.45 (dd,  $J = 8.4, 7.0$  Hz, 2H), 7.38 – 7.35 (m, 1H), 7.25 – 7.21 (m, 2H), 7.06 (dd,  $J = 8.6, 1.1$  Hz, 2H), 6.93 (tt,  $J = 7.3, 1.2$  Hz, 1H), 5.39 (d,  $J = 3.3$  Hz, 1H), 5.22 (s, 1H), 5.02 (s, 1H), 4.30 (q,  $J = 7.1$  Hz, 2H), 3.31 (q,  $J = 16.6$  Hz, 2H), 2.80 (d,  $J = 3.4$  Hz, 1H), 1.36 (t,  $J = 7.1$  Hz, 3H);  $^{13}\text{C NMR}$  (126 MHz,  $\text{CDCl}_3$ )  $\delta$  165.7, 144.6, 143.3, 141.1, 140.5, 140.2, 133.0, 129.2, 128.9, 127.5, 127.4, 127.1, 126.6, 121.9, 114.2, 114.0, 77.5, 61.3, 26.6, 14.4; IR (film)  $\nu_{\text{max}}$  3254, 2924, 1698, 1684, 1604, 1559, 1497, 1243, 1193, 1170, 1099  $\text{cm}^{-1}$ ; HRMS (ESI) calcd for  $\text{C}_{26}\text{H}_{27}\text{N}_2\text{O}_3^+ [\text{M}+\text{H}]^+$  415.2016; Found 415.2019.

**Ethyl (E)-4-(cyclohexyl(hydroxy)methyl)-2-(2-phenylhydrazineylidene)pent-4-enoate (3oa)**

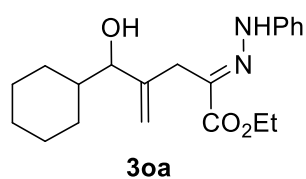

Prepared according to the general procedure as described above in 82% yield (28.1 mg). It was purified by flash chromatography (6.7 % EtOAc/PE) to afford a yellow solid. mp = 85 – 87 °C; <sup>1</sup>H NMR (500 MHz, CDCl<sub>3</sub>) δ 9.30 (s, 1H), 7.28 – 7.24 (m, 2H), 7.20 – 7.14 (m, 2H), 6.92 (t, *J* = 7.3 Hz, 1H), 4.96 (d, *J* = 2.2 Hz, 2H), 4.33 (qq, *J* = 7.2, 3.6 Hz, 2H), 3.89 (dd, *J* = 8.9, 3.3 Hz, 1H), 3.57 (dt, *J* = 16.1, 2.4 Hz, 1H), 3.09 (d, *J* = 16.0 Hz, 1H), 2.51 (d, *J* = 3.5 Hz, 1H), 2.01 (d, *J* = 12.6 Hz, 1H), 1.84 – 1.79 (m, 1H), 1.74 (d, *J* = 15.3 Hz, 1H), 1.69 (d, *J* = 12.3 Hz, 1H), 1.59 (d, *J* = 13.0 Hz, 1H), 1.54 – 1.48 (m, 1H), 1.39 (t, *J* = 7.1 Hz, 3H), 1.29 – 1.22 (m, 2H), 1.16 (ddd, *J* = 15.9, 8.0, 3.4 Hz, 1H), 1.04 – 0.96 (m, 1H), 0.92 – 0.84 (m, 1H); <sup>13</sup>C NMR (126 MHz, CDCl<sub>3</sub>) δ 166.0, 143.6, 133.7, 129.2, 121.7, 115.2, 114.0, 82.6, 61.3, 40.6, 29.4, 29.3, 26.3, 25.9, 25.8, 25.1, 14.4; IR (film)  $\nu_{\max}$  3245, 2925, 1698, 1605, 1569, 1559, 1497, 1240, 1192, 1169, 1099 cm<sup>-1</sup>; HRMS (ESI) calcd for C<sub>20</sub>H<sub>29</sub>N<sub>2</sub>O<sub>3</sub><sup>+</sup> [M+H]<sup>+</sup> 345.2173; Found 345.2169.

**Ethyl (E)-2-(2-(2-fluorophenyl)hydrazineylidene)-4-(hydroxy(phenyl)methyl)pent-4-enoate (3ab)**

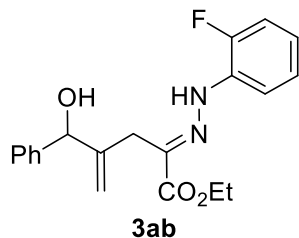

Prepared according to the general procedure as described above in 87% yield (31.0 mg). It was purified by flash chromatography (6.7 – 10.0% EtOAc/PE) to afford a yellow solid. mp = 61 – 63 °C; <sup>1</sup>H NMR (500 MHz, CDCl<sub>3</sub>) δ 8.80 (d, *J* = 2.6 Hz, 1H), 7.60 (td, *J* = 8.2, 1.7 Hz, 1H), 7.40 – 7.37 (m, 2H), 7.35 – 7.32 (m, 2H), 7.29 – 7.26 (m, 1H), 7.10 – 7.06 (m, 1H), 7.01 (ddd, *J* = 11.6, 8.2, 1.4 Hz, 1H), 6.89 – 6.85 (m, 1H), 5.27 (d, *J* = 3.7 Hz, 1H), 5.16 (s, 1H), 5.02 (s, 1H), 4.27 (q, *J* = 7.1 Hz, 2H), 3.30 (q, *J* = 16.4 Hz, 2H), 2.98 (d, *J* = 3.7 Hz, 1H), 1.34 (t, *J* = 7.1 Hz, 3H); <sup>13</sup>C NMR (126 MHz, CDCl<sub>3</sub>) δ 165.5, 150.60 (C-F, <sup>1</sup>*J*<sub>C-F</sub> = 241.0 Hz), 144.4, 141.0, 135.4, 131.78 (C-F, <sup>3</sup>*J*<sub>C-F</sub> = 9.1 Hz), 128.6, 127.9, 126.5, 126.1, 124.89 (C-F, <sup>3</sup>*J*<sub>C-F</sub> = 3.3 Hz), 121.60 (C-F, <sup>3</sup>*J*<sub>C-F</sub> = 7.1 Hz), 115.74 (C-F, <sup>3</sup>*J*<sub>C-F</sub> = 2.1 Hz), 115.1, 115.0, 114.2, 77.1, 61.5, 27.3, 14.3; <sup>19</sup>F NMR (471 MHz, CDCl<sub>3</sub>) δ -135.07; IR (film)  $\nu_{\max}$  3447, 2981, 1699, 1624, 1577, 1489, 1283, 1256, 1189, 1105 cm<sup>-1</sup>; HRMS (ESI) calcd for C<sub>20</sub>H<sub>22</sub>FN<sub>2</sub>O<sub>3</sub><sup>+</sup> [M+H]<sup>+</sup> 357.1609; Found 357.1603.

**Ethyl (E)-2-(2-(3-fluorophenyl)hydrazineylidene)-4-(hydroxy(phenyl)methyl)pent-4-enoate (3ac)**

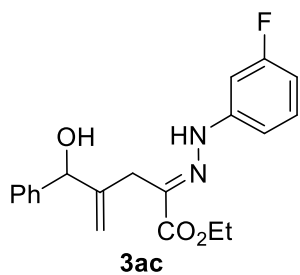

Prepared according to the general procedure as described above in 87% yield (30.8 mg). It was purified by flash chromatography (6.7 – 10.0% EtOAc/PE) to afford a white solid. mp = 88 – 90 °C; <sup>1</sup>H NMR (500 MHz, CDCl<sub>3</sub>) δ 8.75 (s, 1H), 7.42 (d, *J* = 7.3 Hz, 2H), 7.40 – 7.36 (m, 2H), 7.33 (t, *J* = 6.8 Hz, 1H), 7.18 (q, *J* = 8.0 Hz, 1H), 6.89 (d, *J* = 10.8 Hz, 1H), 6.79 (d, *J* = 8.0 Hz, 1H), 6.64 – 6.58 (m, 1H), 5.35 (d, *J* = 3.3 Hz, 1H), 5.15 (s, 1H), 4.99 (s, 1H), 4.28 (q, *J* = 7.1 Hz, 2H), 3.28 (q, *J* = 16.5 Hz, 2H), 2.95 (d, *J* = 3.2 Hz, 1H), 1.35 (t, *J* = 7.1 Hz, 3H); <sup>13</sup>C NMR (126 MHz, CDCl<sub>3</sub>) δ 165.5, 163.8 (C-F, <sup>1</sup>*J*<sub>C-F</sub> = 244.3 Hz), 145.2 (C-F, <sup>2</sup>*J*<sub>C-F</sub> = 10.6 Hz), 144.5, 141.0, 134.3, 130.4, 130.3, 128.7, 128.2, 126.0, 114.6, 109.6 (C-F, <sup>3</sup>*J*<sub>C-F</sub> = 2.8 Hz), 108.4 (C-F, <sup>2</sup>*J*<sub>C-F</sub> = 21.9 Hz), 101.4 (C-F, <sup>2</sup>*J*<sub>C-F</sub> = 26.3 Hz), 77.8, 61.5, 26.5, 14.3; <sup>19</sup>F NMR (471 MHz, CDCl<sub>3</sub>) δ -112.04; IR (film) ν<sub>max</sub> 3254, 2981, 1699, 1616, 1576, 1495, 1273, 1190, 1138, 1098 cm<sup>-1</sup>; HRMS (ESI) calcd for C<sub>20</sub>H<sub>22</sub>FN<sub>2</sub>O<sub>3</sub><sup>+</sup> [M+H]<sup>+</sup> 357.1609; Found 357.1604.

**Ethyl (E)-2-(2-(4-fluorophenyl)hydrazineylidene)-4-(hydroxy(phenyl)methyl)pent-4-enoate (3ad)**

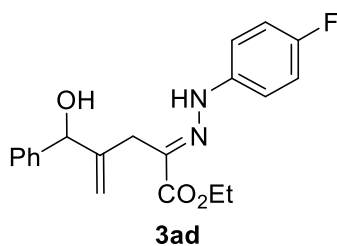

Prepared according to the general procedure as described above in 85% yield (30.3 mg). It was purified by flash chromatography (6.7 – 10.0% EtOAc/PE) to afford a yellow solid. mp = 58 – 60 °C; <sup>1</sup>H NMR (500 MHz, CDCl<sub>3</sub>) δ 8.70 (s, 1H), 7.41 – 7.35 (m, 4H), 7.33 – 7.29 (m, 1H), 7.05 – 7.01 (m, 2H), 6.95 – 6.91 (m, 2H), 5.31 (d, *J* = 3.4 Hz, 1H), 5.12 (s, 1H), 4.96 (s, 1H), 4.25 (q, *J* = 7.1 Hz, 2H), 3.29 (d, *J* = 3.6 Hz, 1H), 3.22 (t, *J* = 16.0 Hz, 2H), 1.33 (t, *J* = 7.1 Hz, 3H); <sup>13</sup>C NMR (126 MHz, CDCl<sub>3</sub>) δ 165.7, 158.3 (C-F, <sup>1</sup>*J*<sub>C-F</sub> = 239.7 Hz), 144.7, 141.2, 139.7 (C-F, <sup>3</sup>*J*<sub>C-F</sub> = 2.2 Hz), 133.1, 128.6, 128.0, 126.1, 115.9, 115.7, 115.12, 115.05, 114.2, 77.7, 61.4, 26.4, 14.3; <sup>19</sup>F NMR (471 MHz, CDCl<sub>3</sub>) δ -122.20; IR (film) ν<sub>max</sub> 3255, 2981, 1698, 1569, 1559, 1506, 1249, 1202, 1103 cm<sup>-1</sup>; HRMS (ESI) calcd for C<sub>20</sub>H<sub>22</sub>FN<sub>2</sub>O<sub>3</sub><sup>+</sup> [M+H]<sup>+</sup> 357.1609; Found 357.1604.

**Ethyl (E)-2-(2-(3-chlorophenyl)hydrazineylidene)-4-(hydroxy(phenyl)methyl)pent-4-enoate (3ae)**

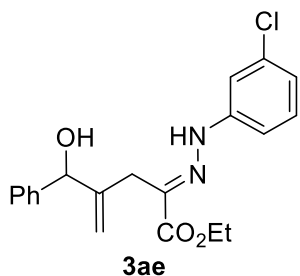

Prepared according to the general procedure as described above in 81% yield (30.2 mg). It was purified by flash chromatography (6.7 – 10.0% EtOAc/PE) to afford a yellow solid. mp = 113 – 115 °C; <sup>1</sup>H NMR (500 MHz, CDCl<sub>3</sub>) δ 8.74 (s, 1H), 7.43 – 7.40 (m, 2H), 7.37 (d, *J* = 7.7 Hz, 2H), 7.35 – 7.32 (m, 1H), 7.15 (t, *J* = 8.1 Hz, 1H), 7.09 (t, *J* = 2.1 Hz, 1H), 6.95 (dd, *J* = 8.1, 2.2 Hz, 1H), 6.88 (dd, *J* = 8.0, 2.0 Hz, 1H), 5.34 (d, *J* = 3.2 Hz, 1H), 5.14 (s, 1H), 4.97 (s, 1H), 4.28 (q, *J* = 7.1 Hz, 2H), 3.26 (q, *J* = 16.5 Hz, 2H), 3.07 (d, *J* = 3.3 Hz, 1H), 1.35 (t, *J* = 7.1 Hz, 3H); <sup>13</sup>C NMR (126 MHz, CDCl<sub>3</sub>) δ 165.5, 144.6, 144.5, 141.0, 135.0, 134.5, 130.2, 128.7, 128.2, 126.0, 121.7, 114.6, 114.1, 112.1, 77.8, 61.5, 26.4, 14.3; IR (film) ν<sub>max</sub> 3245, 2981, 1699, 1599, 1569, 1559, 1473, 1240, 1190, 1095 cm<sup>-1</sup>; HRMS (ESI) calcd for C<sub>20</sub>H<sub>22</sub>ClN<sub>2</sub>O<sub>3</sub><sup>+</sup> [M+H]<sup>+</sup> 373.1313; Found 373.1310.

**Ethyl (E)-2-(2-(3-bromophenyl)hydrazineylidene)-4-(hydroxy(phenyl)methyl)pent-4-enoate (3ag)**

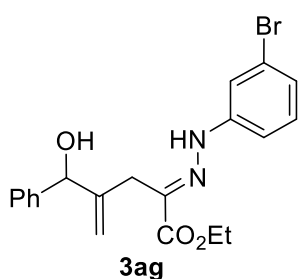

Prepared according to the general procedure as described above in 47% yield (19.6 mg). It was purified by flash chromatography (6.7 – 10.0% EtOAc/PE) to afford a yellow solid. mp = 98 – 100 °C; <sup>1</sup>H NMR (500 MHz, CDCl<sub>3</sub>) δ 8.70 (s, 1H), 7.44 – 7.40 (m, 3H), 7.38 (d, *J* = 7.6 Hz, 2H), 7.34 (d, *J* = 7.0 Hz, 1H), 7.10 (d, *J* = 7.9 Hz, 1H), 7.04 (s, 1H), 7.00 (d, *J* = 8.0 Hz, 1H), 5.34 (d, *J* = 3.2 Hz, 1H), 5.14 (s, 1H), 4.97 (s, 1H), 4.28 (d, *J* = 7.1 Hz, 2H), 3.26 (q, *J* = 16.5 Hz, 2H), 3.05 (d, *J* = 3.3 Hz, 1H), 1.35 (t, *J* = 7.1 Hz, 3H); <sup>13</sup>C NMR (126 MHz, CDCl<sub>3</sub>) δ 165.5, 144.7, 144.5, 141.0, 134.5, 130.5, 128.7, 128.2, 126.0, 124.6, 123.1, 117.0, 114.5, 112.6, 77.8, 61.5, 26.4, 14.3; IR (film) ν<sub>max</sub> 3246, 2926, 1699, 1596, 1570, 1559, 1473, 1236, 1190, 1101 cm<sup>-1</sup>; HRMS (ESI) calcd for C<sub>20</sub>H<sub>22</sub>BrN<sub>2</sub>O<sub>3</sub><sup>+</sup> [M+H]<sup>+</sup> 417.0808; Found 417.0805.

**Ethyl (E)-2-(2-(4-bromophenyl)hydrazineylidene)-4-(hydroxy(phenyl)methyl)pent-4-enoate (3ah)**

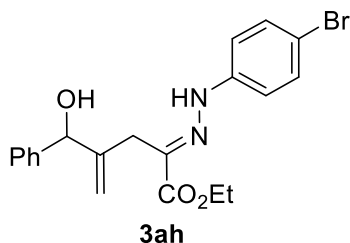

Prepared according to the general procedure as described above in 51% yield (21.3 mg). It was purified by flash chromatography (6.7 – 10.0% EtOAc/PE) to afford a yellow solid. mp = 144 – 146 °C; <sup>1</sup>H NMR (500 MHz, CDCl<sub>3</sub>) δ 8.65 (s, 1H), 7.44 – 7.41 (m, 2H), 7.41 – 7.38 (m, 2H), 7.38 – 7.35 (m, 2H), 7.34 (d, *J* = 3.2 Hz, 1H), 6.98 – 6.95 (m, 2H), 5.36 (d, *J* = 3.2 Hz, 1H), 5.16 (s, 1H), 5.00 (s, 1H), 4.29 (q, *J* = 7.1 Hz, 2H), 3.32 (dt, *J* = 16.5, 1.7 Hz, 1H), 3.25 (d, *J* = 16.5 Hz, 1H), 2.73 (d, *J* = 3.5 Hz, 1H), 1.35 (t, *J* = 7.1 Hz, 3H); <sup>13</sup>C NMR (126 MHz, CDCl<sub>3</sub>) δ 165.5, 144.4, 142.5, 141.0, 134.0, 132.0, 128.7, 128.2, 126.0, 115.6, 114.6, 114.0, 77.8, 61.4, 26.5, 14.3; IR (film) ν<sub>max</sub> 3245, 2925, 1698, 1559, 1541, 1507, 1489, 1457, 1243, 1192 cm<sup>-1</sup>; HRMS (ESI) calcd for C<sub>20</sub>H<sub>22</sub>BrN<sub>2</sub>O<sub>3</sub><sup>+</sup> [M+H]<sup>+</sup> 417.0808; Found 417.0804.

**Ethyl (E)-4-(hydroxy(phenyl)methyl)-2-(2-(p-tolyl)hydrazineylidene)pent-4-enoate (3ai)**

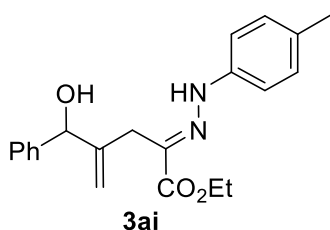

Prepared according to the general procedure as described above in 88% yield (31.1 mg). It was purified by flash chromatography (6.7 – 10.0% EtOAc/PE) to afford a colorless oil.  $^1\text{H}$  NMR (500 MHz,  $\text{CDCl}_3$ )  $\delta$  8.50 (s, 1H), 7.45 – 7.39 (m, 2H), 7.39 – 7.35 (m, 2H), 7.34 – 7.30 (m, 1H), 7.05 (d,  $J = 8.3$  Hz, 2H), 6.98 (d,  $J = 8.5$  Hz, 2H), 5.30 (s, 1H), 5.13 (s, 1H), 4.97 (s, 1H), 4.27 (q,  $J = 7.1$  Hz, 2H), 3.25 (q,  $J = 16.6$  Hz, 2H), 2.94 (d,  $J = 3.3$  Hz, 1H), 2.28 (s, 3H), 1.34 (t,  $J = 7.1$  Hz, 3H);  $^{13}\text{C}$  NMR (126 MHz,  $\text{CDCl}_3$ )  $\delta$  165.7, 144.6, 141.2, 141.0, 132.3, 131.4, 129.7, 128.7, 128.1, 126.1, 114.0, 113.9, 77.6, 61.2, 26.6, 20.7, 14.4; IR (film)  $\nu_{\text{max}}$  3255, 2923, 1697, 1559, 1508, 1288, 1242, 1192, 1174, 1096  $\text{cm}^{-1}$ ; HRMS (ESI) calcd for  $\text{C}_{21}\text{H}_{25}\text{N}_2\text{O}_3^+ [\text{M}+\text{H}]^+$  353.1860; Found 353.1855.

**Ethyl (E)-2-(2-(4-ethylphenyl)hydrazineylidene)-4-(hydroxy(phenyl)methyl)pent-4-enoate (3aj)**

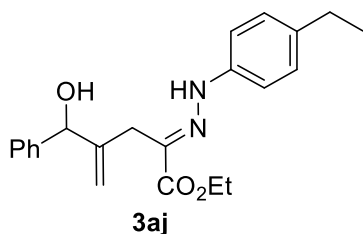

Prepared according to the general procedure as described above in 90% yield (33.0 mg). It was purified by flash chromatography (6.7 – 10.0% EtOAc/PE) to afford a yellow oil.  $^1\text{H}$  NMR (500 MHz,  $\text{CDCl}_3$ )  $\delta$  8.51 (s, 1H), 7.42 – 7.40 (m, 2H), 7.37 (dd,  $J = 8.3, 6.4$  Hz, 2H), 7.34 – 7.29 (m, 1H), 7.08 (d,  $J = 8.2$  Hz, 2H), 7.02 – 6.99 (m, 2H), 5.30 (d,  $J = 3.3$  Hz, 1H), 5.12 (s, 1H), 4.95 (s, 1H), 4.26 (d,  $J = 7.1$  Hz, 2H), 3.24 (d,  $J = 9.1$  Hz, 2H), 3.09 (d,  $J = 3.4$  Hz, 1H), 2.57 (d,  $J = 7.6$  Hz, 2H), 1.33 (t,  $J = 7.1$  Hz, 3H), 1.19 (t,  $J = 7.6$  Hz, 3H);  $^{13}\text{C}$  NMR (126 MHz,  $\text{CDCl}_3$ )  $\delta$  165.8, 144.7, 141.3, 141.2, 138.0, 132.3, 128.6, 128.5, 128.0, 126.1, 114.1, 113.9, 77.6, 61.3, 28.2, 26.5, 15.9, 14.4; IR (film)  $\nu_{\text{max}}$  3255, 2963, 2928, 1697, 1559, 1518, 1508, 1245, 1192, 1097  $\text{cm}^{-1}$ ; HRMS (ESI) calcd for  $\text{C}_{22}\text{H}_{27}\text{N}_2\text{O}_3^+ [\text{M}+\text{H}]^+$  367.2016; Found 367.2012.

**Ethyl (E)-4-(hydroxy(phenyl)methyl)-2-(2-(2-methoxyphenyl)hydrazineylidene)pent-4-enoate (3ak)**

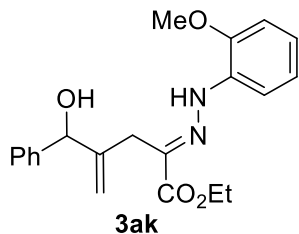

Prepared according to the general procedure as described above in 99% yield (36.5 mg). It was purified by flash chromatography (10.0 – 12.5% EtOAc/PE) to afford a yellow solid. mp = 77 – 79  $^{\circ}\text{C}$ ;  $^1\text{H}$  NMR (500 MHz,  $\text{CDCl}_3$ )  $\delta$  8.69 (s, 1H), 7.53 (dd,  $J = 7.8, 1.8$  Hz, 1H), 7.40 (d,  $J = 7.1$  Hz, 2H), 7.35 – 7.27 (m, 3H), 6.93 (dtd,  $J = 22.2, 7.5, 1.6$  Hz, 2H), 6.84 (dd,  $J = 7.9, 1.5$  Hz, 1H), 5.25 (d,  $J = 3.9$  Hz, 1H), 5.22 (s, 1H), 5.06 (s, 1H), 4.27 (q,  $J = 7.1$  Hz, 2H), 3.86 (s, 3H), 3.33 (s, 2H), 2.82 (d,  $J = 4.1$  Hz, 1H), 1.34 (t,  $J = 7.1$  Hz, 3H);  $^{13}\text{C}$  NMR (126 MHz,  $\text{CDCl}_3$ )  $\delta$  165.8, 146.3, 144.5, 141.1, 133.5, 132.6, 128.4, 127.8, 126.3, 121.62, 121.59, 113.82, 113.79, 110.4, 76.7, 61.3, 55.8, 28.1, 14.3; IR (film)  $\nu_{\text{max}}$  3349, 2935, 1698, 1559, 1517, 1508, 1254, 1216, 1176, 1115  $\text{cm}^{-1}$ ; HRMS (ESI) calcd for  $\text{C}_{21}\text{H}_{25}\text{N}_2\text{O}_4^+ [\text{M}+\text{H}]^+$  369.1809; Found 369.1803.

**Ethyl (E)-4-(hydroxy(phenyl)methyl)-2-(2-(3-methoxyphenyl)hydrazineylidene)pent-4-enoate (3al)**

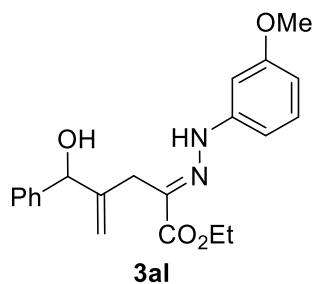

Prepared according to the general procedure as described above in 91% yield (33.5 mg). It was purified by flash chromatography (10.0 – 12.5% EtOAc/PE) to afford a yellow oil.  $^1\text{H}$  NMR (500 MHz,  $\text{CDCl}_3$ )  $\delta$  8.57 (s, 1H), 7.42 (d,  $J = 6.7$  Hz, 2H), 7.38 (d,  $J = 7.9$  Hz, 2H), 7.34 – 7.31 (m, 1H), 7.14 (d,  $J = 8.1$  Hz, 1H), 6.73 (t,  $J = 2.3$  Hz, 1H), 6.63 (dd,  $J = 8.0, 2.1$  Hz, 1H), 6.50 (dd,  $J = 8.1, 2.5$  Hz, 1H), 5.33 (d,  $J = 3.1$  Hz, 1H), 5.15 (s, 1H), 4.98 (s, 1H), 4.27 (t,  $J = 7.1$  Hz, 2H), 3.80 (s, 3H), 3.27 (d,  $J = 14.2$  Hz, 2H), 2.86 (d,  $J = 3.2$  Hz, 1H), 1.35 (t,  $J = 7.1$  Hz, 3H);  $^{13}\text{C}$  NMR (126 MHz,  $\text{CDCl}_3$ )  $\delta$  165.7, 160.7, 144.7, 144.6, 141.2, 133.2, 130.0, 128.7, 128.1, 126.1, 114.2, 107.6, 106.7, 99.8, 77.7, 61.3, 55.3, 26.5, 14.3; IR (film)  $\nu_{\text{max}}$  3255, 2930, 1698, 1601, 1569, 1496, 1285, 1200, 1152, 1100  $\text{cm}^{-1}$ ; HRMS (ESI) calcd for  $\text{C}_{21}\text{H}_{25}\text{N}_2\text{O}_4^+$   $[\text{M}+\text{H}]^+$  369.1809; Found 369.1805.

**Ethyl (E)-4-(hydroxy(phenyl)methyl)-2-(2-(4-methoxyphenyl)hydrazineylidene)pent-4-enoate (3am)**

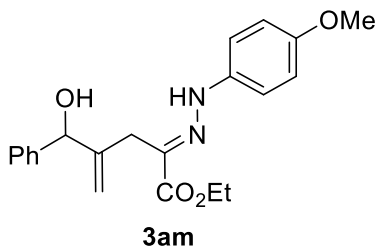

Prepared according to the general procedure as described above in 86% yield (31.8 mg). It was purified by flash chromatography (10.0 – 12.5% EtOAc/PE) to afford a red oil.  $^1\text{H}$  NMR (500 MHz,  $\text{CDCl}_3$ )  $\delta$  8.46 (s, 1H), 7.42 (d,  $J = 7.1$  Hz, 2H), 7.38 (t,  $J = 7.4$  Hz, 2H), 7.34 – 7.31 (m, 1H), 7.02 (d,  $J = 9.0$  Hz, 2H), 6.82 (d,  $J = 9.0$  Hz, 2H), 5.33 – 5.31 (m, 1H), 5.15 (s, 1H), 4.98 (s, 1H), 4.26 (t,  $J = 7.1$  Hz, 2H), 3.76 (s, 3H), 3.25 (d,  $J = 14.4$  Hz, 2H), 2.93 (d,  $J = 3.2$  Hz, 1H), 1.34 (t,  $J = 7.1$  Hz, 3H);  $^{13}\text{C}$  NMR (126 MHz,  $\text{CDCl}_3$ )  $\delta$  165.8, 155.0, 144.7, 141.3, 137.3, 131.8, 128.6, 128.0, 126.1, 115.1, 114.6, 113.9, 77.6, 61.2, 55.6, 26.5, 14.4; IR (film)  $\nu_{\text{max}}$  3255, 2932, 1697, 1559, 1508, 1231, 1196, 1179, 1096, 1035  $\text{cm}^{-1}$ ; HRMS (ESI) calcd for  $\text{C}_{21}\text{H}_{25}\text{N}_2\text{O}_4^+$   $[\text{M}+\text{H}]^+$  369.1809; Found 369.1802.

**Ethyl (E)-4-(hydroxy(phenyl)methyl)-2-(2-(4-(trifluoromethyl)phenyl)hydrazineylidene)pent-4-enoate (3an)**

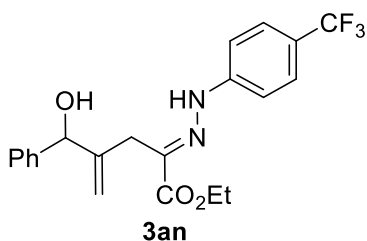

Prepared according to the general procedure as described above in 47% yield (19.1 mg). It was purified by flash chromatography (10.0% EtOAc/PE) to afford a yellow solid. mp = 133 – 135  $^{\circ}\text{C}$ ;  $^1\text{H}$  NMR (500 MHz,  $\text{CDCl}_3$ )  $\delta$  8.97 (s, 1H), 7.48 (d,  $J = 8.4$  Hz, 2H), 7.42 – 7.37 (m, 4H), 7.35 – 7.31 (m, 1H), 7.14 (d,  $J = 8.4$  Hz, 2H), 5.35 (d,  $J = 3.2$  Hz, 1H), 5.13 (s, 1H), 4.99 (s, 1H), 4.28 (q,  $J = 7.1$  Hz, 2H), 3.27 (q,  $J = 16.3$  Hz, 2H), 3.16 (d,  $J = 3.4$  Hz, 1H), 1.35 (t,  $J = 7.1$  Hz, 3H);  $^{13}\text{C}$  NMR (126 MHz,  $\text{CDCl}_3$ )  $\delta$  165.4, 146.1, 144.5, 141.0, 135.4, 128.7, 128.2, 127.7, 126.5 (C-F,  $^1J_{\text{C-F}} = 3.7$  Hz), 126.0, 125.6, 123.5 (C-F,  $^2J_{\text{C-F}} = 32.4$  Hz), 123.4, 123.1, 121.3, 114.8, 113.7, 61.6, 26.5, 14.3;  $^{19}\text{F}$  NMR (471 MHz,  $\text{CDCl}_3$ )  $\delta$  -61.54; IR (film)  $\nu_{\text{max}}$  3255, 2929, 1699, 1617, 1323, 1251, 1173, 1111, 1064  $\text{cm}^{-1}$ ; HRMS (ESI) calcd for  $\text{C}_{21}\text{H}_{22}\text{F}_3\text{N}_2\text{O}_3^+$   $[\text{M}+\text{H}]^+$  407.1577; Found 407.1574.

**Ethyl (E)-4-(hydroxy(phenyl)methyl)-2-(2-(naphthalen-2-yl)hydrazineylidene)pent-4-enoate (3ao)**

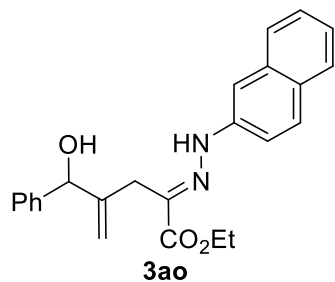

Prepared according to the general procedure as described above in 88% yield (34.2 mg). It was purified by flash chromatography (6.7 – 10.0% EtOAc/PE) to afford a red solid. mp = 78 – 80 °C; <sup>1</sup>H NMR (500 MHz, CDCl<sub>3</sub>) δ 8.82 (s, 1H), 7.75 – 7.69 (m, 3H), 7.45 – 7.37 (m, 6H), 7.35 – 7.28 (m, 3H), 5.36 (s, 1H), 5.16 (s, 1H), 5.02 (s, 1H), 4.31 (q, *J* = 7.1 Hz, 2H), 3.32 (q, *J* = 16.6 Hz, 2H), 2.99 (d, *J* = 3.3 Hz, 1H), 1.37 (t, *J* = 7.1 Hz, 3H); <sup>13</sup>C NMR (126 MHz, CDCl<sub>3</sub>)

δ 165.7, 144.6, 141.2, 141.0, 134.3, 133.5, 129.8, 129.3, 128.7, 128.1, 127.8, 126.9, 126.6, 126.1, 123.8, 115.7, 114.3, 109.1, 77.8, 61.4, 26.6, 14.4; IR (film)  $\nu_{\max}$  3255, 2981, 1698, 1632, 1559, 1541, 1508, 1253, 1179, 1096 cm<sup>-1</sup>; HRMS (ESI) calcd for C<sub>24</sub>H<sub>25</sub>N<sub>2</sub>O<sub>3</sub><sup>+</sup> [M+H]<sup>+</sup> 389.1860; Found 389.1853.

**Ethyl (E)-2-(2-benzylhydrazineylidene)-4-(hydroxy(phenyl)methyl)pent-4-enoate (3ap)**

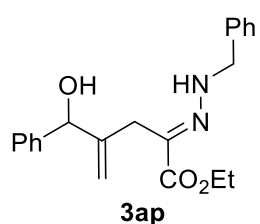

Prepared according to the general procedure as described above in 67% yield (23.6 mg). It was purified by flash chromatography (6.7 – 10.0% EtOAc/PE) to afford a yellow oil. <sup>1</sup>H NMR (500 MHz, CDCl<sub>3</sub>) δ 7.33 (t, *J* = 7.2 Hz, 2H), 7.30 (d, *J* = 6.7 Hz, 1H), 7.27 (dd, *J* = 6.9, 2.9 Hz, 2H), 7.22 (d, *J* = 5.7 Hz, 4H), 6.21 (t, *J* = 4.9 Hz, 1H), 5.17 (d, *J* = 3.4 Hz, 1H),

5.14 (s, 1H), 4.89 (s, 1H), 4.52 (d, *J* = 4.8 Hz, 2H), 4.26 (q, *J* = 7.1 Hz, 2H), 3.10 (s, 2H), 2.53 (d, *J* = 3.6 Hz, 1H), 1.31 (t, *J* = 7.1 Hz, 3H); <sup>13</sup>C NMR (126 MHz, CDCl<sub>3</sub>) δ 165.6, 144.4, 141.2, 138.0, 131.6, 128.6, 128.5, 128.0, 127.9, 127.6, 126.1, 112.6, 61.2, 55.4, 27.1, 14.4; IR (film)  $\nu_{\max}$  3308, 2928, 1716, 1698, 1684, 1559, 1541, 1507, 1457 cm<sup>-1</sup>; HRMS (ESI) calcd for C<sub>21</sub>H<sub>25</sub>N<sub>2</sub>O<sub>3</sub><sup>+</sup> [M+H]<sup>+</sup> 353.1860; Found 353.1854.

**Ethyl (E)-2-(2-(tert-butyl)hydrazineylidene)-4-(hydroxy(phenyl)methyl)pent-4-enoate (3aq)**

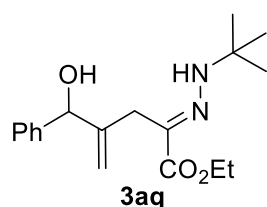

Prepared according to the general procedure as described above in 78% yield (24.7 mg). It was purified by flash chromatography (6.7 – 10.0% EtOAc/PE) to afford a yellow solid. mp = 85 – 87 °C; <sup>1</sup>H NMR (500 MHz, CDCl<sub>3</sub>) δ 7.40 (d, *J* = 7.1 Hz, 2H), 7.35 (t, *J* = 7.5 Hz, 2H), 7.31 – 7.28 (m, 1H), 5.90 (s, 1H), 5.22 (d, *J* = 3.1 Hz, 1H), 5.18 (s, 1H), 4.87

(s, 1H), 4.20 (q, *J* = 7.1 Hz, 2H), 3.08 (s, 2H), 2.72 (d, *J* = 3.7 Hz, 1H), 1.28 (t, *J* = 7.1 Hz, 3H), 1.17 (s, 9H); <sup>13</sup>C NMR (126 MHz, CDCl<sub>3</sub>) δ 165.9, 144.7, 141.6, 130.0, 128.6, 127.9, 126.2, 111.9, 77.1, 60.7, 54.8, 28.7, 27.0, 14.3; IR (film)  $\nu_{\max}$  3447, 2966, 2926, 1698, 1684, 1559, 1541, 1457, 1198, 1107 cm<sup>-1</sup>; HRMS (ESI) calcd for C<sub>18</sub>H<sub>27</sub>N<sub>2</sub>O<sub>3</sub><sup>+</sup> [M+H]<sup>+</sup> 319.2016; Found 319.2012.

**Ethyl (E)-4-(hydroxy(phenyl)methyl)-2-(2-(pyridin-2-yl)hydrazineylidene)pent-4-enoate (3ar)**

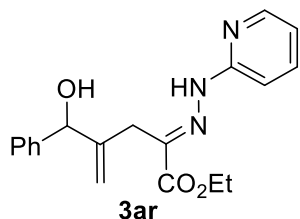

Prepared according to the general procedure as described above in 66% yield (22.5 mg). It was purified by flash chromatography (6.7 – 10.0% EtOAc/PE) to afford a colorless oil.  $^1\text{H}$  NMR (500 MHz,  $\text{CDCl}_3$ )  $\delta$  8.22 (ddd,  $J = 5.1, 2.0, 0.9$  Hz, 1H), 7.71 (d,  $J = 8.6$  Hz, 1H), 7.65 (ddd,  $J = 8.7, 7.0, 1.9$  Hz, 1H), 7.35 (dd,  $J = 8.3, 1.8$  Hz, 2H), 7.33 – 7.30 (m, 2H), 7.28 – 7.25 (m, 1H), 6.94 (ddd,  $J = 7.0, 5.0, 1.1$  Hz, 1H), 6.81 (s, 1H), 5.23 (d,  $J = 4.2$  Hz, 1H), 5.11 (s, 1H), 5.01 – 4.96 (m, 2H), 4.70 (d,  $J = 17.2$  Hz, 1H), 4.65 (d,  $J = 4.4$  Hz, 1H), 4.28 (t,  $J = 7.1$  Hz, 2H), 1.35 (t,  $J = 7.1$  Hz, 3H);  $^{13}\text{C}$  NMR (126 MHz,  $\text{CDCl}_3$ )  $\delta$  164.2, 156.7, 146.7, 143.5, 140.7, 138.4, 128.3, 127.6, 126.2, 124.7, 118.2, 114.6, 111.5, 74.8, 60.9, 46.2, 14.3; IR (film)  $\nu_{\text{max}}$  3447, 2927, 1716, 1705, 1593, 1559, 1466, 1439, 1161, 1142  $\text{cm}^{-1}$ ; HRMS (ESI) calcd for  $\text{C}_{19}\text{H}_{22}\text{N}_3\text{O}_3^+$   $[\text{M}+\text{H}]^+$  340.1656; Found 340.1653.

**Ethyl 5-methylene-1,6-diphenyl-1,4,5,6-tetrahydropyridazine-3-carboxylate (4a)**

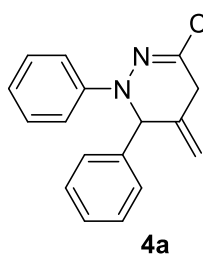

Prepared according to the general procedure as described above in 71% yield (45.5 mg). It was purified by flash chromatography (3.3 % EtOAc/PE) to afford a white solid. mp = 101 – 103 °C;  $^1\text{H}$  NMR (500 MHz,  $\text{CDCl}_3$ )  $\delta$  7.33 – 7.31 (m, 2H), 7.30 (d,  $J = 1.4$  Hz, 2H), 7.28 (s, 1H), 7.26 (s, 1H), 7.25 (d,  $J = 3.0$  Hz, 1H), 7.22 – 7.18 (m, 2H), 6.98 (tt,  $J = 7.0, 1.3$  Hz, 1H), 5.58 (s, 1H), 5.36 (d,  $J = 2.6$  Hz, 1H), 5.10 (d,  $J = 2.5$  Hz, 1H), 4.36 – 4.27 (m, 2H), 3.27 (dd,  $J = 19.5, 2.1$  Hz, 1H), 2.81 (dt,  $J = 19.4, 2.6$  Hz, 1H), 1.38 (t,  $J = 7.1$  Hz, 3H);  $^{13}\text{C}$  NMR (126 MHz,  $\text{CDCl}_3$ )  $\delta$  164.6, 145.6, 138.6, 136.5, 130.4, 129.1, 129.0, 127.8, 125.7, 122.2, 115.3, 112.2, 64.9, 61.1, 27.5, 14.4; IR (film)  $\nu_{\text{max}}$  2924, 2854, 2360, 1717, 1698, 1559, 1541, 1522, 1507, 1457  $\text{cm}^{-1}$ ; HRMS (ESI) calcd for  $\text{C}_{20}\text{H}_{21}\text{N}_2\text{O}_2^+$   $[\text{M}+\text{H}]^+$  321.1598; Found 321.1595.



### Ethyl 1-(3-chlorophenyl)-5-methylene-6-phenyl-1,4,5,6-tetrahydropyridazine-3-carboxylate

(4b)

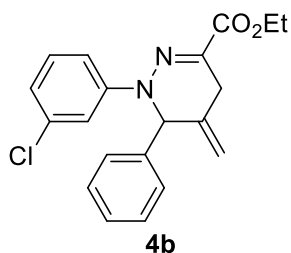

Prepared according to the general procedure as described above in 59% yield (41.9 mg). It was purified by flash chromatography (3.3 % EtOAc/PE) to afford a yellow oil.  $^1\text{H}$  NMR (500 MHz,  $\text{CDCl}_3$ )  $\delta$  7.36 (t,  $J = 2.2$  Hz, 1H), 7.34 – 7.30 (m, 2H), 7.30 – 7.26 (m, 1H), 7.19 – 7.14 (m, 3H), 7.12 (ddd,  $J = 8.4, 2.3, 1.1$  Hz, 1H), 6.94 (ddd,  $J = 7.8, 2.0, 1.1$  Hz, 1H), 5.54 (s, 1H), 5.38 (d,  $J = 2.5$  Hz, 1H), 5.12 (d,  $J = 2.4$  Hz, 1H), 4.37 – 4.28 (m, 2H), 3.28 (dd,  $J = 19.6, 2.0$  Hz, 1H), 2.80 (dt,  $J = 19.6, 2.6$  Hz, 1H), 1.39 (t,  $J = 7.1$  Hz, 3H);  $^{13}\text{C}$  NMR (126 MHz,  $\text{CDCl}_3$ )  $\delta$  164.3, 146.6, 138.0, 136.1, 135.0, 131.7, 130.0, 129.1, 128.0, 125.6, 122.1, 115.5, 113.1, 112.6, 64.7, 61.3, 27.4, 14.4; IR (film)  $\nu_{\text{max}}$  2923, 2850, 2362, 1716, 1699, 1588, 1569, 1559, 1480  $\text{cm}^{-1}$ ; HRMS (ESI) calcd for  $\text{C}_{20}\text{H}_{20}\text{ClN}_2\text{O}_2^+ [\text{M}+\text{H}]^+$  355.1208; Found 355.1202.

### Ethyl 5-methylene-6-phenyl-1-(p-tolyl)-1,4,5,6-tetrahydropyridazine-3-carboxylate (4c)

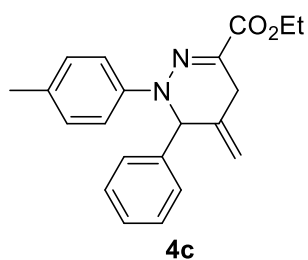

Prepared according to the general procedure as described above in 33% yield (21.9 mg). It was purified by flash chromatography (3.3 % EtOAc/PE) to afford a yellow solid. mp = 154 – 156 °C;  $^1\text{H}$  NMR (500 MHz,  $\text{CDCl}_3$ )  $\delta$  7.30 (dd,  $J = 8.2, 6.4$  Hz, 2H), 7.29 – 7.23 (m, 2H), 7.20 (d,  $J = 2.1$  Hz, 4H), 7.19 (s, 4H), 7.06 (d,  $J = 8.6$  Hz, 2H), 5.55 (d,  $J = 2.0$  Hz, 1H), 5.34 (d,  $J = 1.5$  Hz, 1H), 5.09 (d,  $J = 2.5$  Hz, 1H), 4.37 – 4.25 (m, 2H), 3.25 (dd,  $J = 19.4, 2.0$  Hz, 1H), 2.80 (dt,  $J = 19.4, 2.6$  Hz, 1H), 2.27 (s, 3H), 1.38 (t,  $J = 7.1$  Hz, 3H);  $^{13}\text{C}$  NMR (126 MHz,  $\text{CDCl}_3$ )  $\delta$  164.7, 143.4, 138.8, 136.6, 131.7, 129.7, 129.6, 129.0, 127.8, 125.7, 115.3, 112.1, 65.0, 61.0, 27.4, 20.6, 14.4; IR (film)  $\nu_{\text{max}}$  2923, 2359, 1697, 1569, 1559, 1509, 1248, 1159, 1098  $\text{cm}^{-1}$ ; HRMS (ESI) calcd for  $\text{C}_{21}\text{H}_{23}\text{N}_2\text{O}_2^+ [\text{M}+\text{H}]^+$  335.1754; Found 335.1752.

**Ethyl 5-methylene-1-phenyl-6-(4-(trifluoromethyl)phenyl)-1,4,5,6-tetrahydropyridazine-3-carboxylate (4d)**

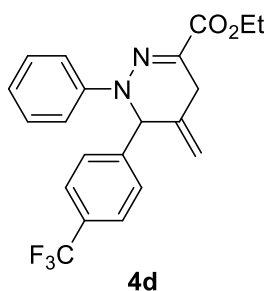

Prepared according to the general procedure as described above in 71% yield (55.1 mg). It was purified by flash chromatography (3.3 % EtOAc/PE) to afford a yellow solid. mp = 102 – 104 °C; <sup>1</sup>H NMR (500 MHz, CDCl<sub>3</sub>) δ 7.58 (d, *J* = 8.2 Hz, 2H), 7.33 (d, *J* = 8.1 Hz, 2H), 7.28 (d, *J* = 3.8 Hz, 2H), 7.26 (d, *J* = 6.6 Hz, 2H), 7.03 – 6.97 (m, 1H), 5.63 (d, *J* = 2.0 Hz, 1H), 5.41 (d, *J* = 2.6 Hz, 1H), 5.17 (d, *J* = 2.5 Hz, 1H), 4.38 – 4.27 (m, 2H), 3.30 (dd, *J* = 19.7, 2.0 Hz, 1H), 2.75 (dt, *J* = 19.7, 2.6 Hz, 1H), 1.39 (t, *J* = 7.1 Hz, 3H); <sup>13</sup>C NMR (126 MHz, CDCl<sub>3</sub>) δ 164.4, 145.3, 135.8, 130.8, 130.3 (C-F, <sup>2</sup>*J*<sub>C-F</sub> = 32.4 Hz), 129.2, 126.2, 126.1 (C-F, <sup>3</sup>*J*<sub>C-F</sub> = 3.7 Hz), 122.5, 115.2, 113.2, 64.4, 61.2, 27.4, 14.4; <sup>19</sup>F NMR (471 MHz, CDCl<sub>3</sub>) δ -62.59; IR (film)  $\nu_{\max}$  2981, 2359, 1698, 1575, 1497, 1323, 1249, 1152, 1099 cm<sup>-1</sup>; HRMS (ESI) calcd for C<sub>21</sub>H<sub>20</sub>F<sub>3</sub>N<sub>2</sub>O<sub>2</sub><sup>+</sup> [M+H]<sup>+</sup> 389.1471; Found 389.1471.

**(E)-2-methylene-1,4-diphenyl-4-(2-tosylhydrazineylidene)butyl benzoate (5)**

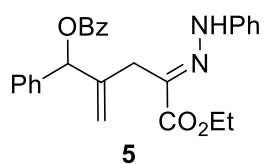

Prepared according to the general procedure as described above in 52% yield (22.9 mg). It was purified by flash chromatography (10.0 – 12.5 % EtOAc/PE) to afford a yellow oil. <sup>1</sup>H NMR (500 MHz, CDCl<sub>3</sub>) δ 8.14 (dd, *J* = 8.3, 1.3 Hz, 2H), 8.01 (s, 1H), 7.61 – 7.58 (m, 1H), 7.54 (d, *J* = 1.8 Hz, 1H), 7.53 (s, 1H), 7.50 – 7.46 (m, 2H), 7.46 (d, *J* = 1.7 Hz, 1H), 7.45 – 7.41 (m, 2H), 7.41 – 7.38 (m, 1H), 7.29 – 7.27 (m, 1H), 7.15 – 7.12 (m, 2H), 6.97 – 6.94 (m, 1H), 6.38 (s, 1H), 5.38 (s, 1H), 4.98 (t, *J* = 1.6 Hz, 1H), 4.30 – 4.26 (m, 2H), 3.53 (dt, *J* = 17.6, 2.0 Hz, 1H), 3.35 (d, *J* = 17.7 Hz, 1H), 1.34 (t, *J* = 7.1 Hz, 3H); <sup>13</sup>C NMR (126 MHz, CDCl<sub>3</sub>) δ 166.1, 165.2, 143.2, 140.3, 137.6, 133.5, 131.6, 129.8, 129.8, 129.2, 129.0, 128.8, 128.6, 127.0, 122.1, 114.1, 113.1, 78.9, 61.3, 28.8, 14.3; IR (film)  $\nu_{\max}$  2926, 2360, 1717, 1698, 1559, 1541, 1522, 1507, 1457 1246, 1102 cm<sup>-1</sup>; HRMS (ESI) calcd for C<sub>27</sub>H<sub>27</sub>N<sub>2</sub>O<sub>4</sub><sup>+</sup> [M+H]<sup>+</sup> 443.1965; Found 443.1965.

### Ethyl (2E,4E(z))-5-phenyl-2-(2-phenylhydrazineylidene)pent-4-enoate (5-2)

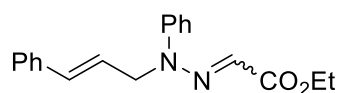

**5-2**

Prepared according to the general procedure as described above in 85% yield (25.9 mg). It was purified by flash chromatography (10.0 % EtOAc/PE) to afford a colorless oil. <sup>1</sup>H NMR (500 MHz, CDCl<sub>3</sub>) δ 7.36 – 7.33 (m, 2H), 7.27 (dd, J = 7.0, 1.8 Hz, 2H), 7.23 (dd, J = 4.0, 1.2 Hz, 2H), 7.21 – 7.18 (m, 2H), 7.17 – 7.15 (m, 1H), 6.99 (tt, J = 7.3, 1.1 Hz, 1H), 6.74 (s, 1H), 6.32 (dt, J = 16.1, 2.0 Hz, 1H), 6.07 (dd, J = 16.1, 4.3 Hz, 1H), 4.56 (dd, J = 4.4, 2.0 Hz, 2H), 4.21 (q, J = 7.1 Hz, 2H), 1.26 (t, J = 7.1 Hz, 3H); <sup>13</sup>C NMR (126 MHz, CDCl<sub>3</sub>) δ 164.8, 146.4, 136.0, 132.1, 129.3, 128.7, 128.1, 126.5, 123.5, 121.8, 119.6, 116.9, 114.1, 60.7, 49.9, 14.4; IR (film)  $\nu_{\max}$  3028, 2980, 1695, 1550, 1493, 1314, 1266, 1236, 1137, 1096 cm<sup>-1</sup>; HRMS (ESI) calcd for C<sub>19</sub>H<sub>21</sub>N<sub>2</sub>O<sub>2</sub><sup>+</sup> [M+H]<sup>+</sup> 309.1598; Found 309.1596.

### 2-(((tert-butoxycarbonyloxy)methyl)-1-phenylallyl benzoate (6)

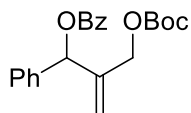

**6**

Prepared according to the general procedure as described above in 50% yield (185.3 mg). It was purified by flash chromatography (3.3% EtOAc/PE) to afford a white solid. mp = 89 – 91 °C; <sup>1</sup>H NMR (500 MHz, CDCl<sub>3</sub>) δ 8.12 – 8.09 (m, 2H), 7.59 – 7.55 (m, 1H), 7.47 – 7.43 (m, 4H), 7.36 (t, J = 7.4 Hz, 2H), 7.33 – 7.29 (m, 1H), 6.59 (s, 1H), 5.44 (s, 1H), 5.41 (s, 1H), 4.62 (d, J = 13.4 Hz, 1H), 4.51 (d, J = 13.4 Hz, 1H), 1.44 (s, 9H); <sup>13</sup>C NMR (126 MHz, CDCl<sub>3</sub>) δ 165.2, 153.2, 141.9, 137.8, 133.2, 130.1, 129.8, 128.6, 128.5, 128.4, 127.2, 115.9, 82.3, 76.1, 66.4, 27.7; IR (film)  $\nu_{\max}$  2980, 2359, 1743, 1724, 1457, 1255, 1159, 1106 cm<sup>-1</sup>; HRMS (ESI) calcd for C<sub>22</sub>H<sub>24</sub>NaO<sub>5</sub><sup>+</sup> [M+Na]<sup>+</sup> 391.1516; Found 391.1512.

### tert-butyl (2-(methoxy(phenyl)methyl)allyl) carbonate (6-1)

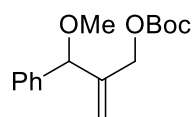

**6-1**

To a 50 mL round-bottom flask charged with NaH (60% in mineral oil, 1.8 equiv) at 0 °C was added a solution of hydroxy-tethered allylic carbonate **1a** (528.6 mg, 2 mmol, 1 equiv) in dry THF (20 mL). The suspension was stirred at 0 °C for over 1 h, and MeI (2.5 equiv) was added. The reaction was allowed to warm up to room temperature, the starting material was monitored by TLC until its complete consumption. The crude product was purified by flash chromatography (3.3% EtOAc/PE) to afford a colorless oil. Prepared according to the general procedure as described above in 30% yield (166.9 mg). <sup>1</sup>H NMR (500 MHz, CDCl<sub>3</sub>) δ 7.26 (d, J = 3.7 Hz, 4H), 7.22 – 7.18 (m, 1H), 5.21 (dp, J = 3.5, 1.2 Hz, 2H), 4.66 (s, 1H), 4.49 (d, J = 13.7 Hz, 1H), 4.29 (d, J = 13.7 Hz, 1H), 3.26 (s, 3H), 1.39 (s, 9H); <sup>13</sup>C NMR (126 MHz, CDCl<sub>3</sub>) δ 153.3, 143.6, 139.4, 128.4, 127.8, 126.9, 114.4, 84.1, 82.1, 66.2, 56.8, 27.8; IR (film)  $\nu_{\max}$  2980, 2935, 1742, 1454, 1394, 1369, 1275, 1254, 1161, 1094 cm<sup>-1</sup>; HRMS (ESI) calcd for C<sub>16</sub>H<sub>23</sub>O<sub>4</sub><sup>+</sup> [M+H]<sup>+</sup> 279.1591; Found 279.1593.

**Ethyl (E)-4-(hydroxymethyl)-2-(2-phenylhydrazineylidene)pent-4-enoate (8)**

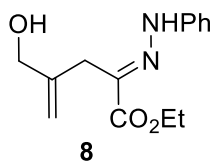

Prepared according to the general procedure as described above in 59% yield (15.5 mg). It was purified by flash chromatography (10.0 – 12.5 % EtOAc/PE) to afford a white solid. mp = 91 – 93 °C; <sup>1</sup>H NMR (500 MHz, CDCl<sub>3</sub>) δ 8.99 (s, 1H), 7.31 – 7.27 (m, 2H), 7.18 (d, *J* = 7.4 Hz, 2H), 6.96 (t, *J* = 7.3 Hz, 1H), 5.14 (s, 1H), 5.08 (s, 1H), 4.32 (q, *J* = 7.1 Hz, 2H), 4.13 (d, *J* = 5.3 Hz, 2H), 3.48 (s, 2H), 2.34 (t, *J* = 5.5 Hz, 1H), 1.39 (t, *J* = 7.1 Hz, 3H); <sup>13</sup>C NMR (126 MHz, CDCl<sub>3</sub>) δ 165.8, 143.3, 142.7, 132.6, 129.3, 122.0, 114.8, 114.0, 66.2, 61.4, 28.6, 14.3; IR (film)  $\nu_{\max}$  2927, 2359, 1698, 1559, 1541, 1507, 1497, 1240, 1188, 1099 cm<sup>-1</sup>; HRMS (ESI) calcd for C<sub>14</sub>H<sub>19</sub>N<sub>2</sub>O<sub>3</sub><sup>+</sup> [M+H]<sup>+</sup> 263.139; Found 263.1385.

**(E)-N'-(3-(hydroxy(phenyl)methyl)-1-phenylbut-3-en-1-ylidene)-4-methylbenzenesulfonylhydrazide (10)**

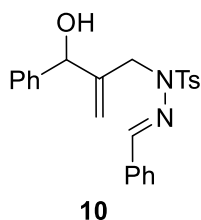

Prepared according to the general procedure as described above in 98% yield (41.2 mg). It was purified by flash chromatography (12.5 – 20.0% EtOAc/PE) to afford a colorless oil. <sup>1</sup>H NMR (500 MHz, CDCl<sub>3</sub>) δ 7.77 (d, *J* = 8.3 Hz, 2H), 7.44 (d, *J* = 7.2 Hz, 2H), 7.41 (d, *J* = 4.2 Hz, 2H), 7.39 (s, 1H), 7.38 – 7.32 (m, 2H), 7.32 – 7.29 (m, 3H), 7.27 (s, 1H), 7.25 (s, 1H), 7.09 (s, 1H), 5.37 (s, 1H), 5.34 (s, 1H), 5.16 (s, 1H), 4.33 (d, *J* = 17.5 Hz, 1H), 4.11 (d, *J* = 17.6 Hz, 1H), 2.55 (s, 1H), 2.38 (s, 3H); <sup>13</sup>C NMR (126 MHz, CDCl<sub>3</sub>) δ 144.8, 144.1, 143.6, 141.2, 134.7, 134.1, 129.9, 129.6, 128.7, 128.6, 128.11, 128.08, 127.3, 126.3, 113.2, 75.7, 48.5, 21.6; IR (film)  $\nu_{\max}$  3503, 918, 1355, 1186, 1166, 1090, 1059, 923 cm<sup>-1</sup>; HRMS (ESI) calcd for C<sub>24</sub>H<sub>25</sub>N<sub>2</sub>O<sub>3</sub>S<sup>+</sup> [M+H]<sup>+</sup> 421.1580; Found 421.1575.

**Ethyl (Z)-2-(2-(2-(hydroxy(phenyl)methyl)allyl)-2-phenylhydrazineylidene)propanoate (12)**

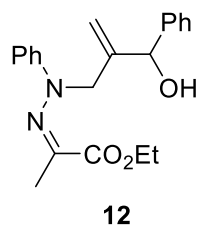

Prepared according to the general procedure as described above in 24% yield (8.6 mg). It was purified by flash chromatography (10.0% EtOAc/PE) to afford a yellow oil. <sup>1</sup>H NMR (500 MHz, CDCl<sub>3</sub>) δ 7.35 (d, *J* = 7.3 Hz, 2H), 7.26 (t, *J* = 7.6 Hz, 2H), 7.21 – 7.16 (m, 3H), 6.99 (t, *J* = 7.4 Hz, 1H), 6.86 (d, *J* = 7.6 Hz, 2H), 5.25 (d, *J* = 3.9 Hz, 1H), 5.15 (s, 1H), 4.82 (s, 1H), 4.66 (d, *J* = 5.1 Hz, 1H), 4.26 (p, *J* = 7.0 Hz, 2H), 4.13 (d, *J* = 15.1 Hz, 1H), 4.00 (d, *J* = 15.0 Hz, 1H), 1.59 (s, 3H), 1.34 (t, *J* = 7.1 Hz, 3H); <sup>13</sup>C NMR (126 MHz, CDCl<sub>3</sub>) δ 165.0, 148.1, 146.6, 144.1, 142.7, 129.1, 128.2, 127.2, 126.3, 124.4, 122.0, 117.6, 76.4, 61.7, 60.8, 16.6, 14.3; IR (film)  $\nu_{\max}$  3392, 2980, 2924, 1702, 1593, 1577, 1490, 1273, 1129, 1025 cm<sup>-1</sup>; HRMS (ESI) calcd for C<sub>21</sub>H<sub>25</sub>N<sub>2</sub>O<sub>3</sub><sup>+</sup> [M+H]<sup>+</sup> 353.1860; Found 353.1860.

## 5. $^1\text{H}$ , $^{13}\text{C}$ and $^{19}\text{F}$ NMR Spectra of All Products

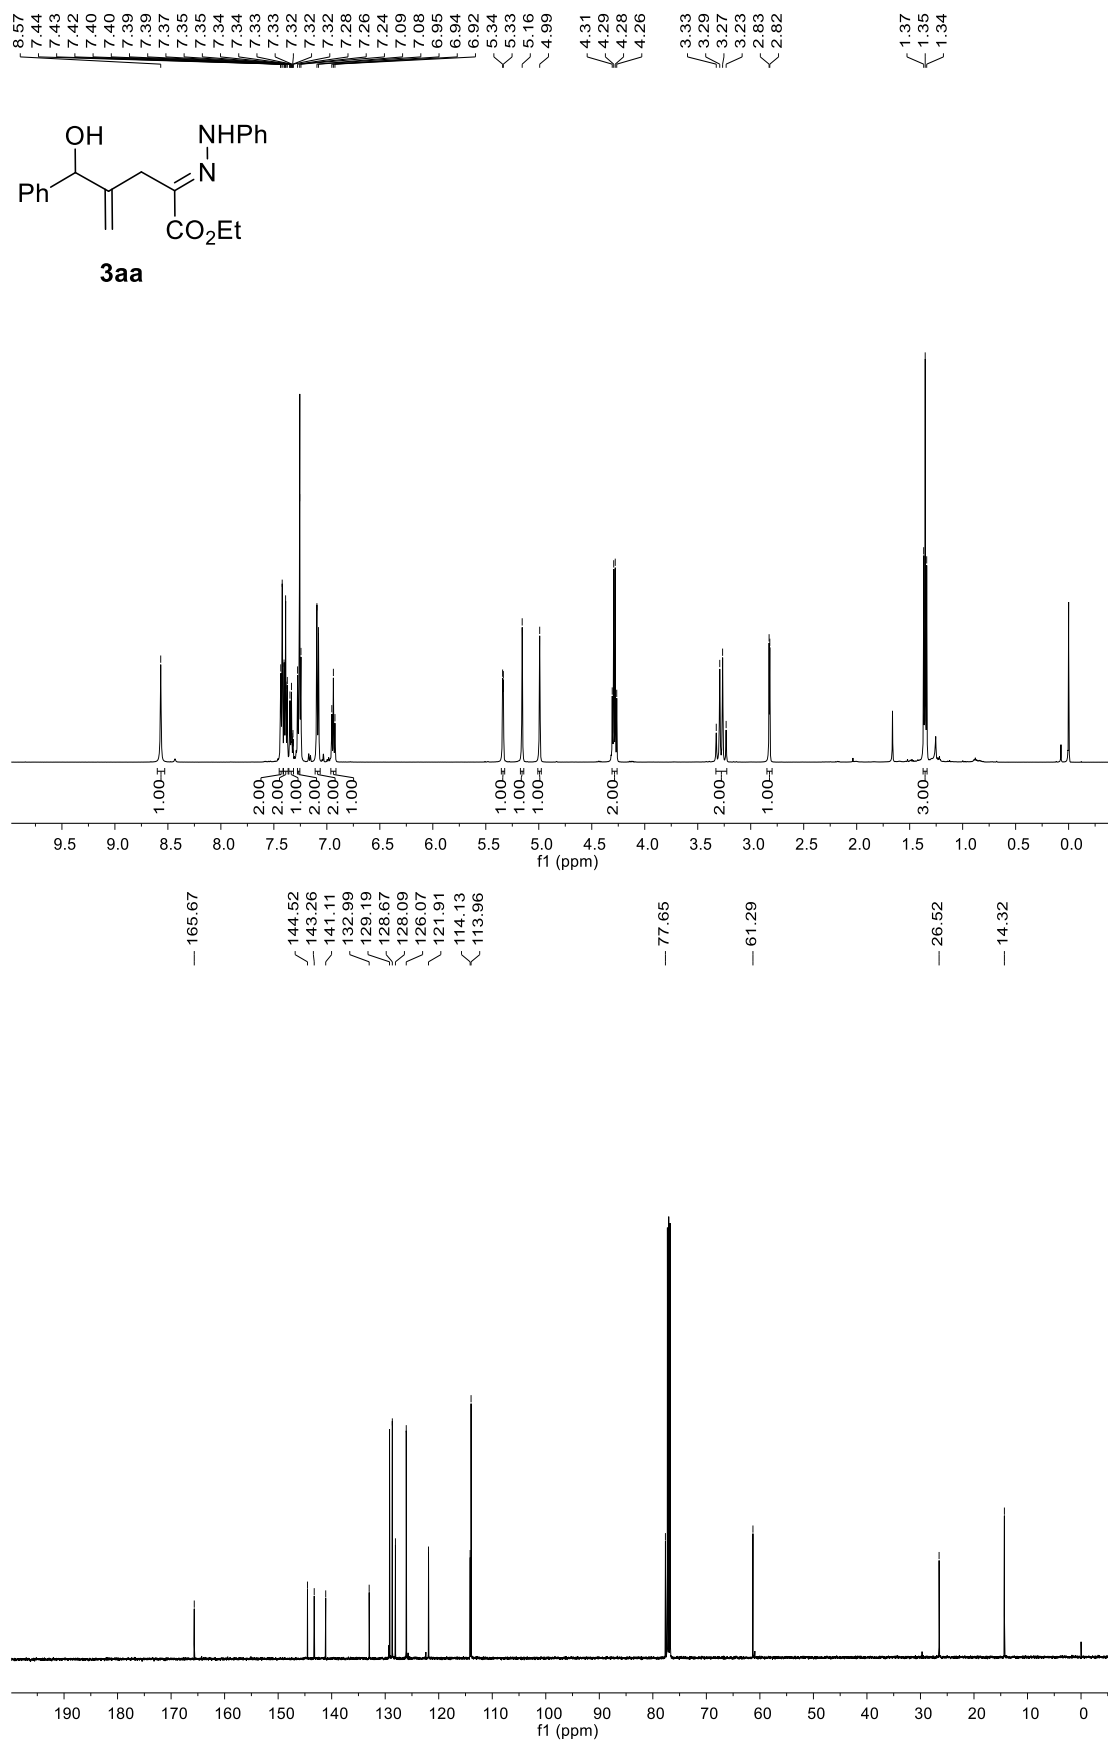

8.64  
7.40  
7.39  
7.39  
7.39  
7.38  
7.38  
7.37  
7.37  
7.36  
7.36  
7.36  
7.28  
7.28  
7.27  
7.27  
7.26  
7.25  
7.12  
7.11  
7.11  
7.10  
7.10  
7.10  
7.07  
7.07  
7.06  
7.05  
7.05  
7.04  
7.04  
6.97  
6.96  
6.96  
6.95  
6.95  
6.95  
6.94  
6.94  
6.93  
6.93  
5.31  
5.31  
5.12  
5.12  
5.02  
5.02  
4.30  
4.29  
4.27  
4.26  
3.31  
3.28  
3.27  
3.23  
2.96  
2.96  
1.37  
1.35  
1.34

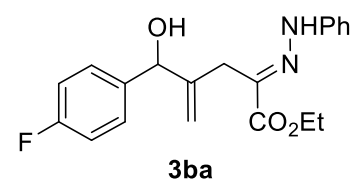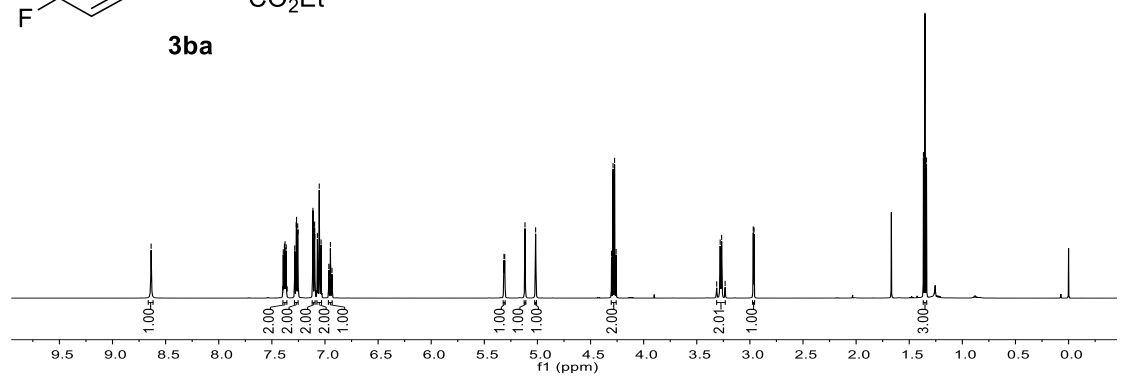

165.72  
163.45  
161.49  
144.66  
143.24  
136.80  
136.77  
132.87  
129.27  
127.87  
127.80  
122.04  
115.56  
115.39  
114.58  
113.98

-76.96  
-61.36  
-26.65  
-14.32

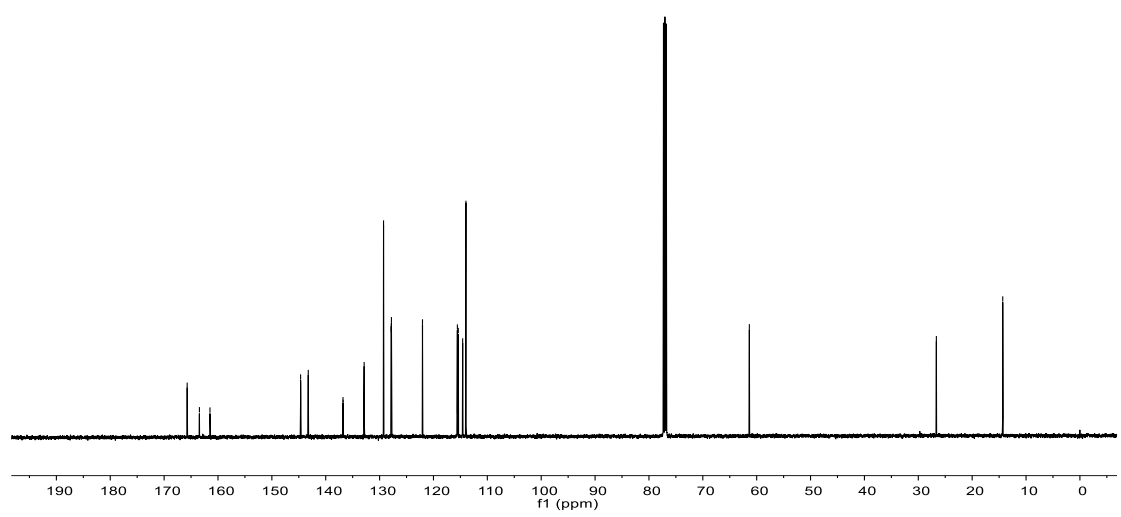

-114.23

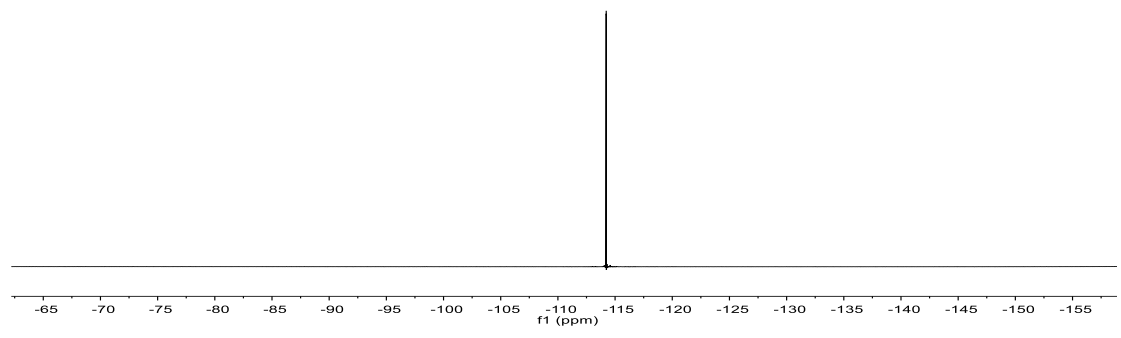

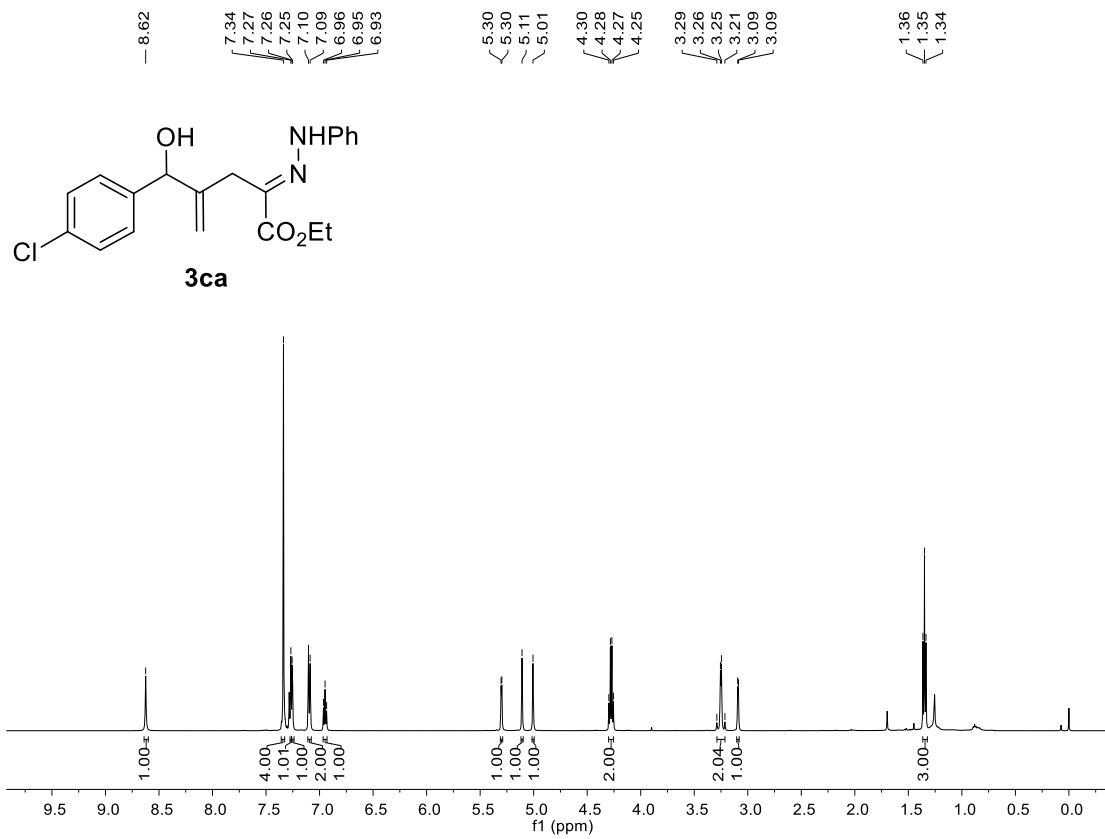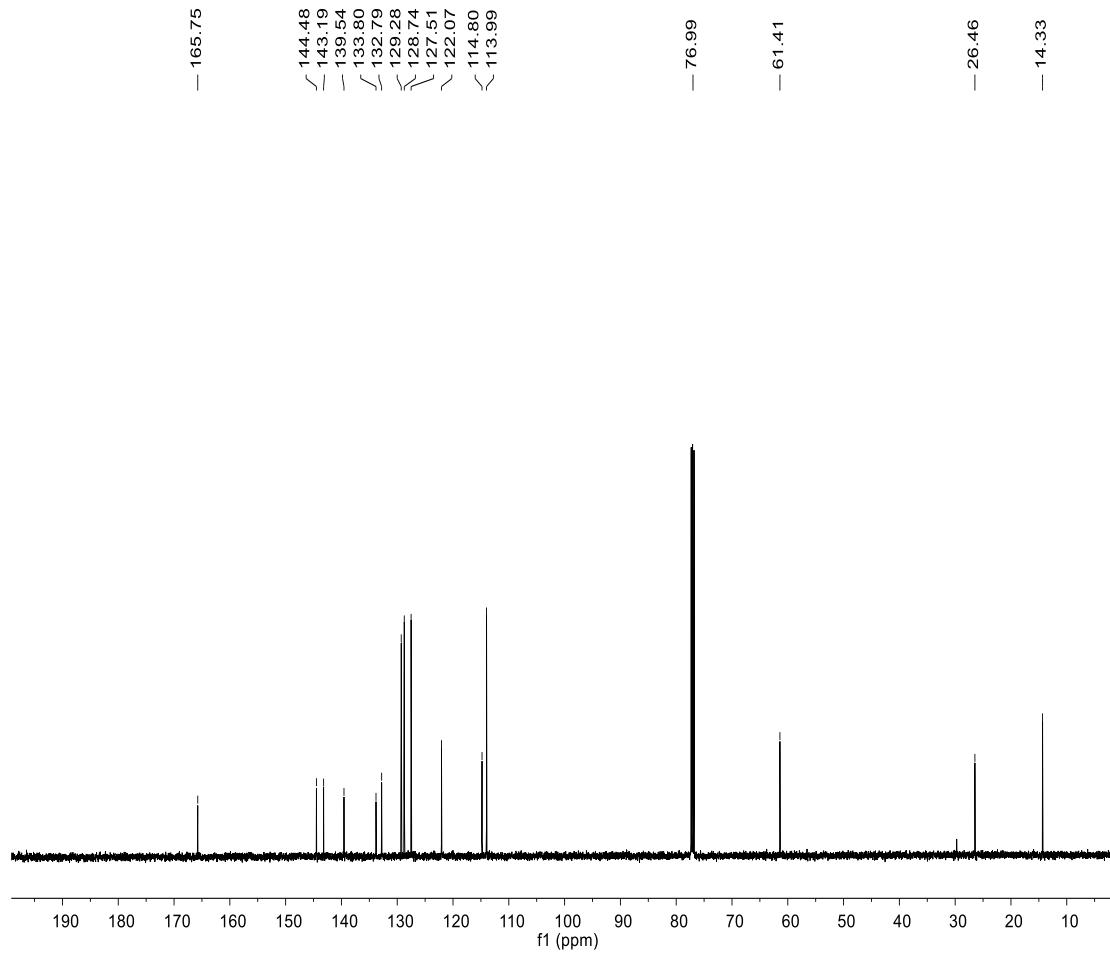

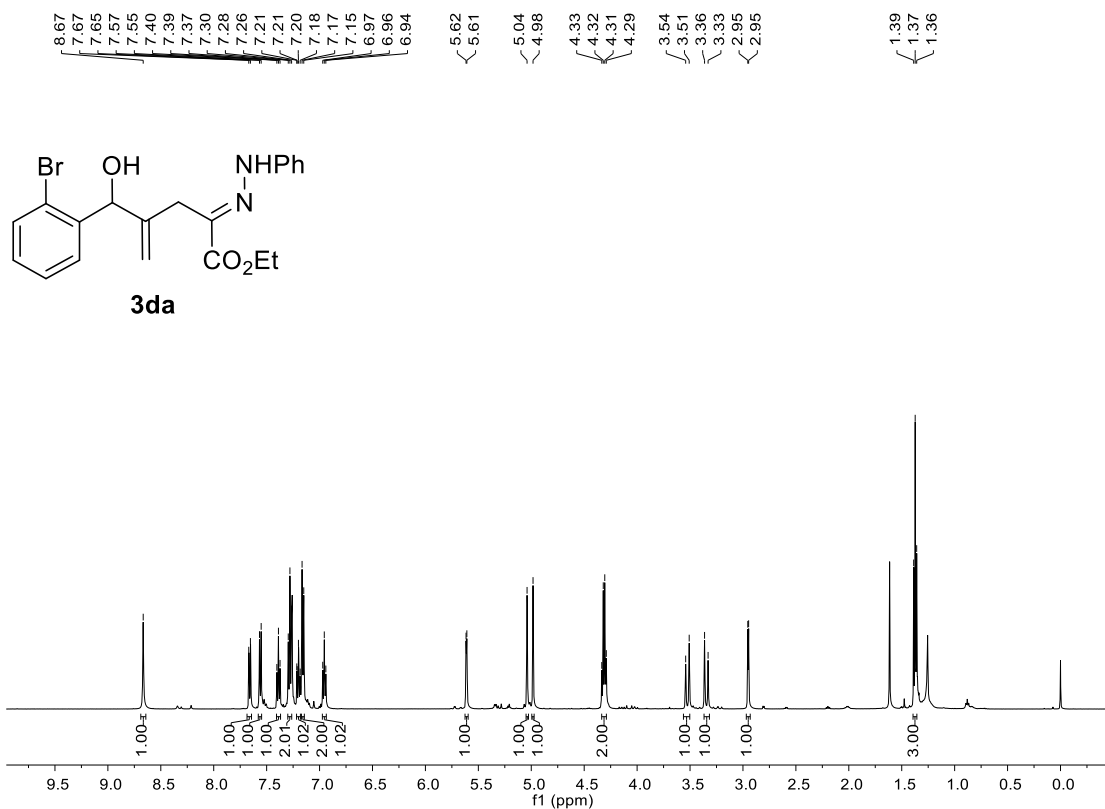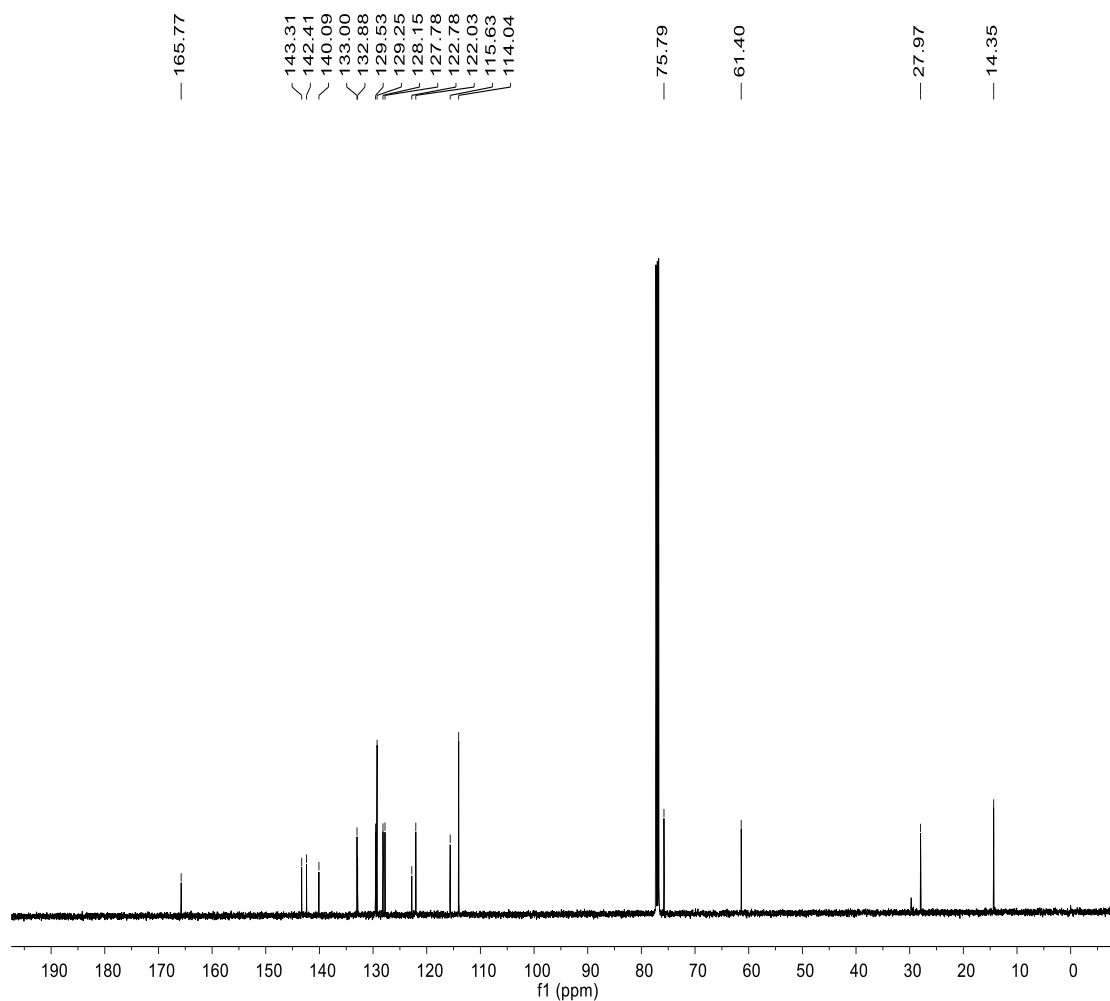



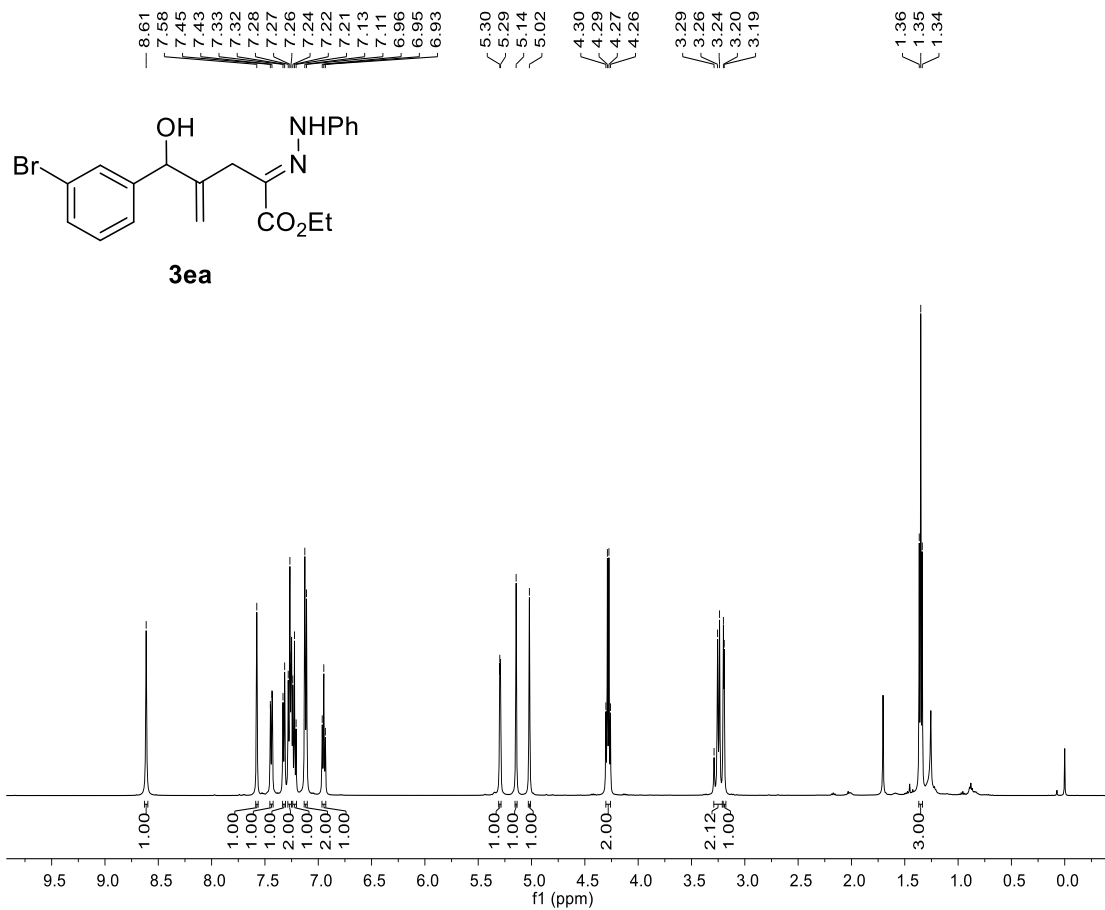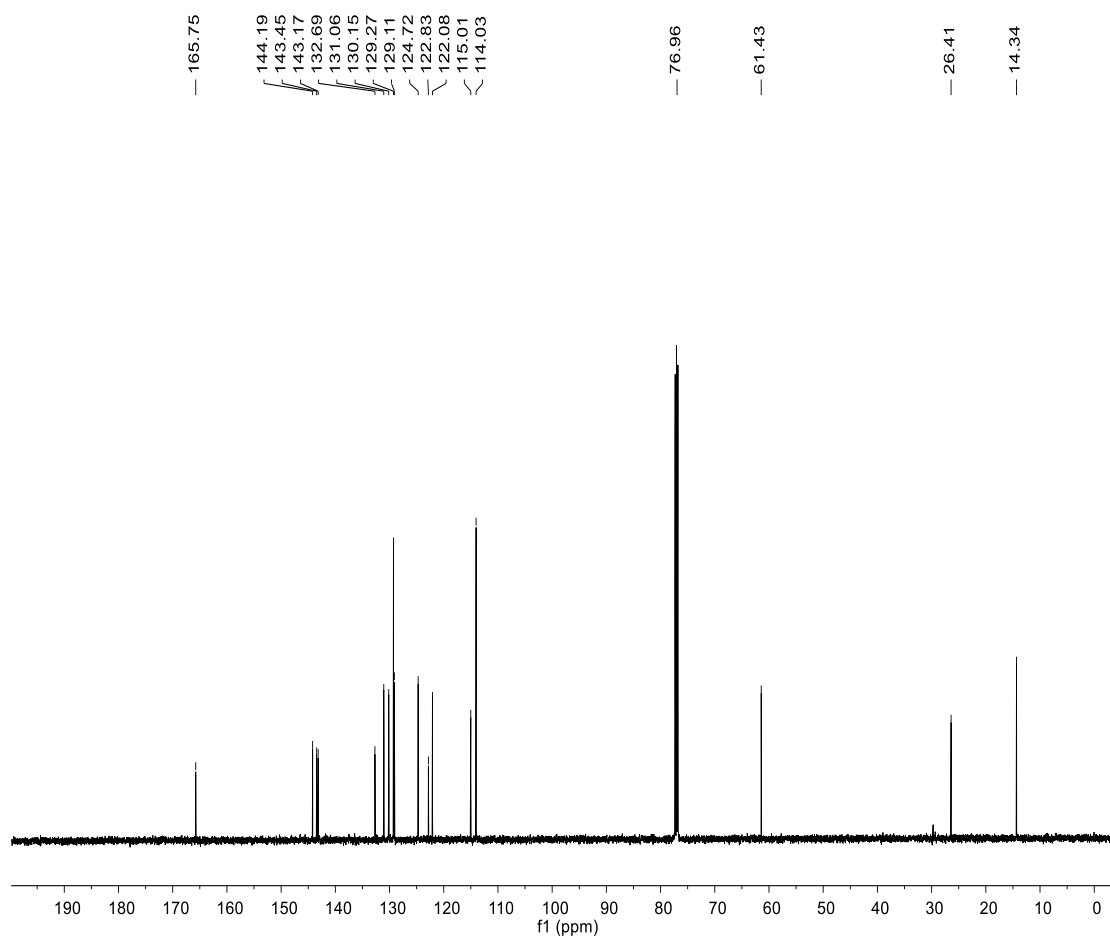

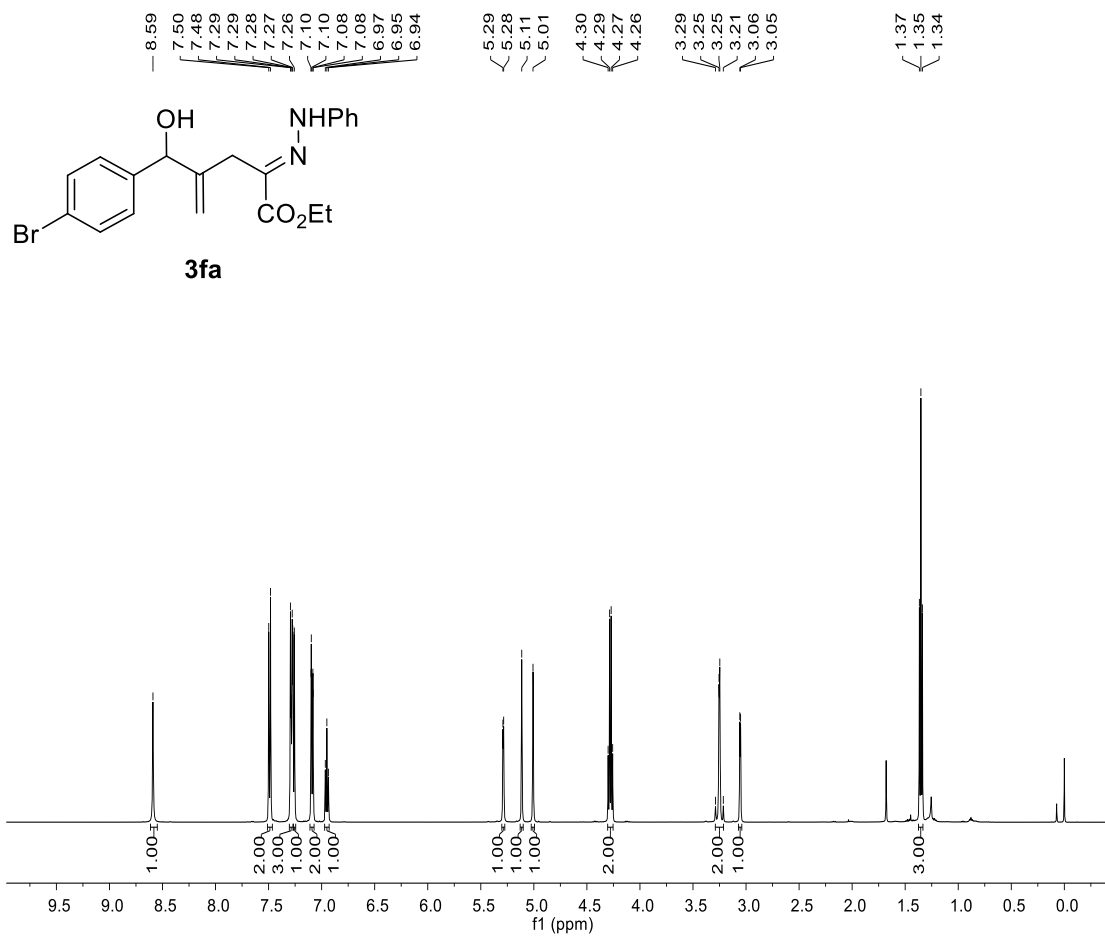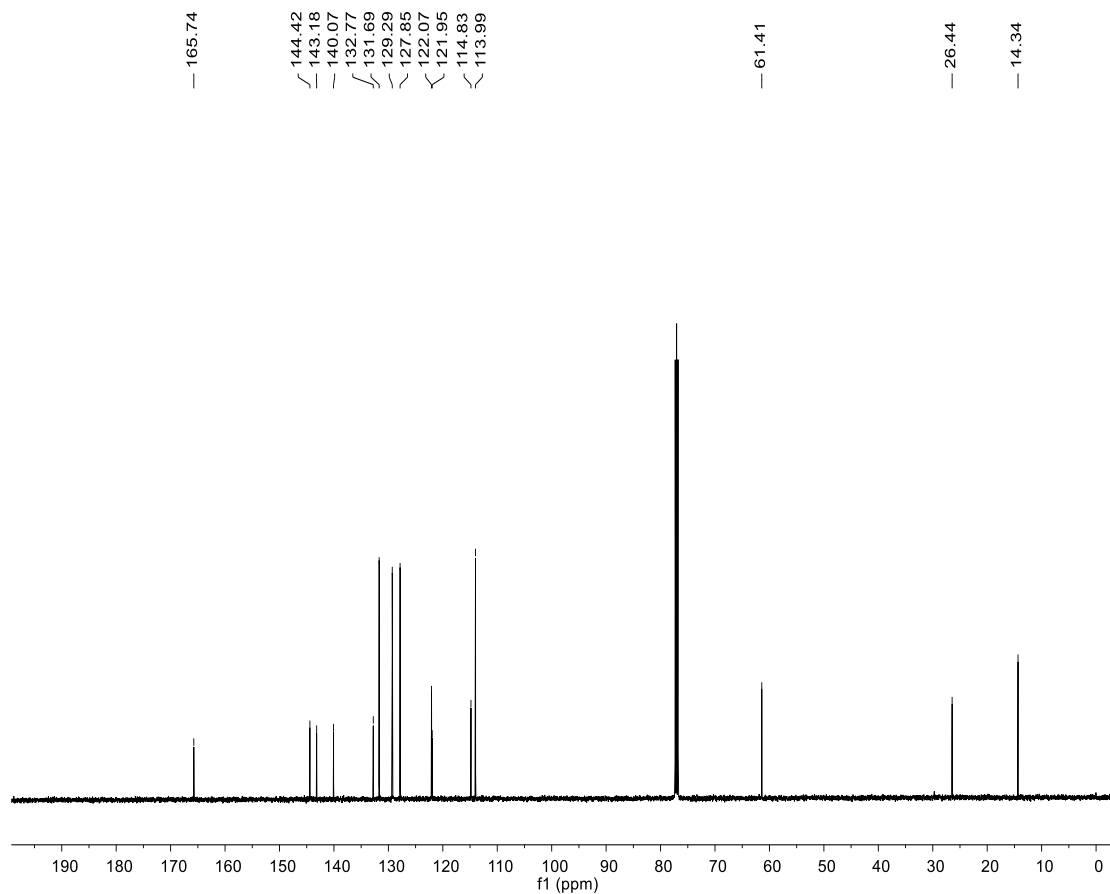

8.83  
7.58  
7.57  
7.56  
7.56  
7.28  
7.27  
7.25  
7.23  
7.22  
7.22  
7.17  
7.16  
7.15  
7.15  
7.13  
7.13  
6.96  
6.95  
6.95  
6.94  
6.94  
6.93  
6.92  
5.46  
5.45  
5.00  
4.96  
4.31  
4.29  
4.28  
4.26  
3.41  
3.38  
3.29  
3.26  
2.77  
2.76  
— 2.26  
1.37  
1.35  
1.34

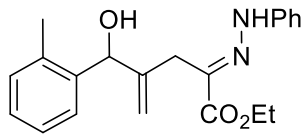

**3ga**

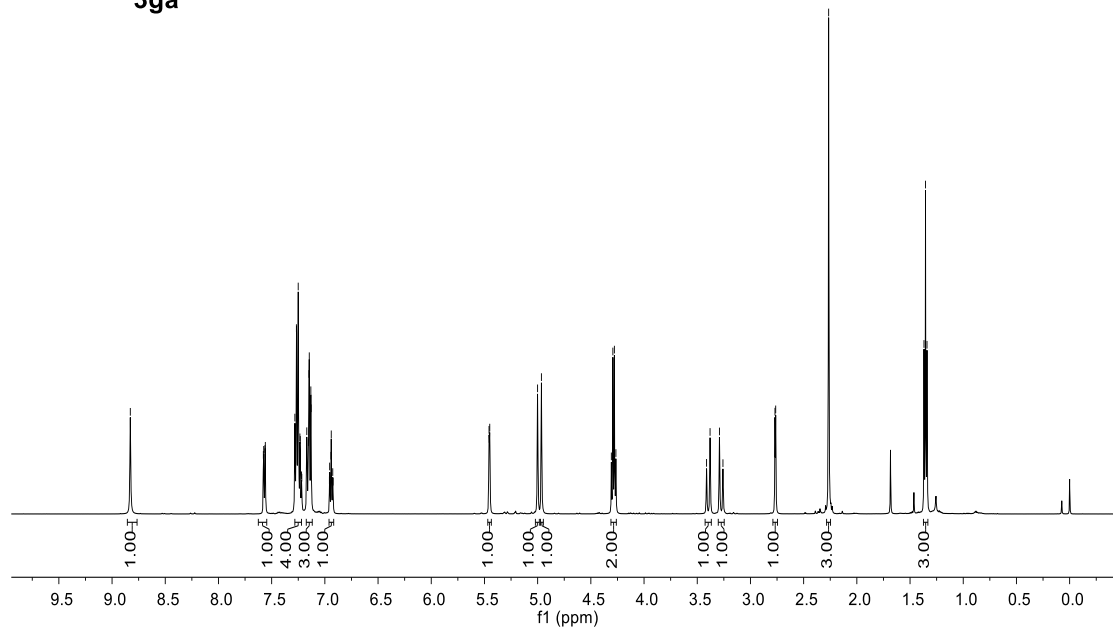

— 165.76  
143.40  
143.15  
138.97  
135.48  
133.16  
130.74  
129.24  
127.97  
126.35  
125.72  
121.91  
114.81  
113.98  
— 74.36  
— 61.32  
— 27.20  
— 19.18  
— 14.35

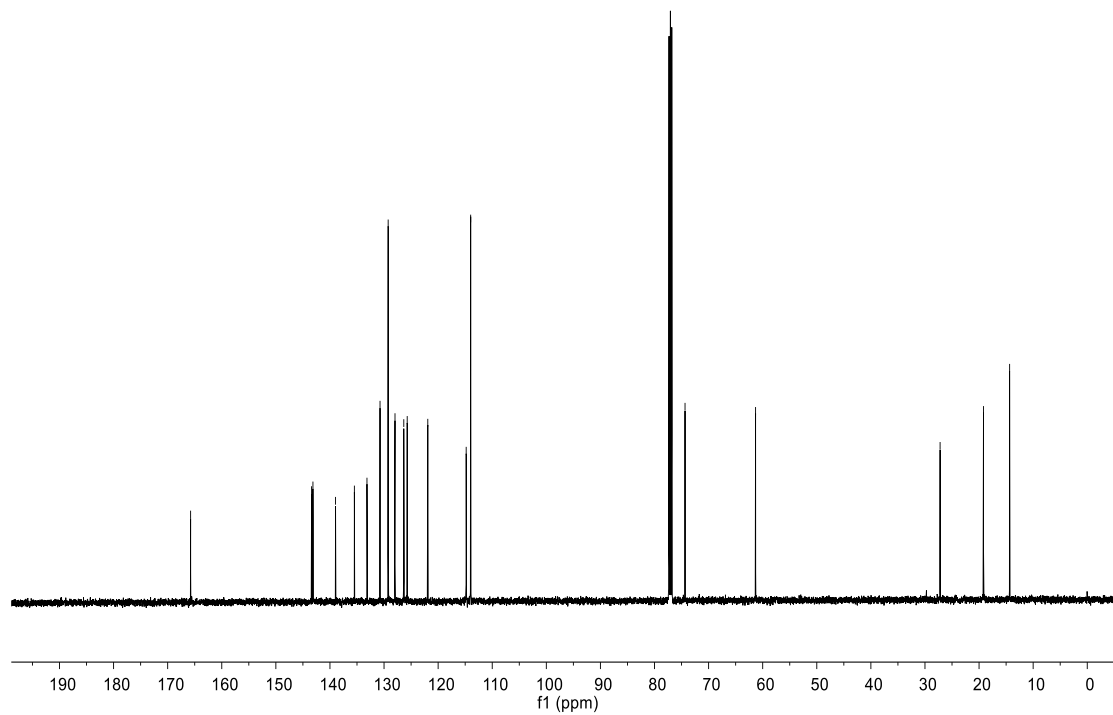

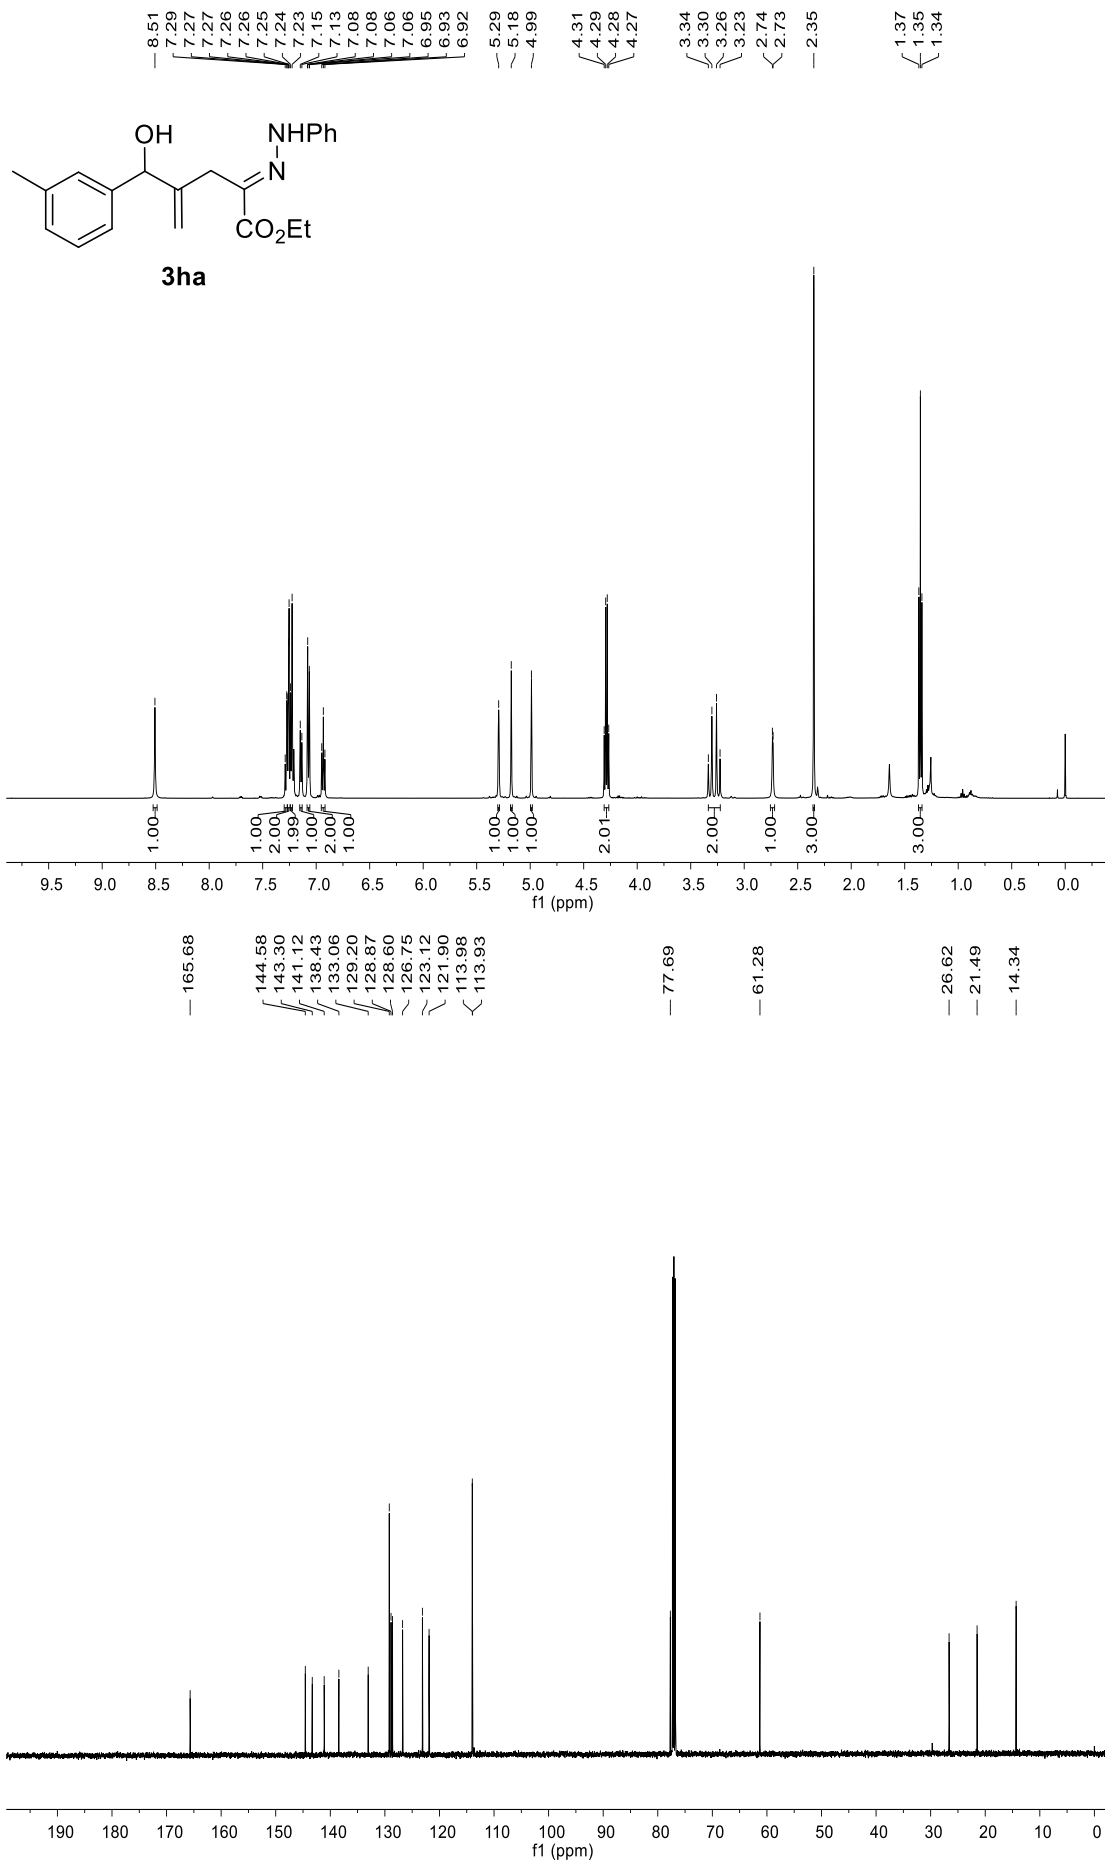

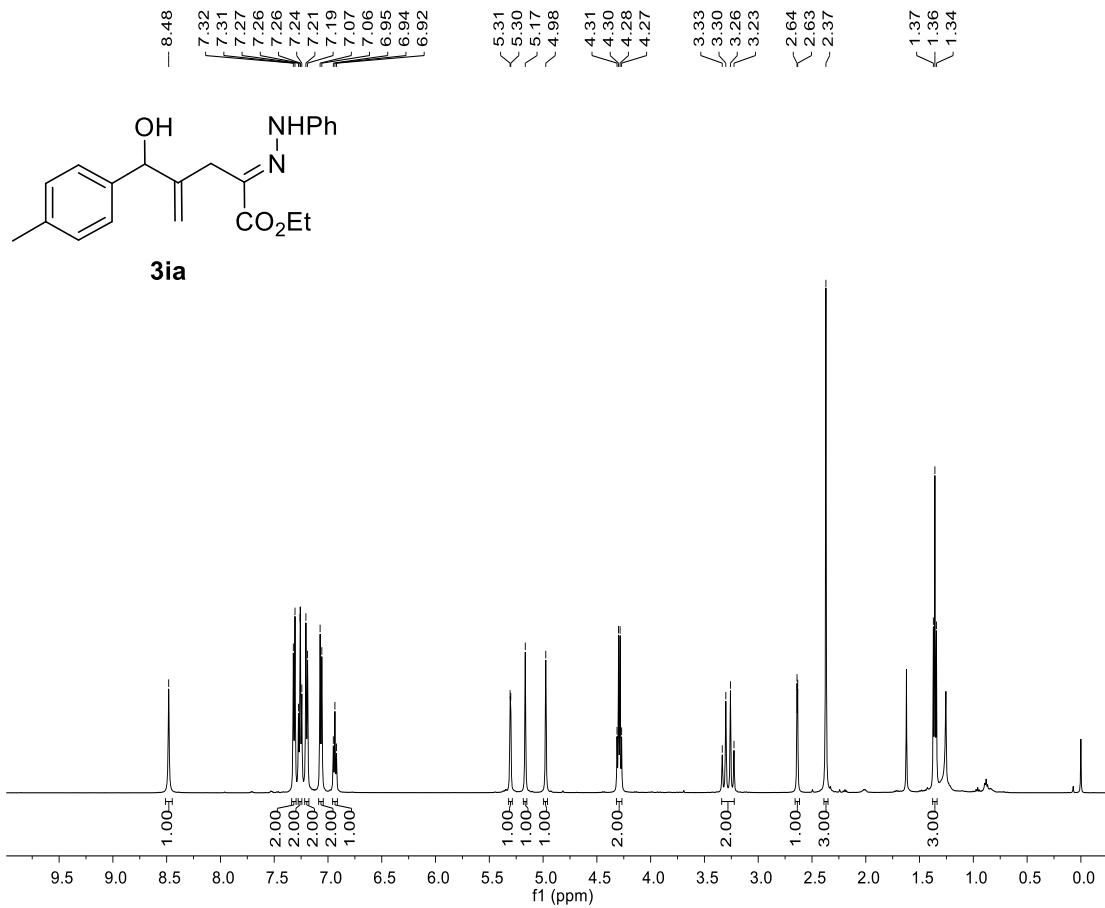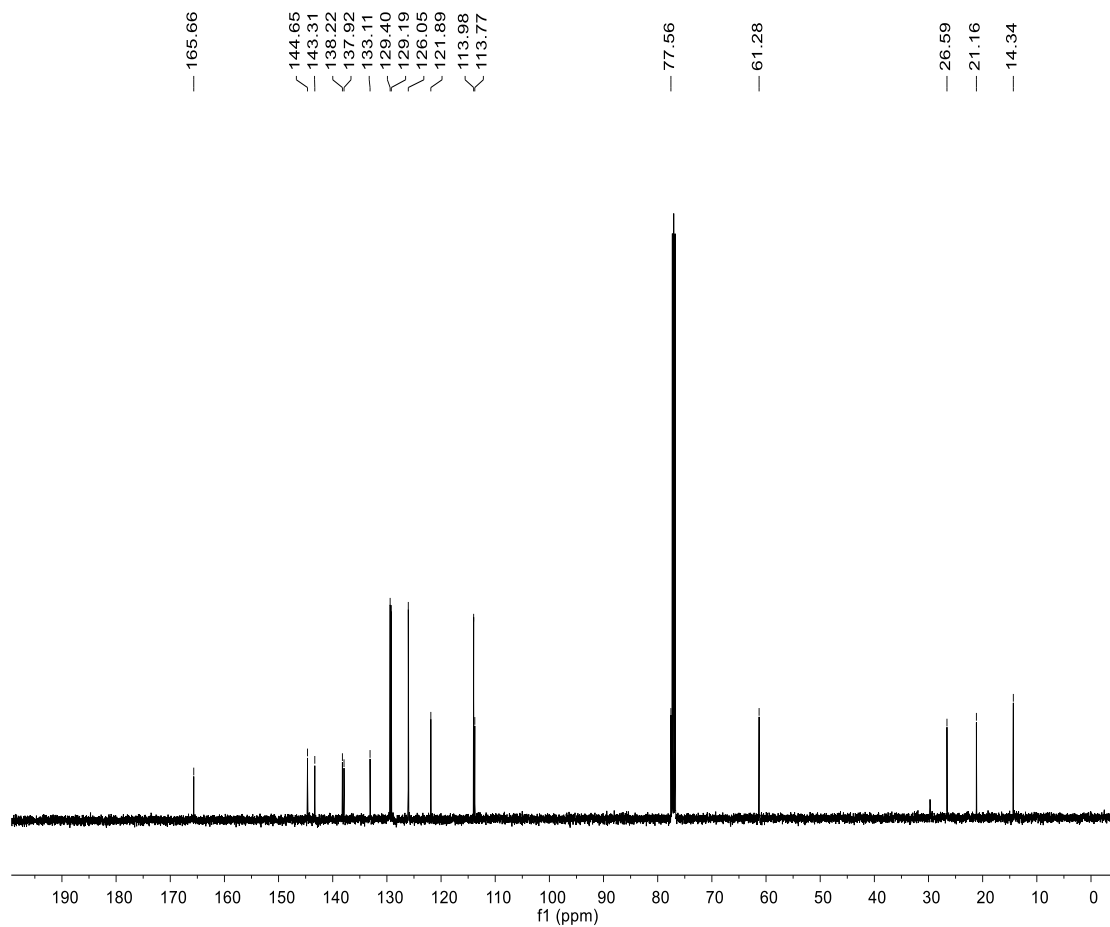

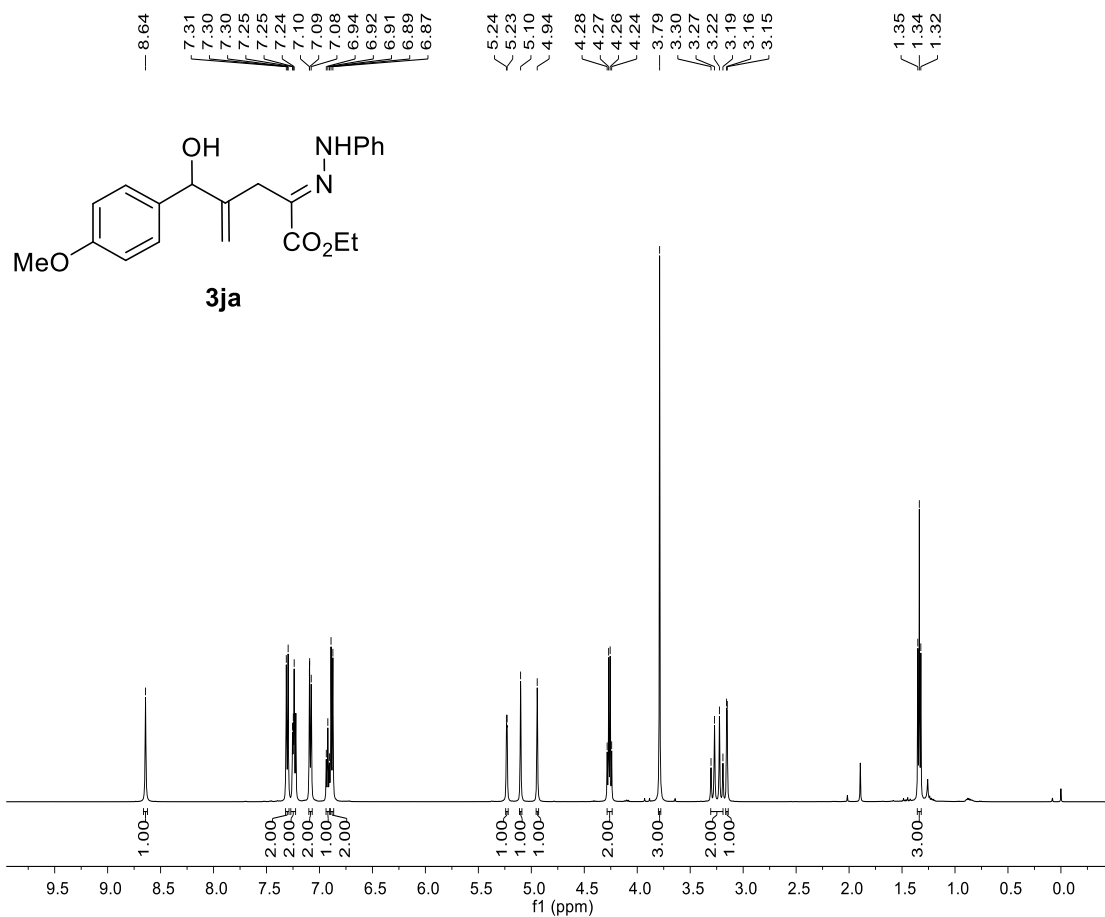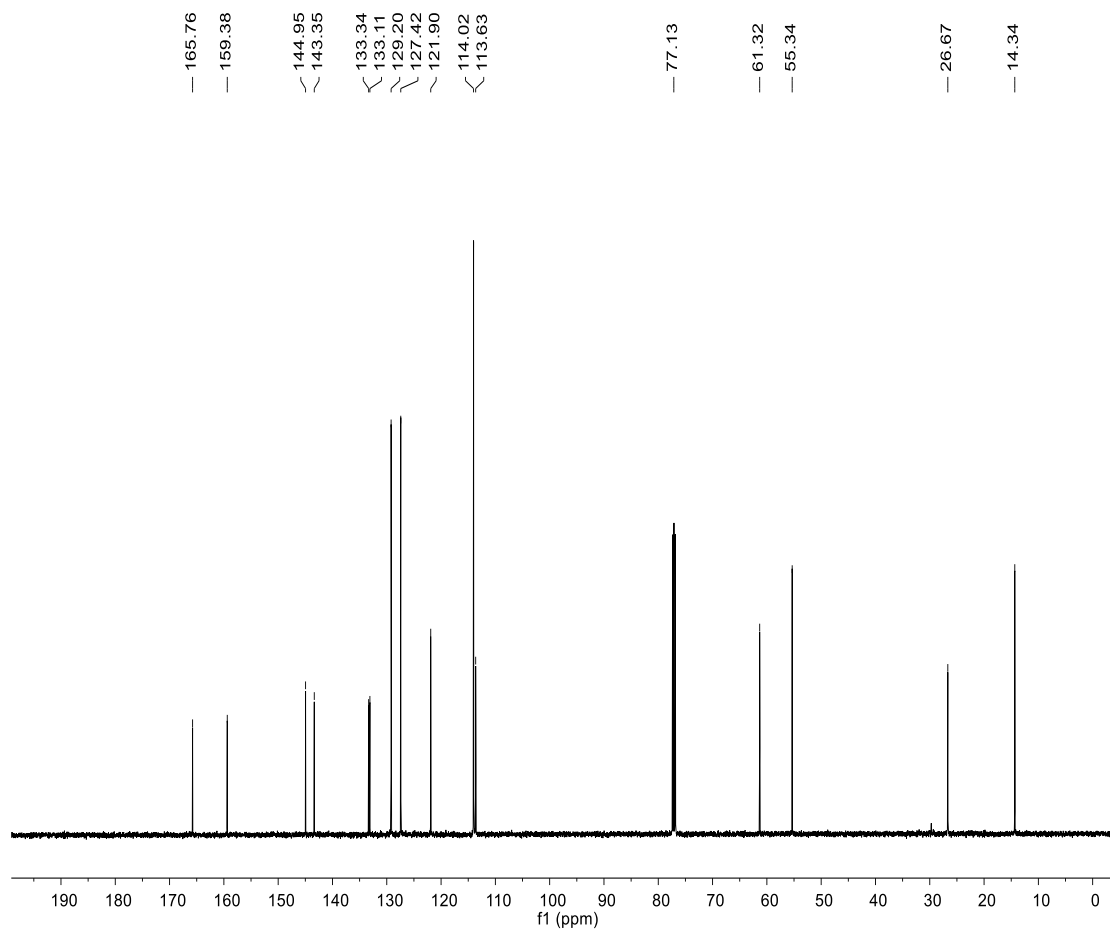

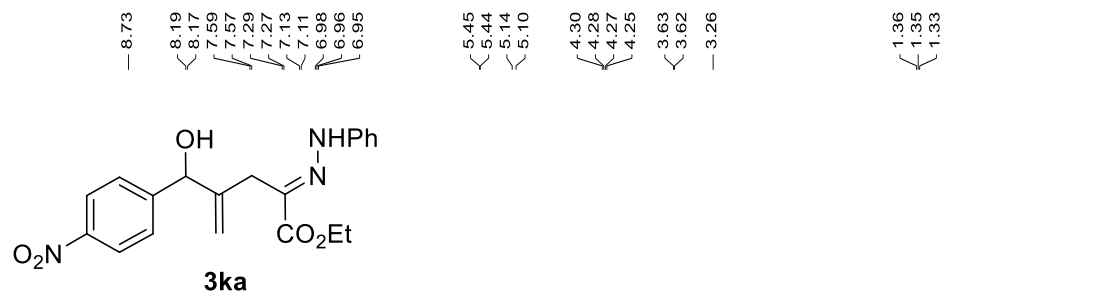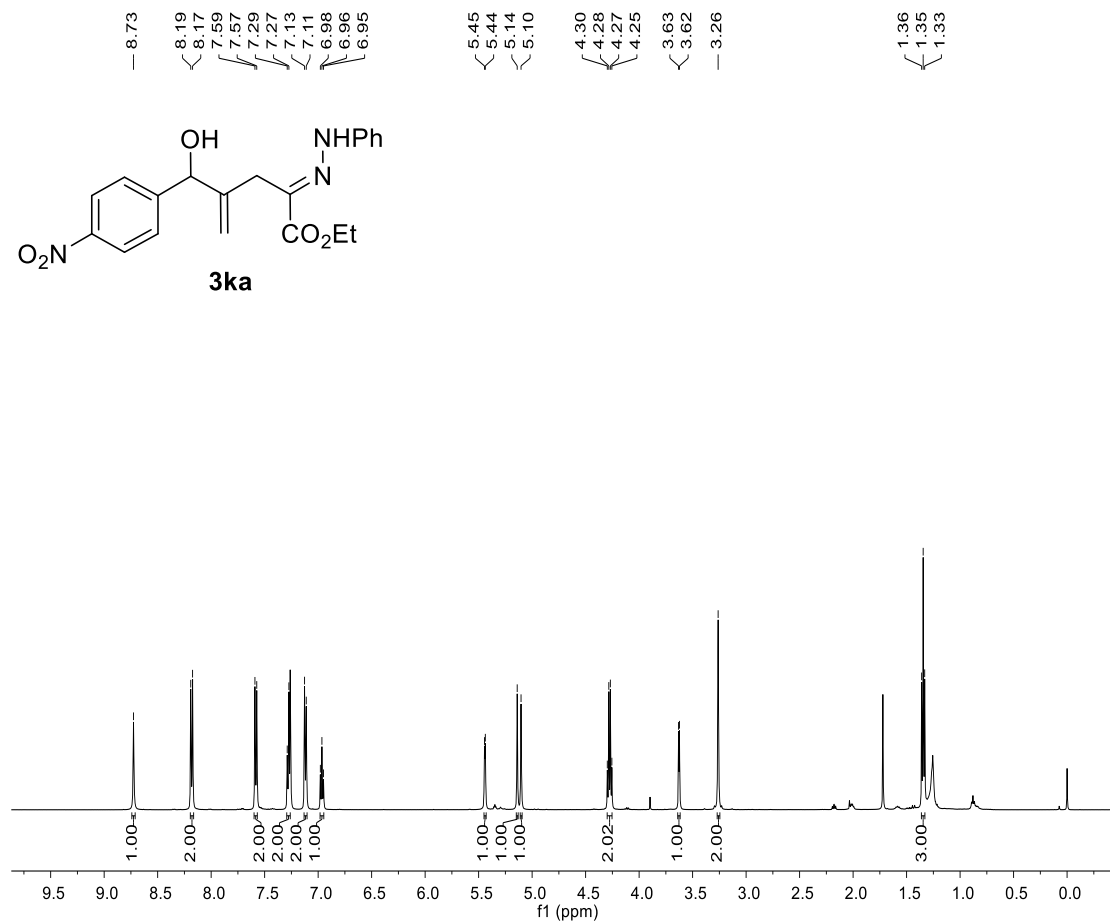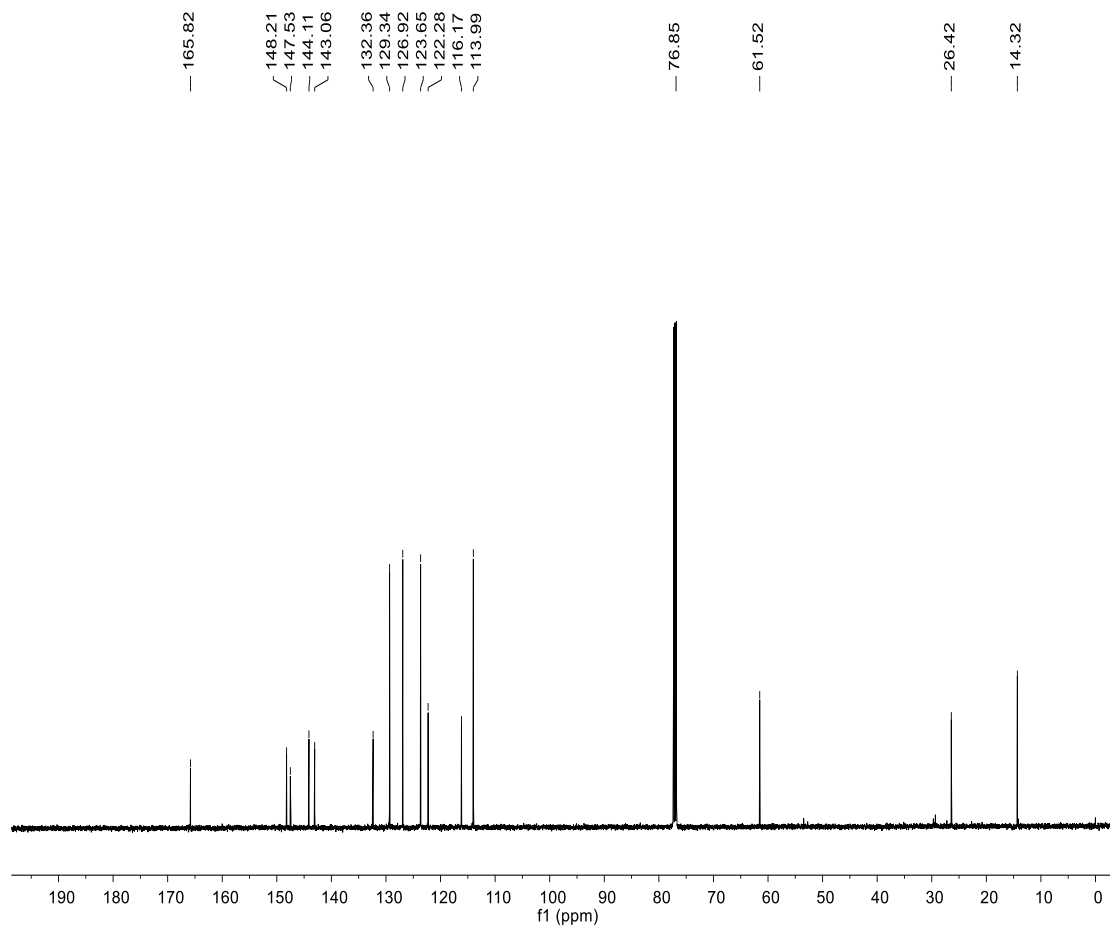

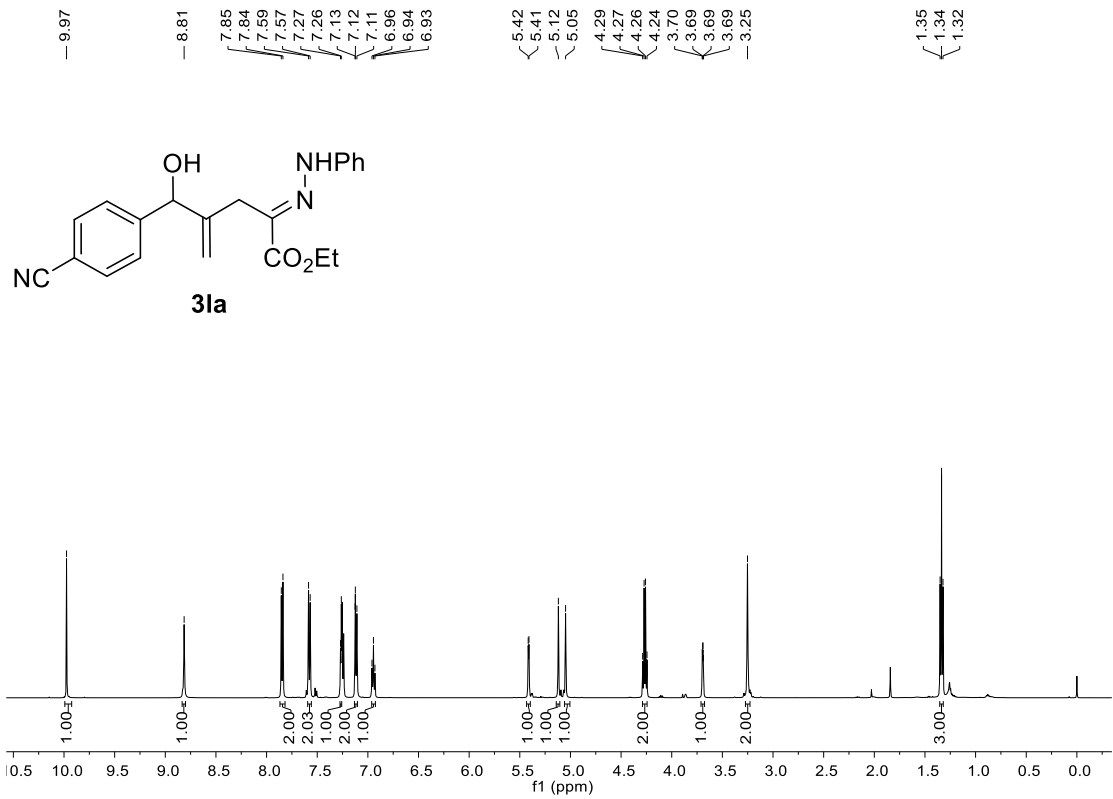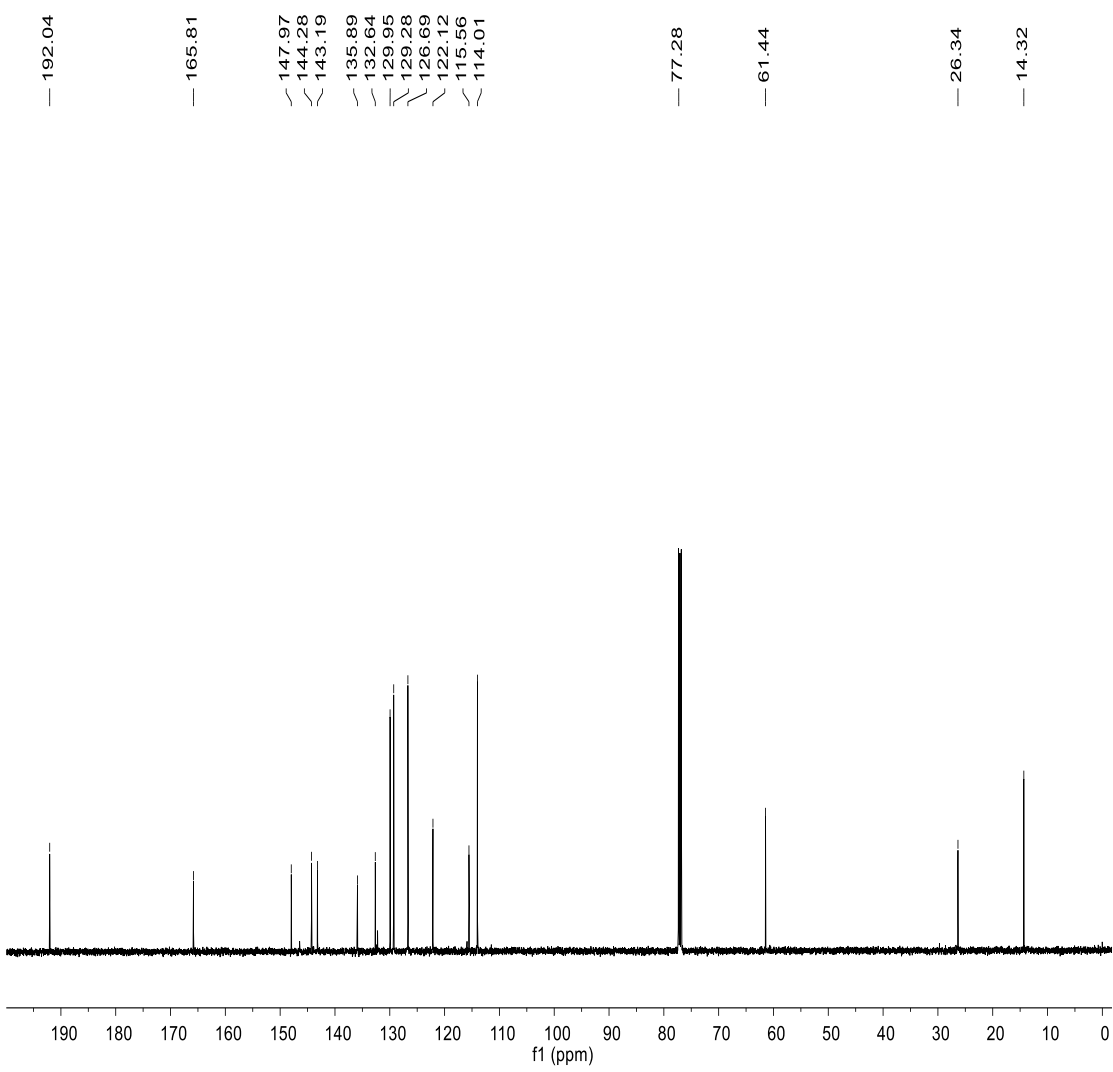



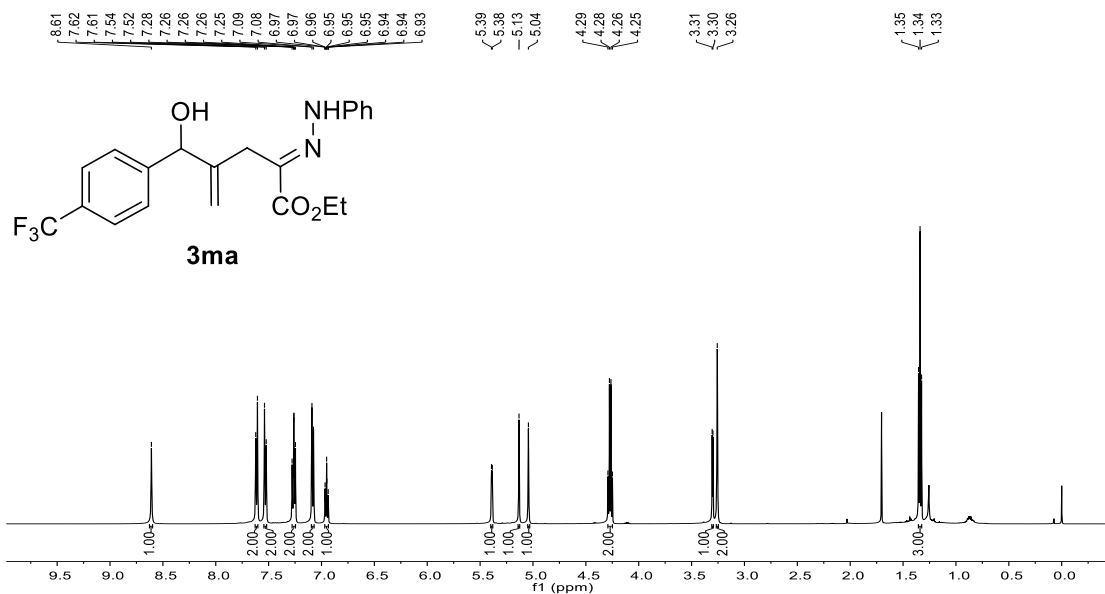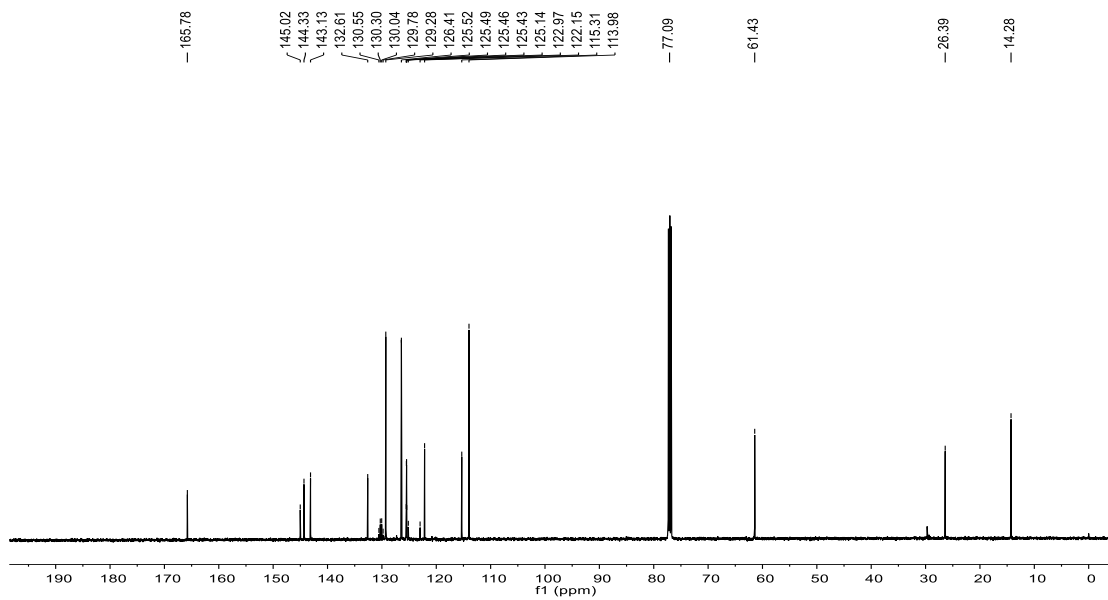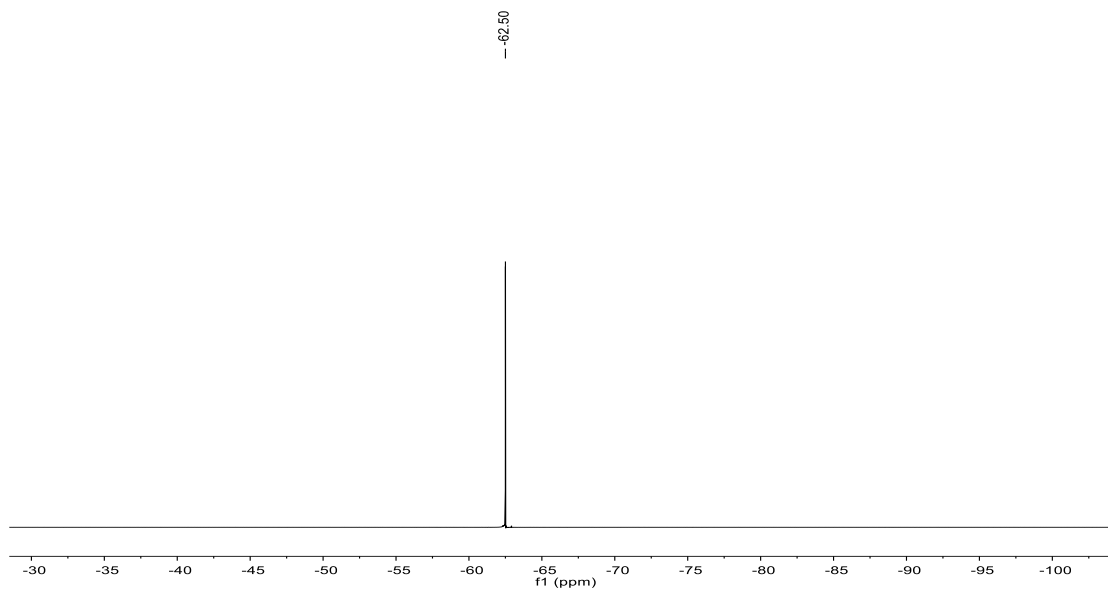

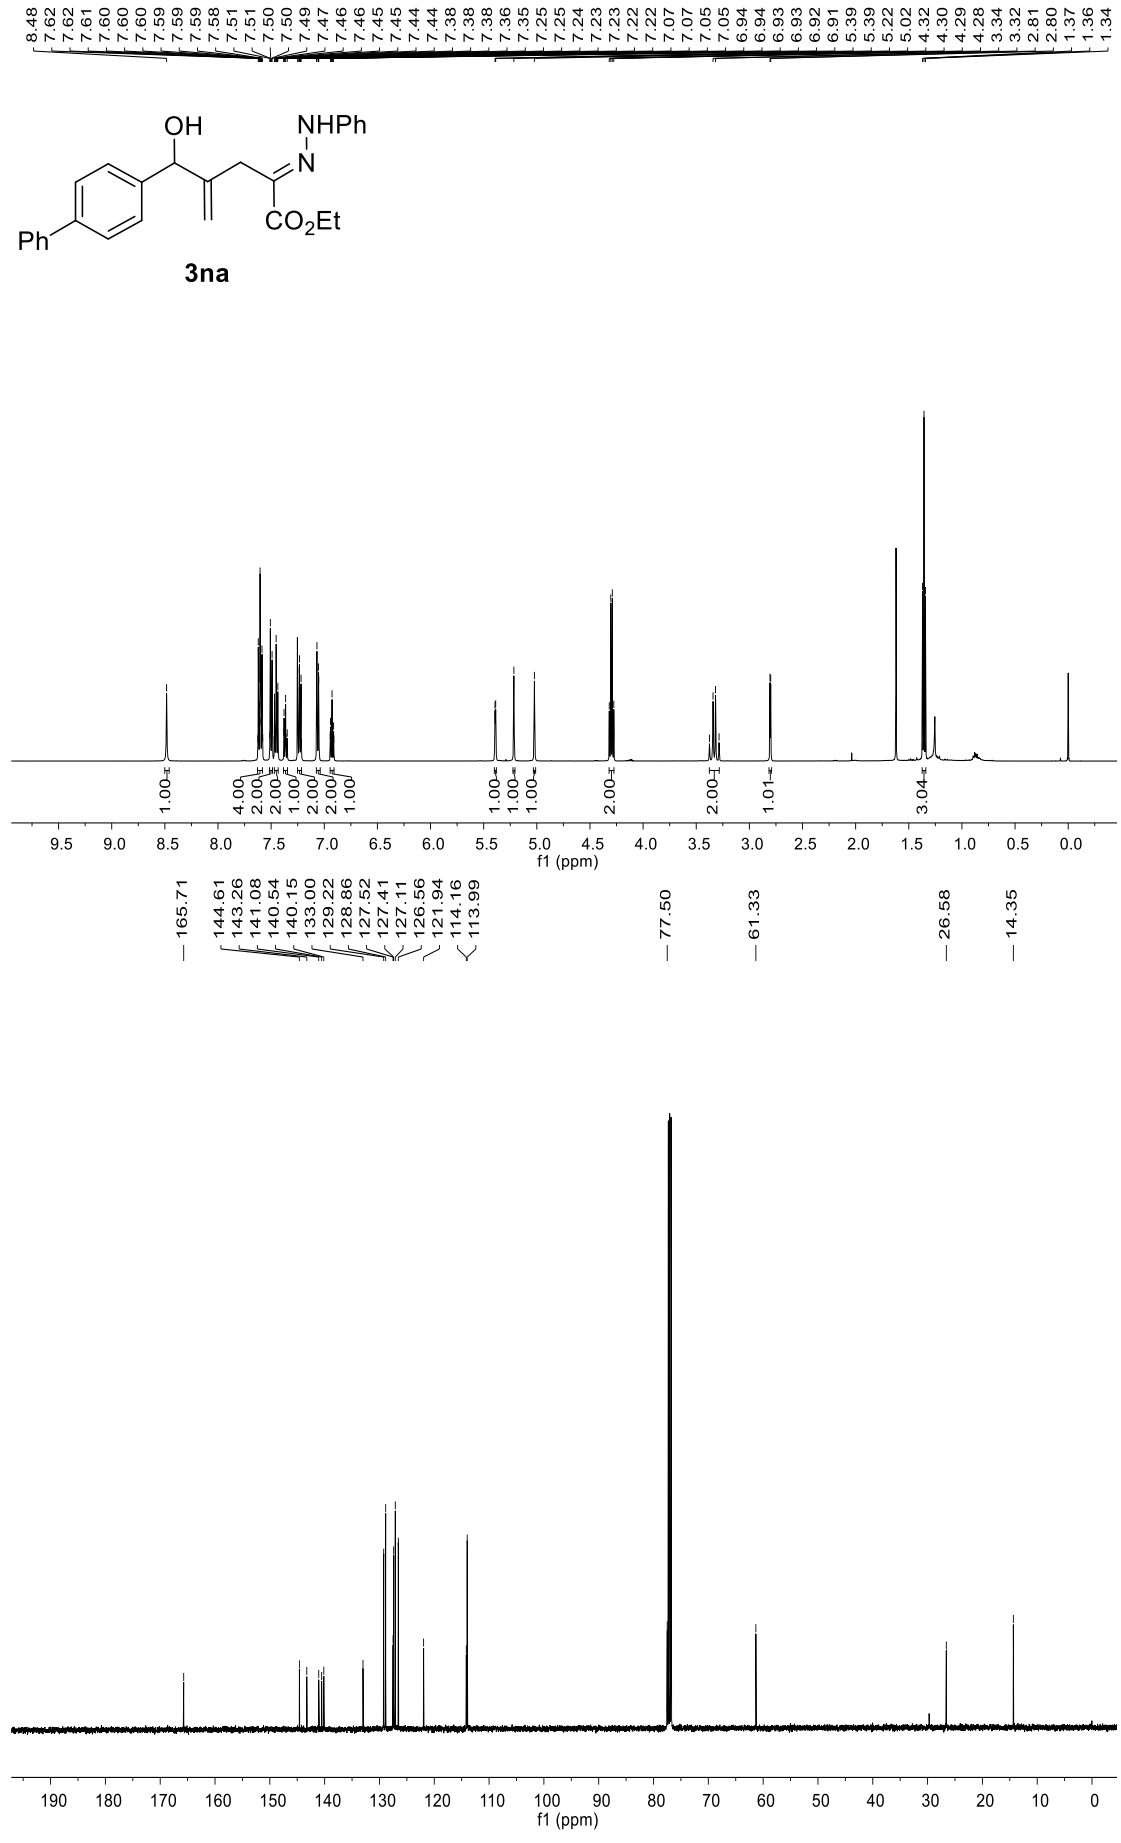

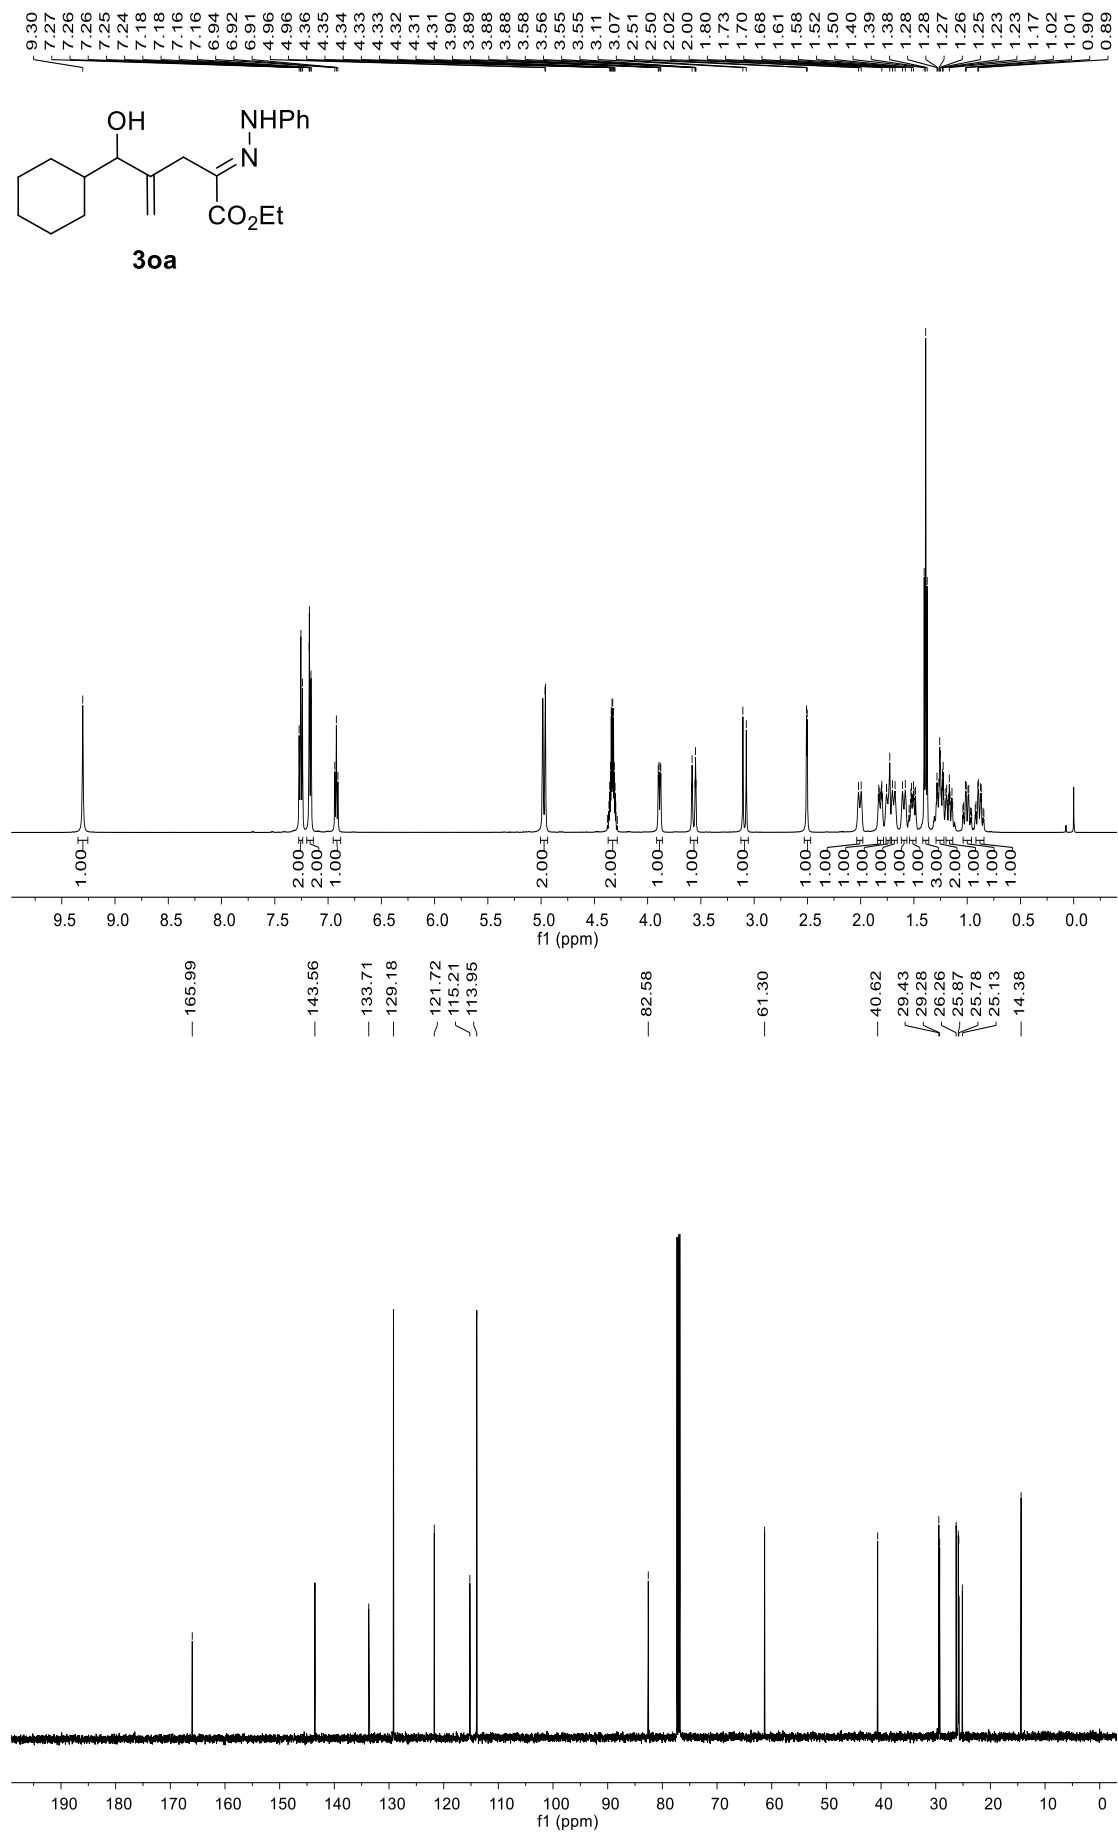

8.81  
8.80  
7.62  
7.61  
7.60  
7.58  
7.58  
7.40  
7.39  
7.38  
7.35  
7.35  
7.34  
7.34  
7.33  
7.32  
7.32  
7.29  
7.29  
7.29  
7.28  
7.28  
7.26  
7.10  
7.08  
7.07  
7.03  
7.03  
7.02  
7.01  
7.01  
7.01  
6.99  
6.99  
6.89  
6.89  
6.88  
6.88  
6.87  
6.86  
6.86  
6.86  
5.27  
5.26  
5.16  
5.02  
4.29  
4.28  
4.28  
4.25  
4.25  
3.34  
3.31  
3.29  
3.25  
2.99  
2.99  
1.35  
1.34  
1.32

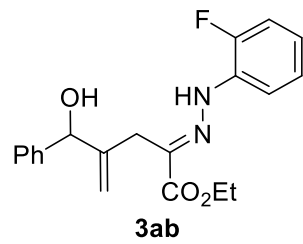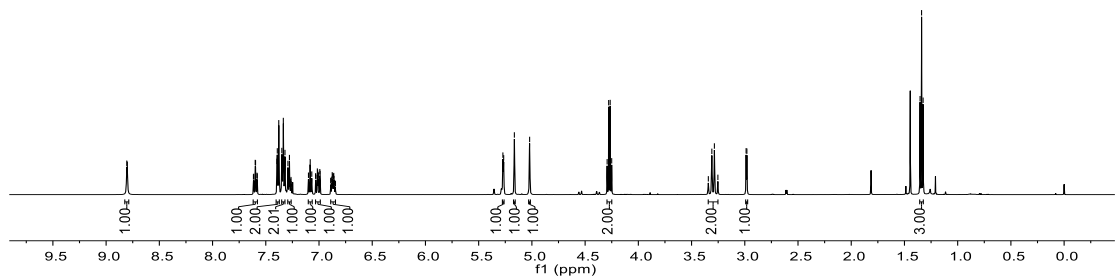

165.47  
151.56  
149.64  
144.41  
144.01  
141.01  
135.37  
131.82  
131.75  
128.57  
127.93  
126.53  
126.10  
124.90  
124.87  
121.63  
121.58  
115.75  
115.73  
115.10  
114.96  
114.18

77.05  
61.45  
27.27  
14.31

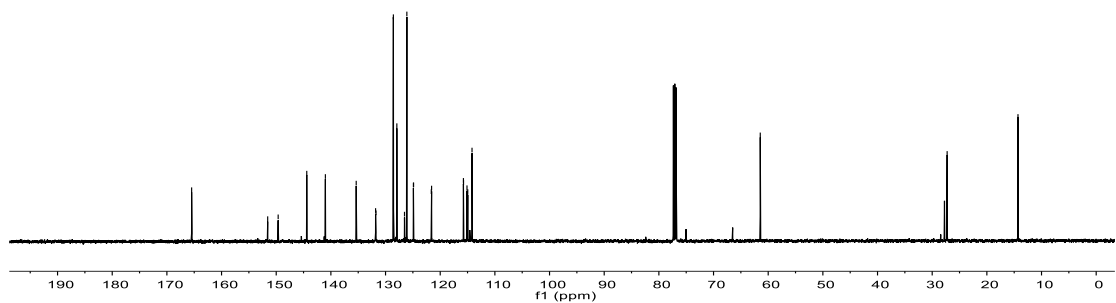

135.07

112  
116  
120  
124  
128  
132  
136  
140  
144  
148  
152  
156  
160  
164  
168  
172

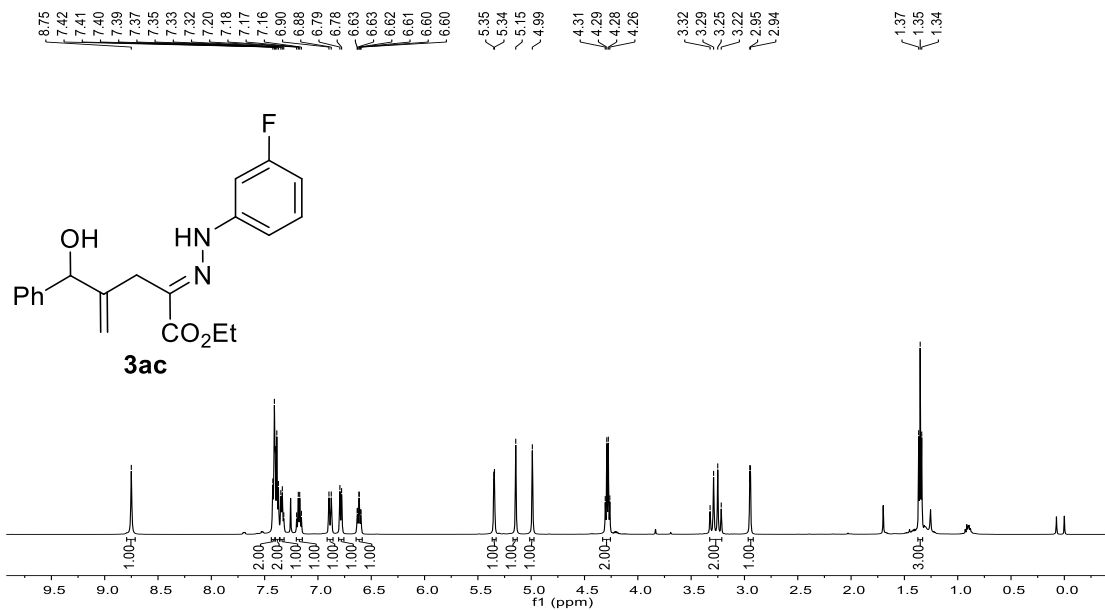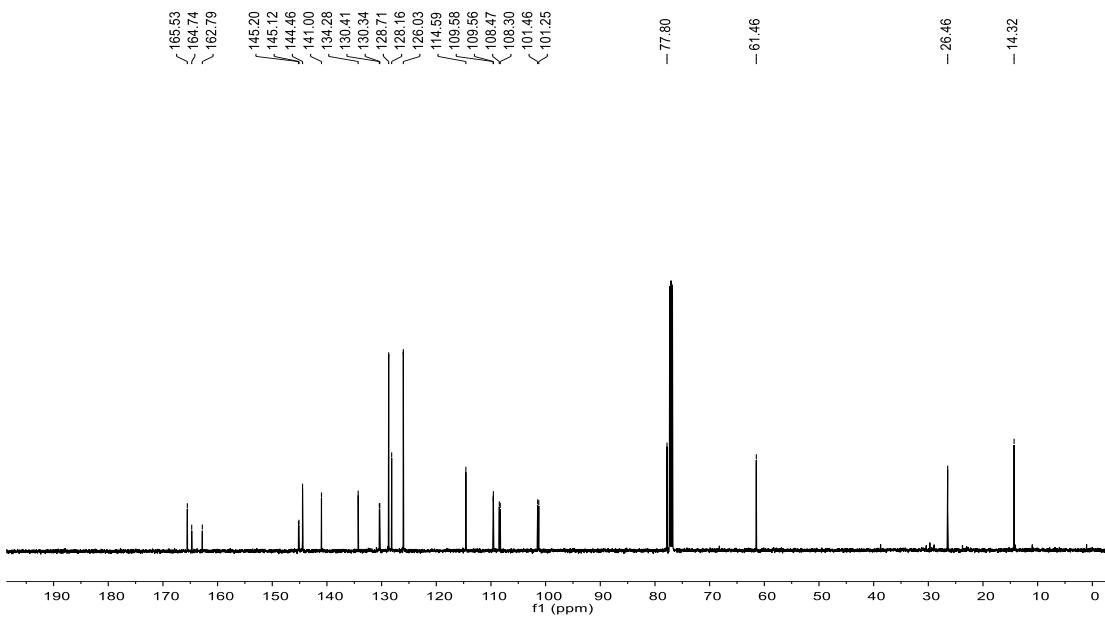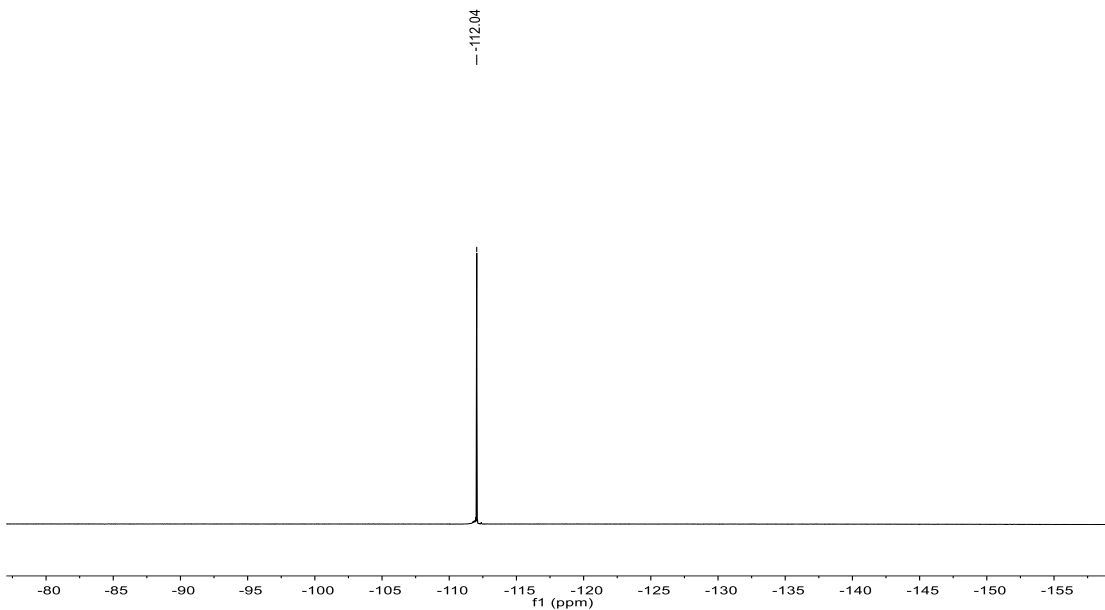

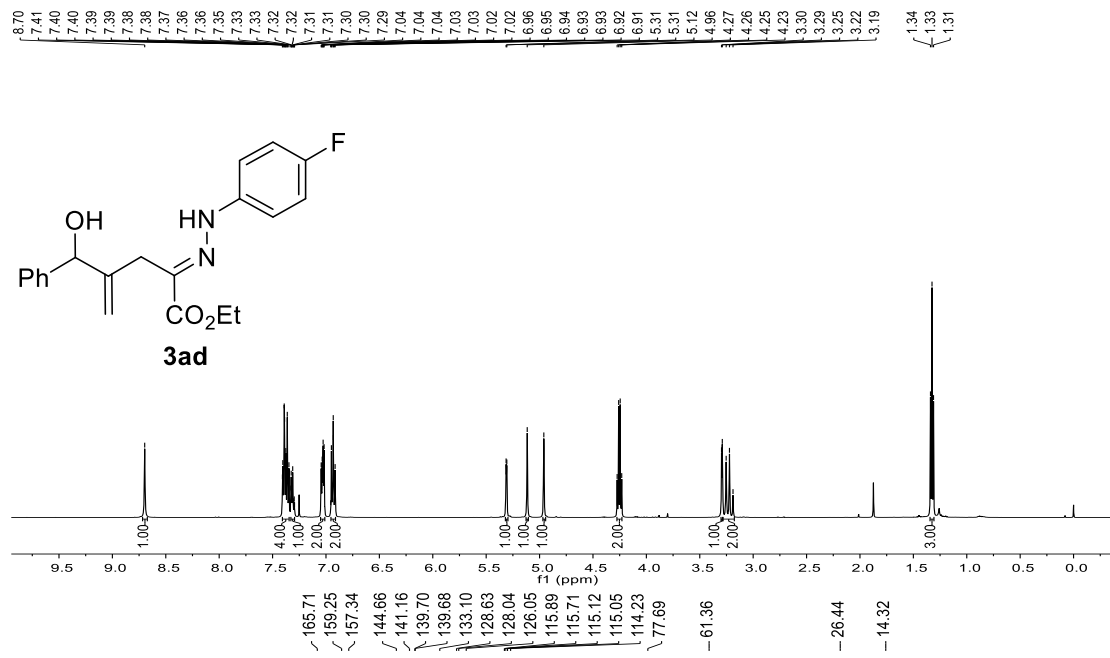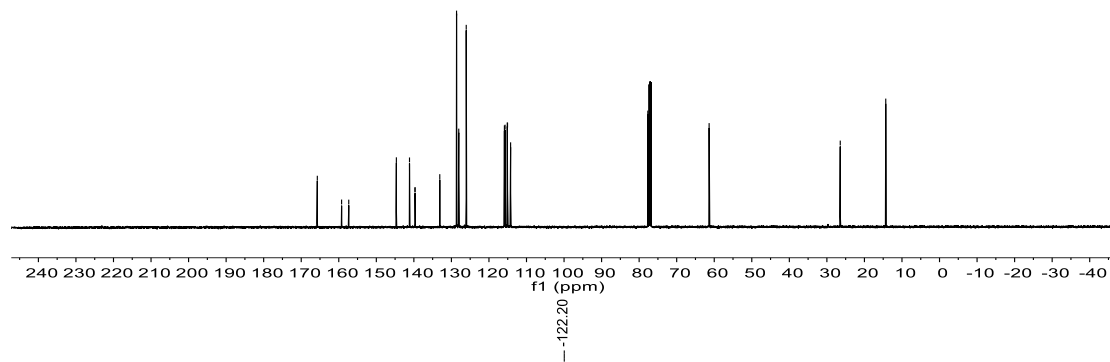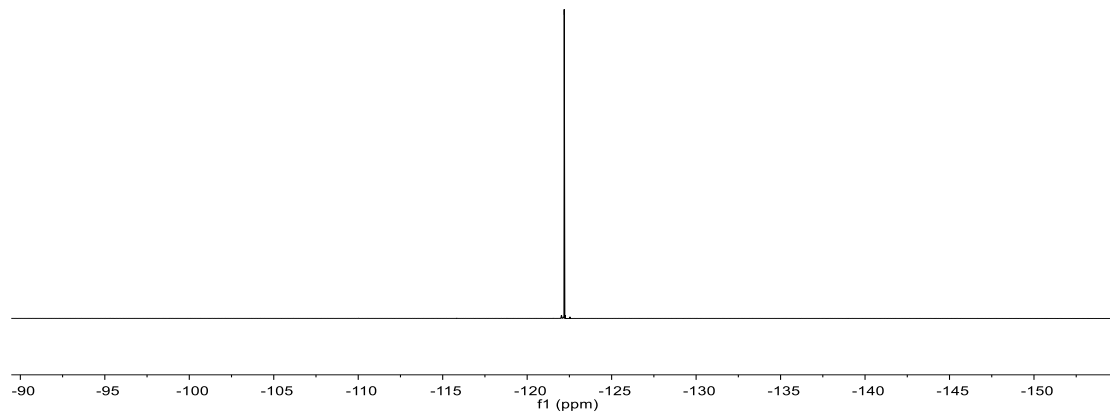

8.74  
7.42  
7.42  
7.40  
7.40  
7.38  
7.37  
7.35  
7.35  
7.34  
7.34  
7.33  
7.32  
7.32  
7.16  
7.15  
7.13  
7.09  
7.09  
6.96  
6.95  
6.94  
6.89  
6.89  
6.88  
6.87  
5.34  
5.33  
5.14  
4.97  
4.30  
4.29  
4.27  
4.26  
3.31  
3.28  
3.24  
3.21  
3.07  
3.07

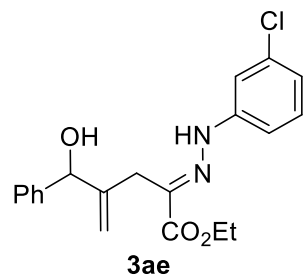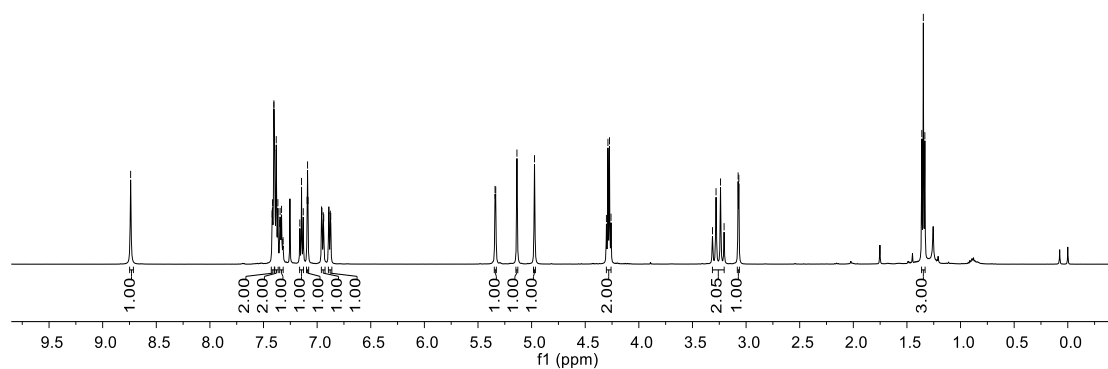

165.53  
144.55  
144.48  
141.02  
135.03  
134.47  
130.22  
128.71  
128.16  
126.03  
121.71  
114.55  
114.11  
112.14  
77.80  
61.51  
26.42  
14.33

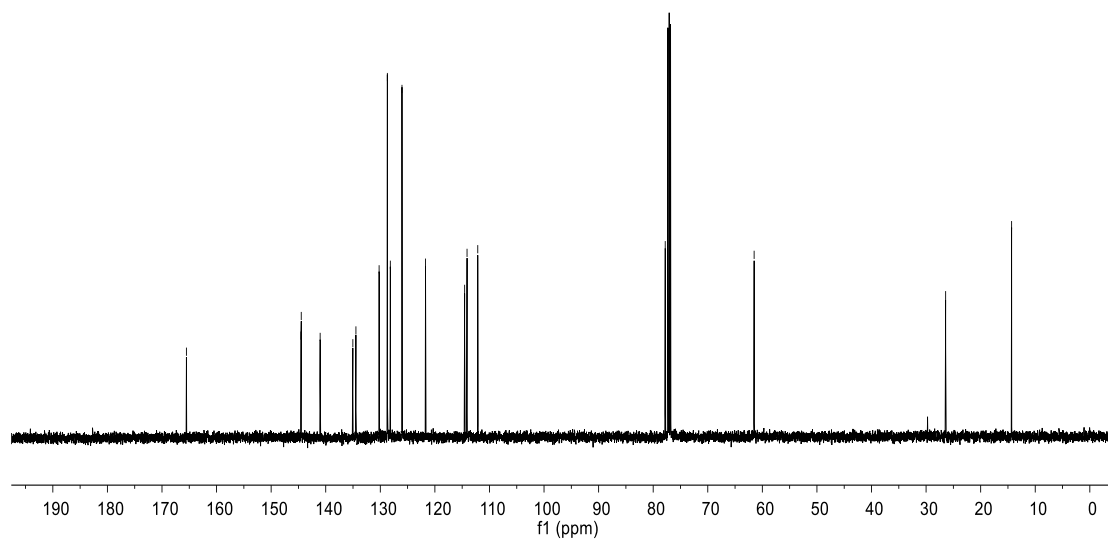

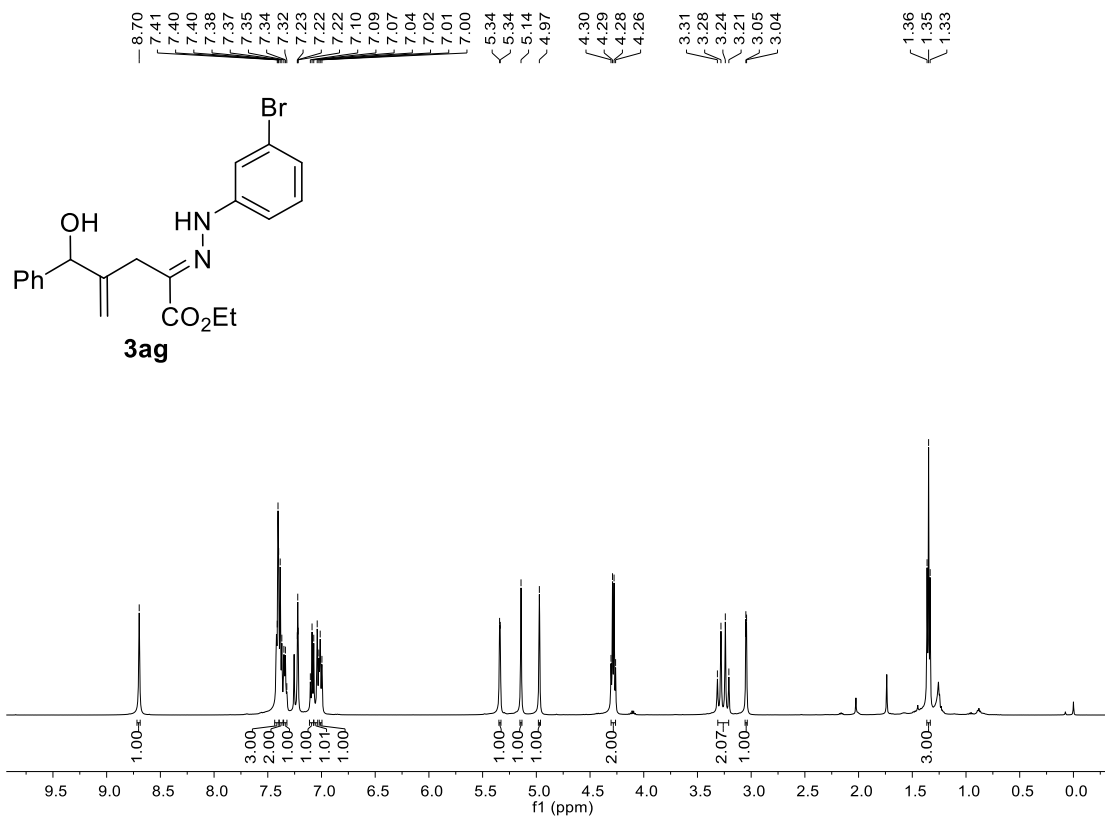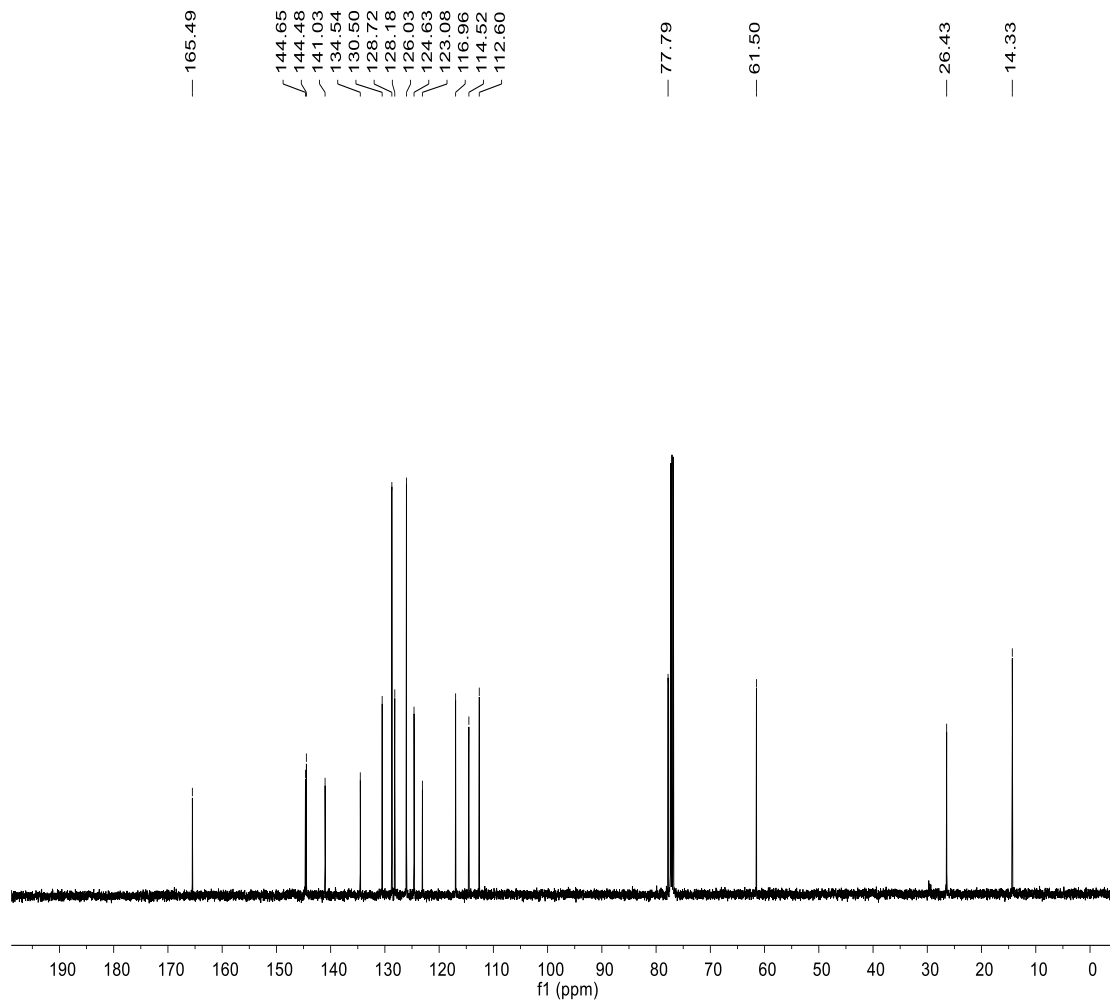



8.65  
7.43  
7.43  
7.42  
7.41  
7.41  
7.40  
7.40  
7.39  
7.39  
7.38  
7.37  
7.36  
7.36  
7.35  
7.35  
7.34  
7.34  
6.98  
6.98  
6.97  
6.96  
6.96  
6.95  
5.36  
5.36  
5.16  
5.16  
5.00  
4.31  
4.30  
4.28  
4.27  
4.27  
3.34  
3.33  
3.33  
3.30  
3.30  
3.30  
3.27  
3.23  
2.74  
2.73

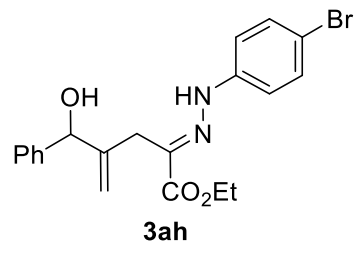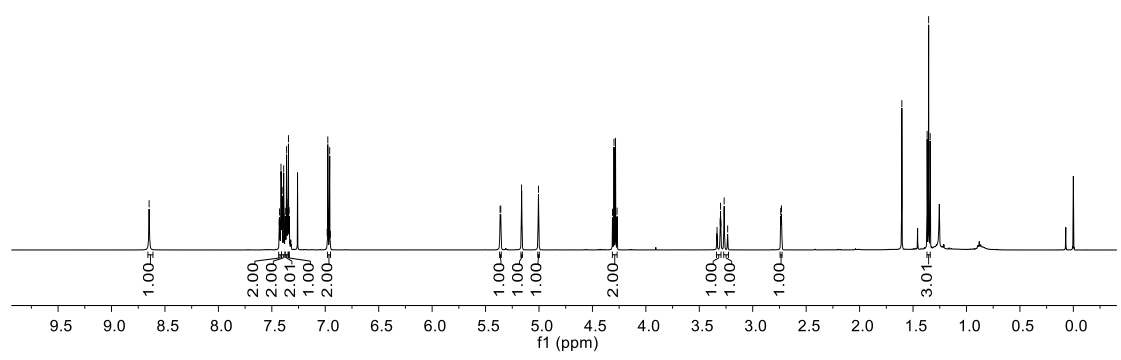

165.47  
144.43  
142.47  
140.98  
134.04  
132.05  
128.72  
128.19  
126.02  
115.55  
114.60  
113.99  
77.82  
61.41  
26.53  
14.32

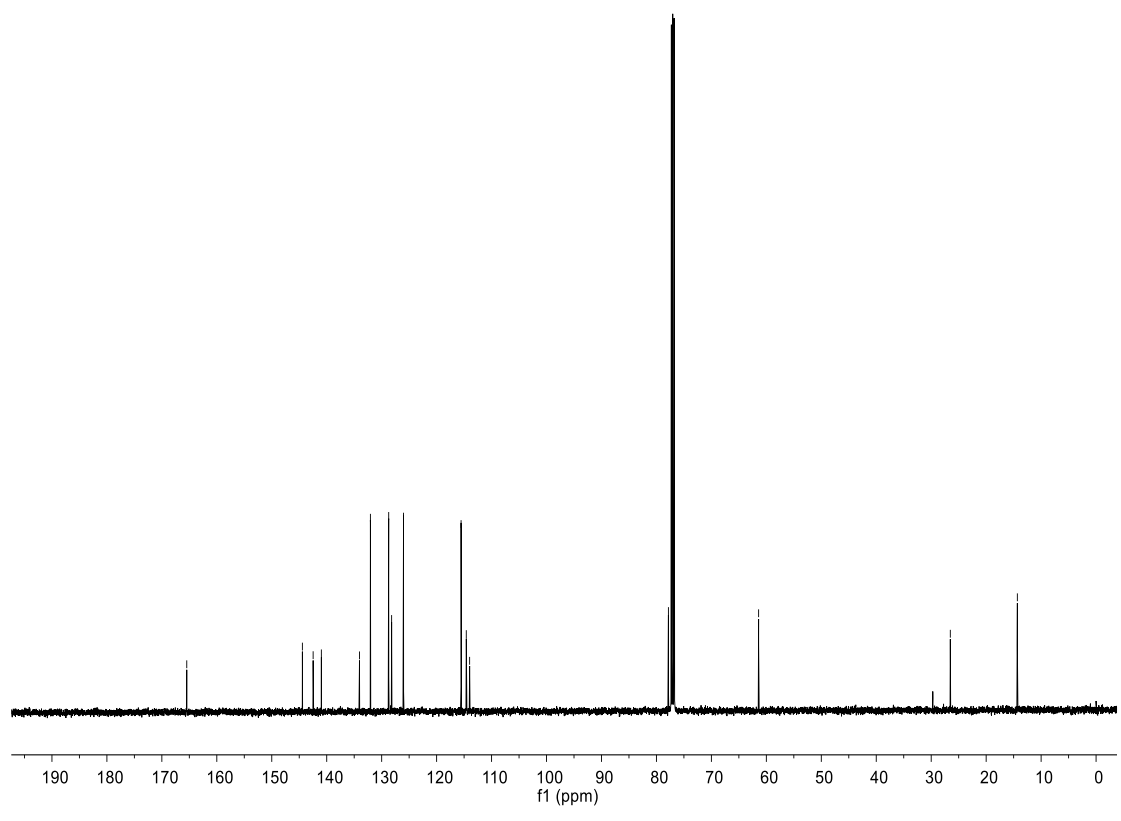

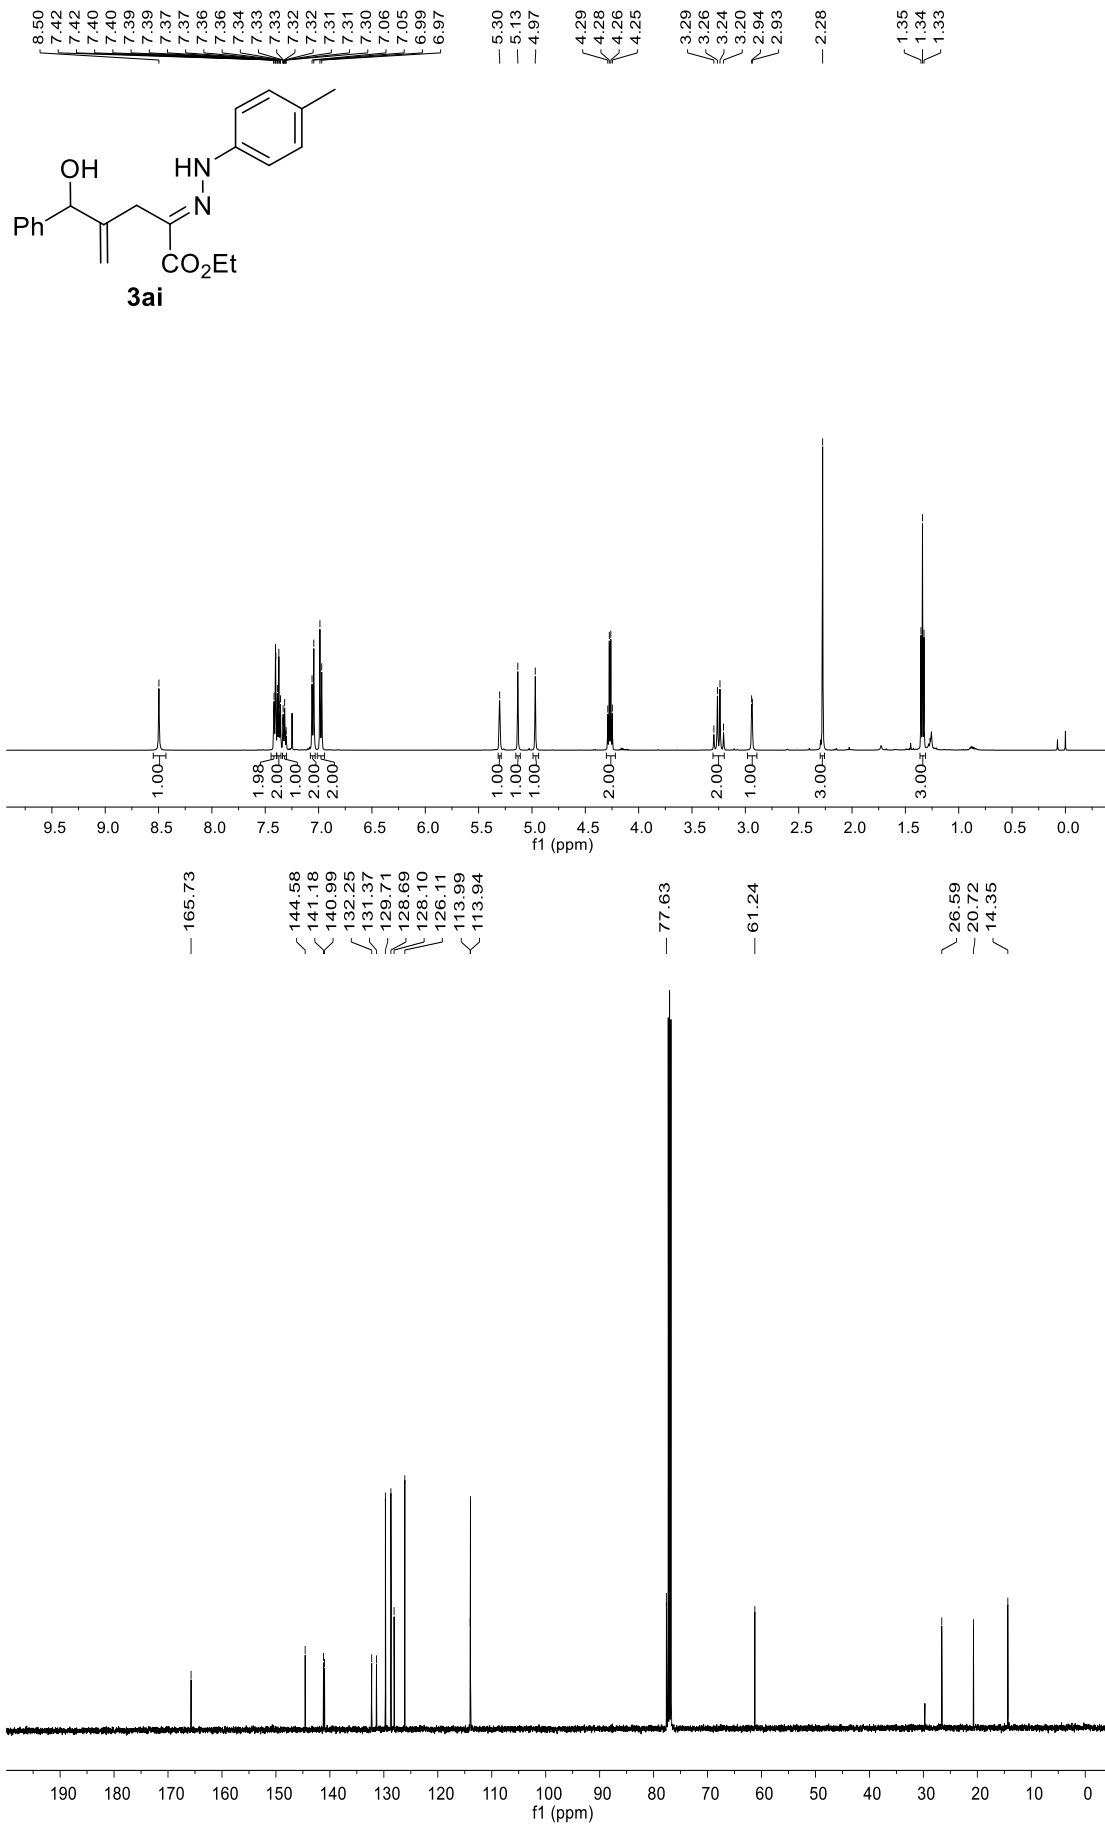

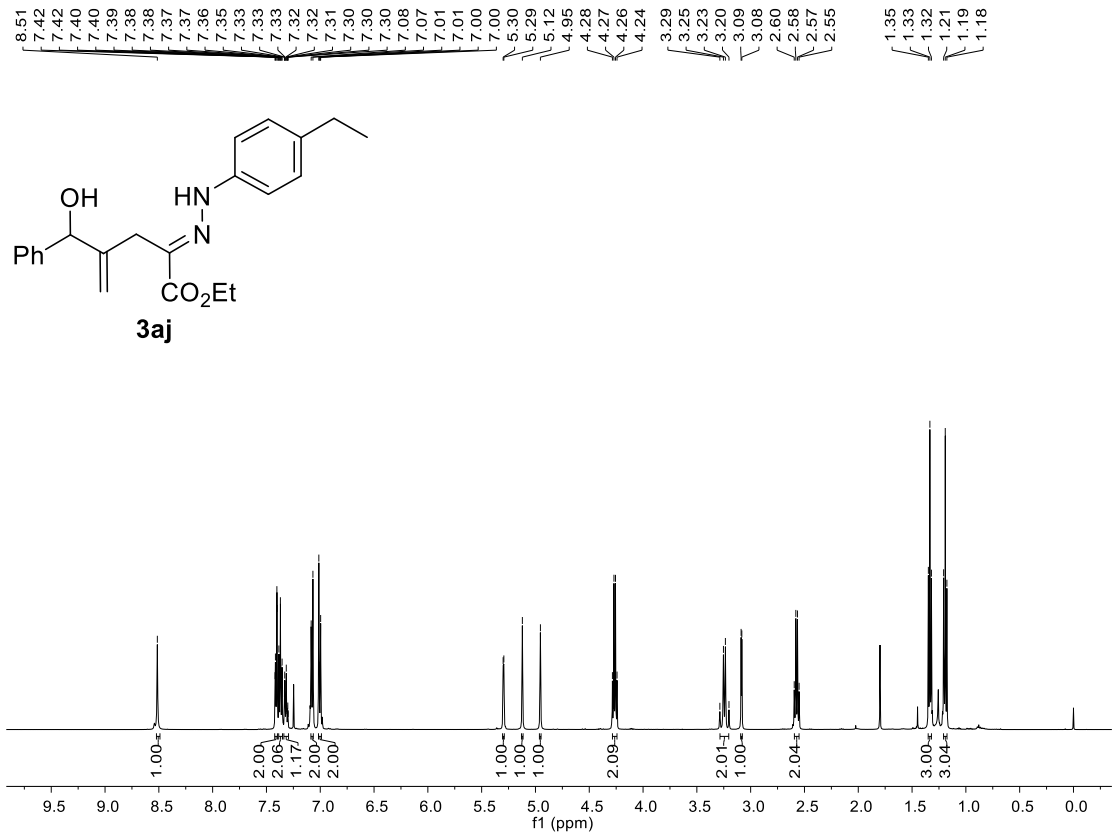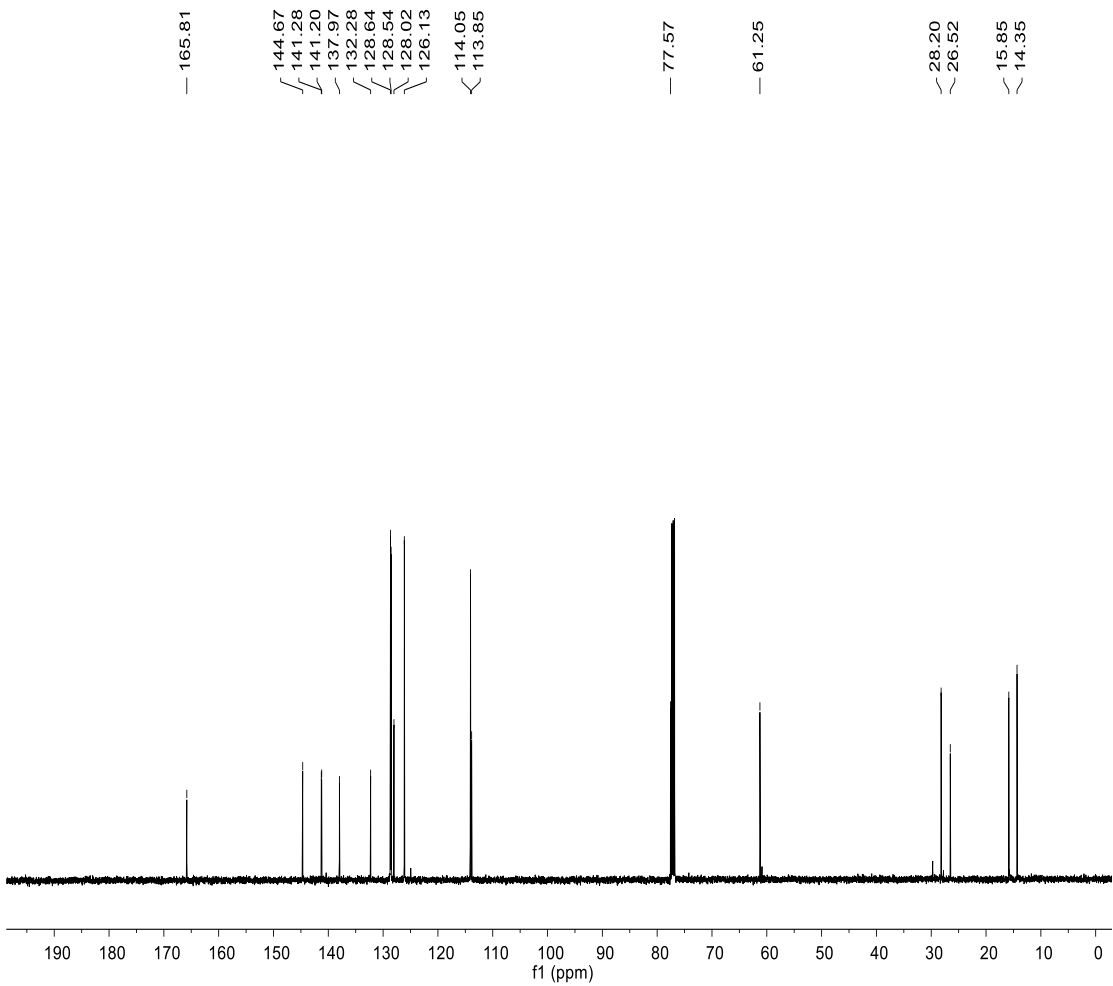

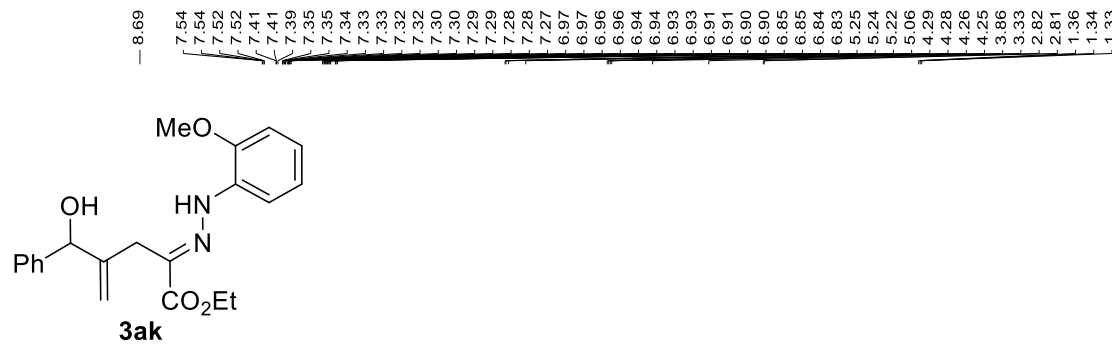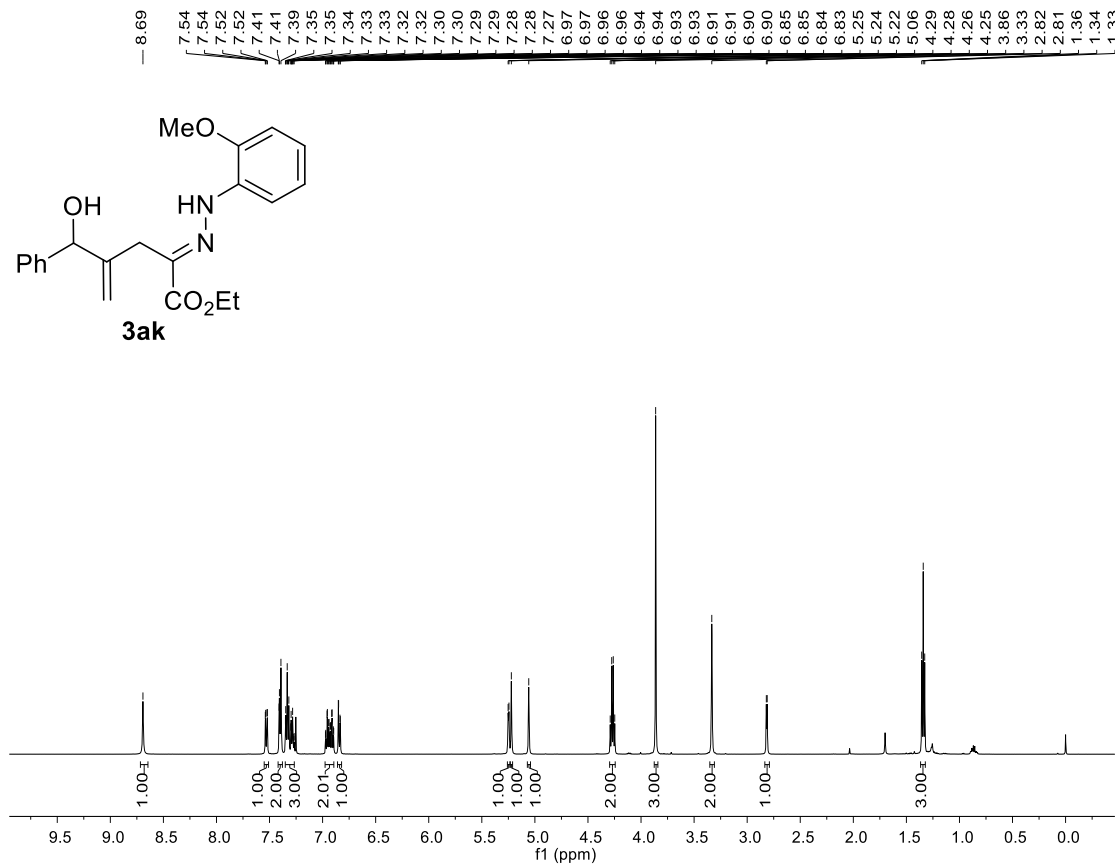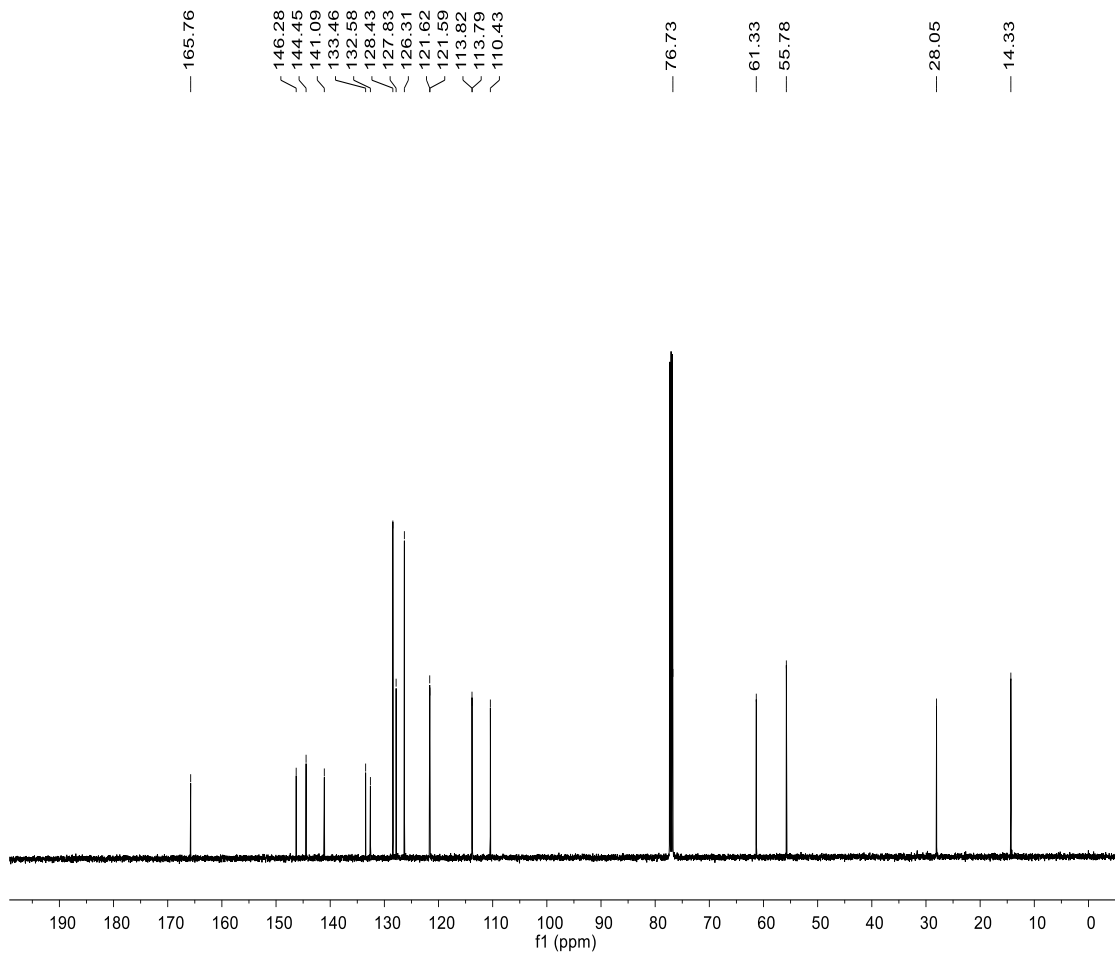

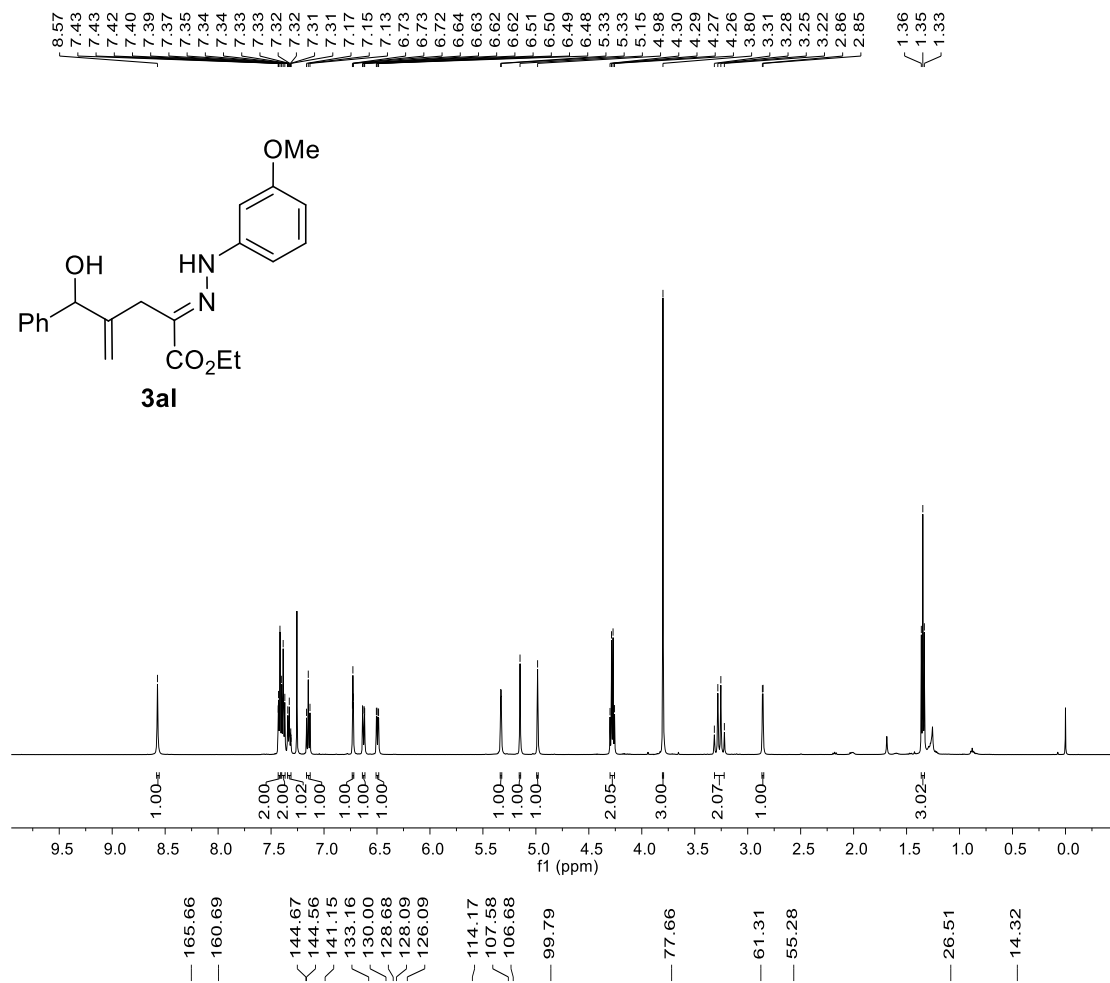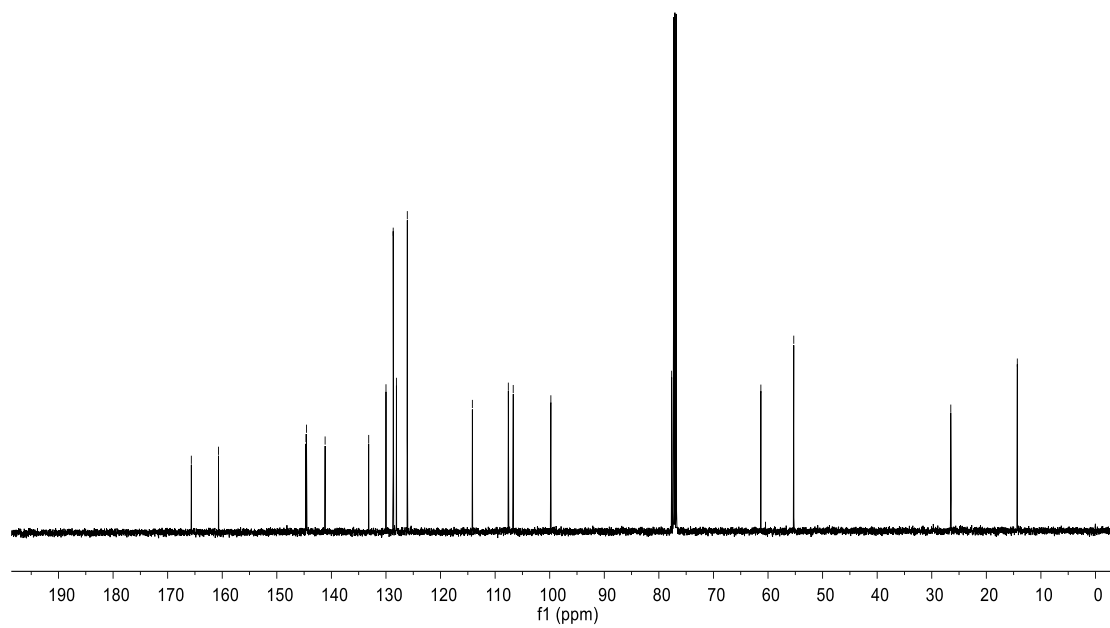

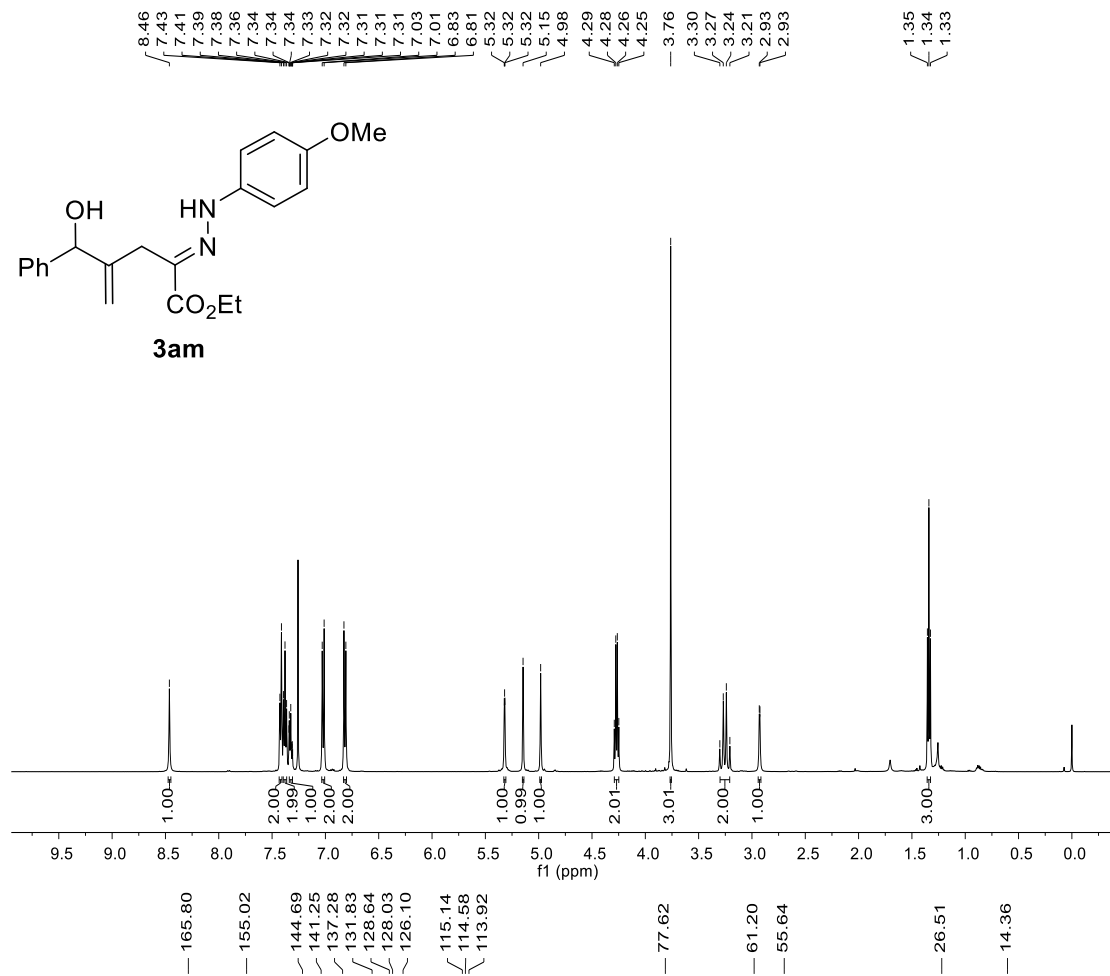

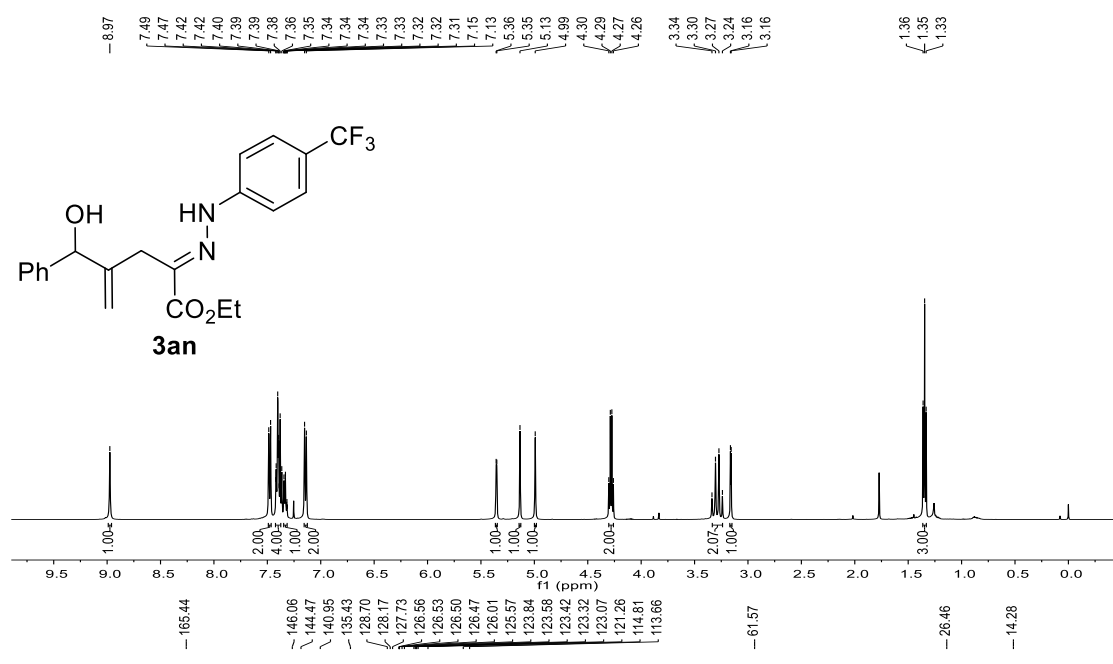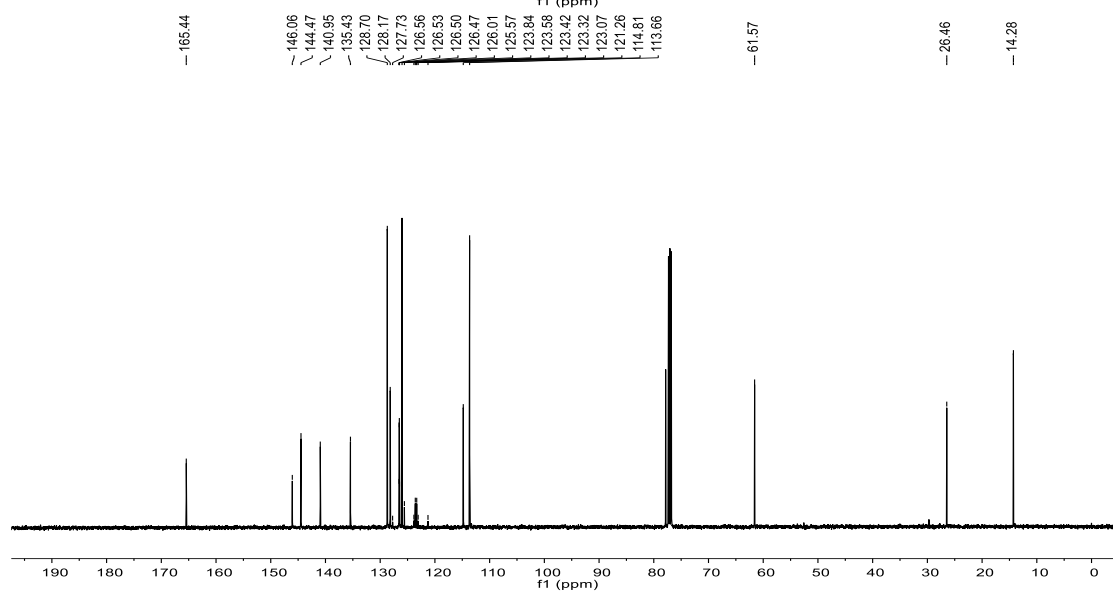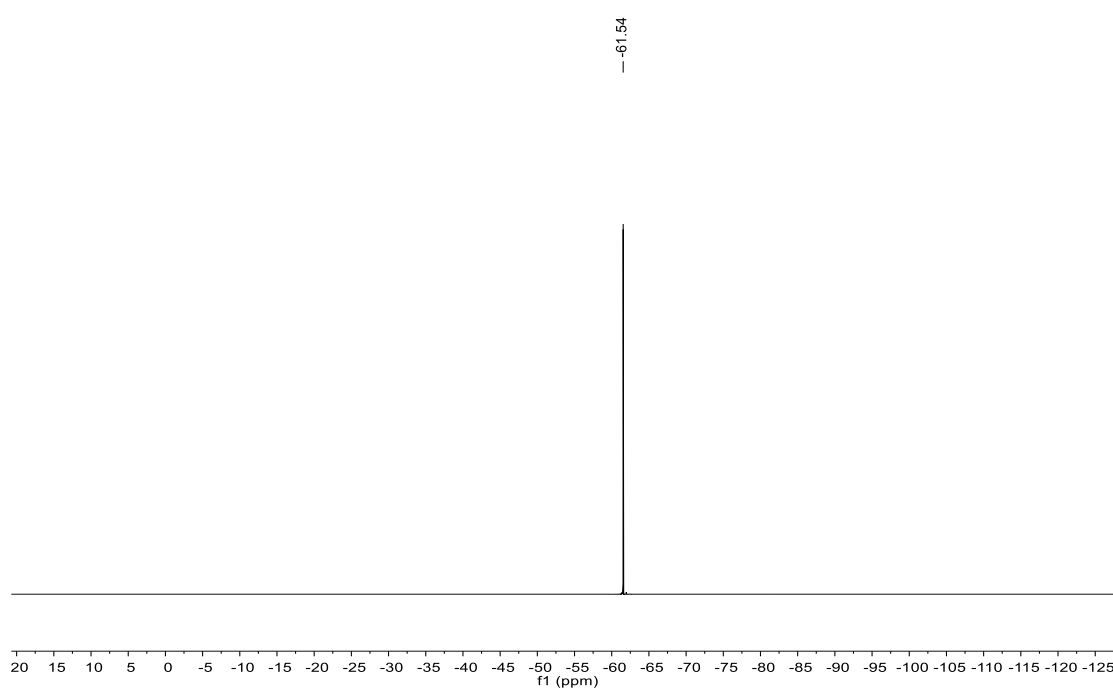

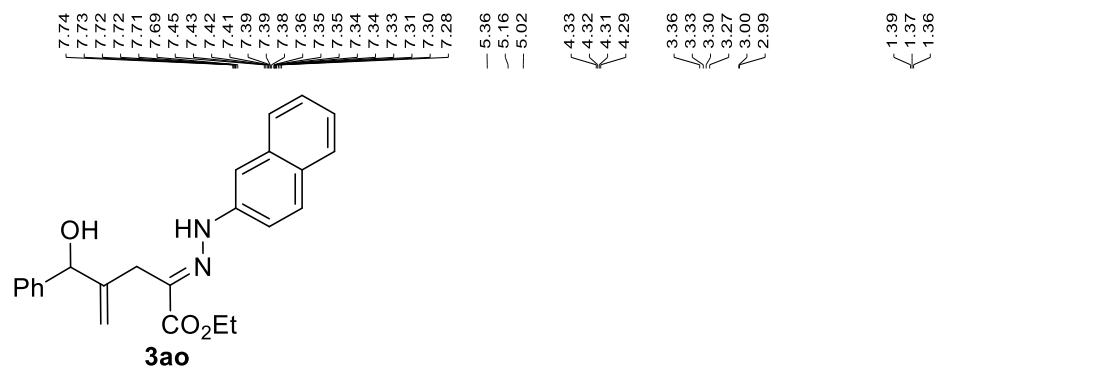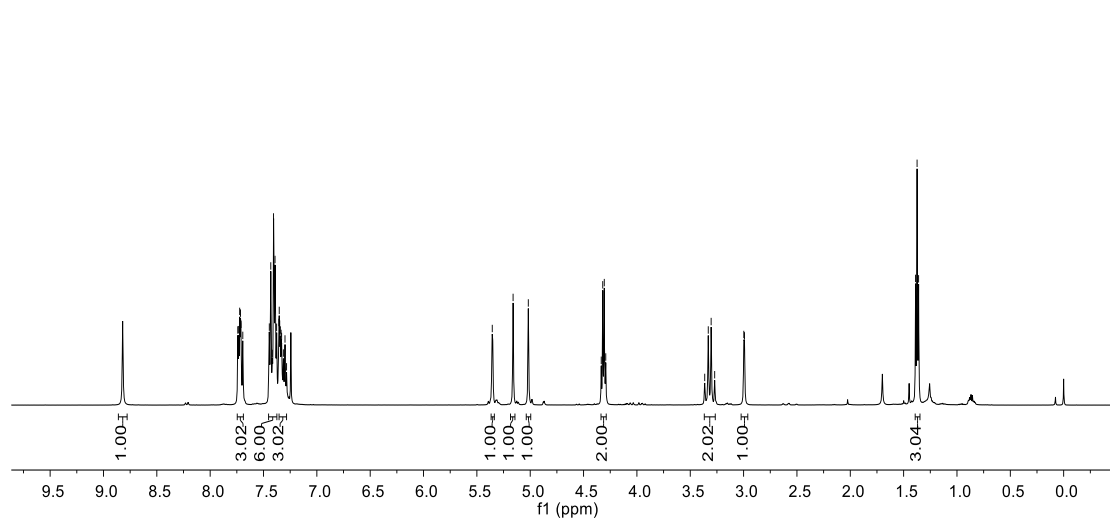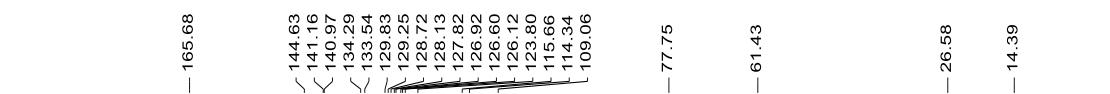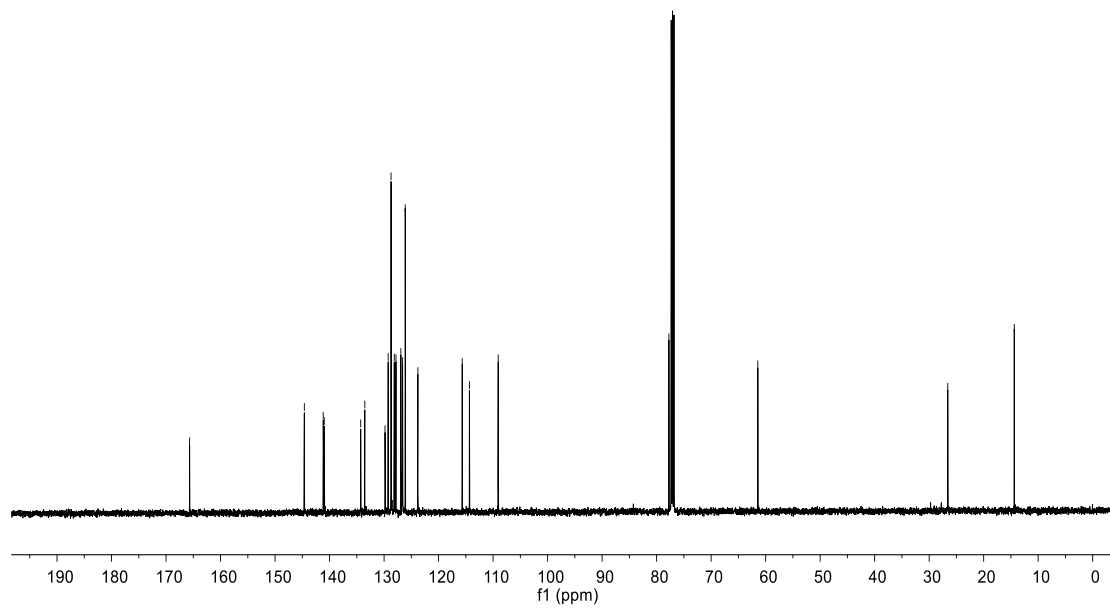



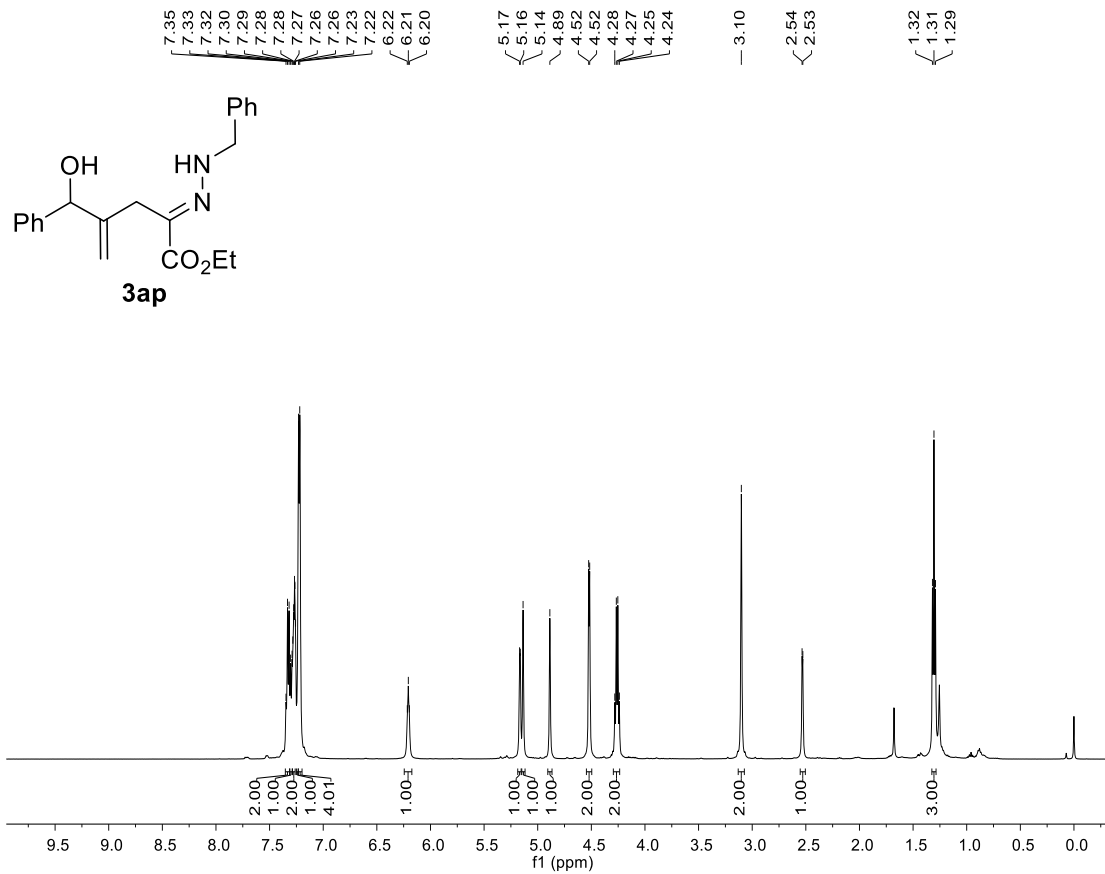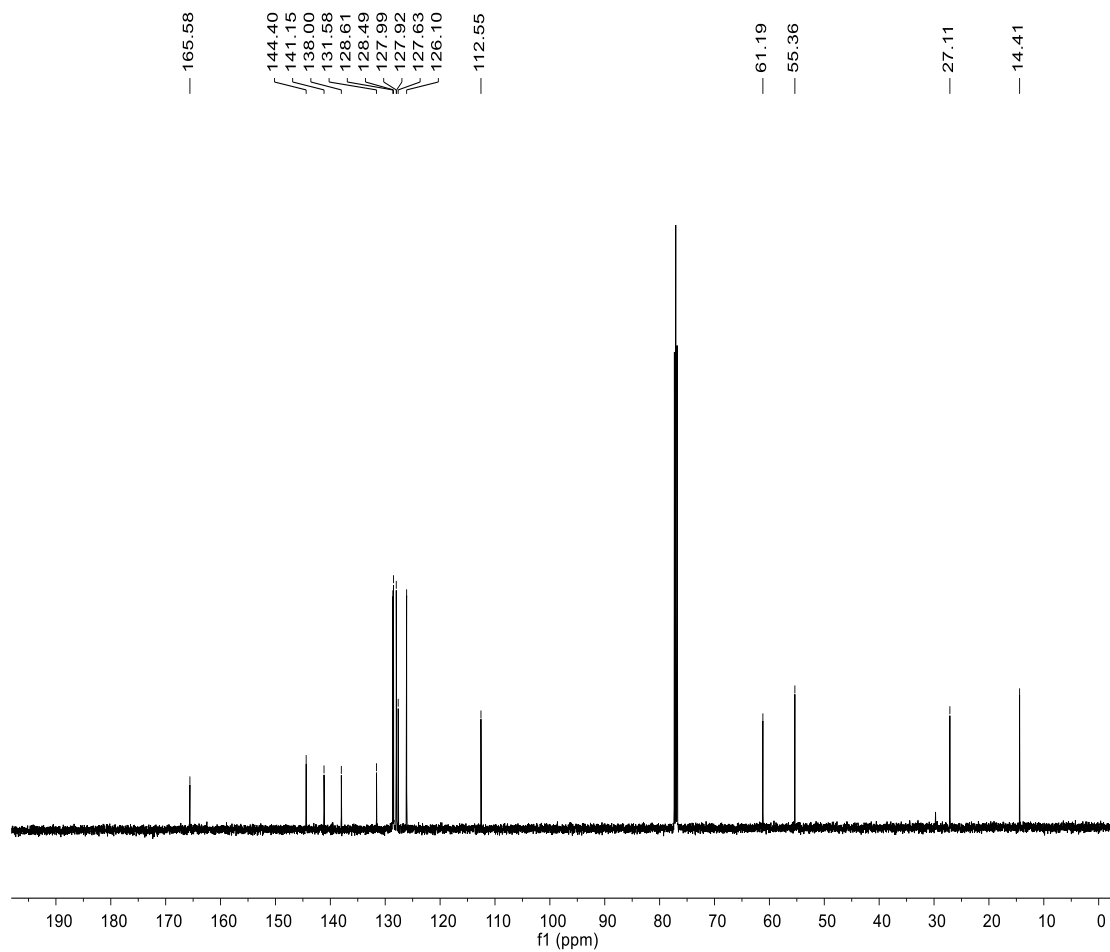

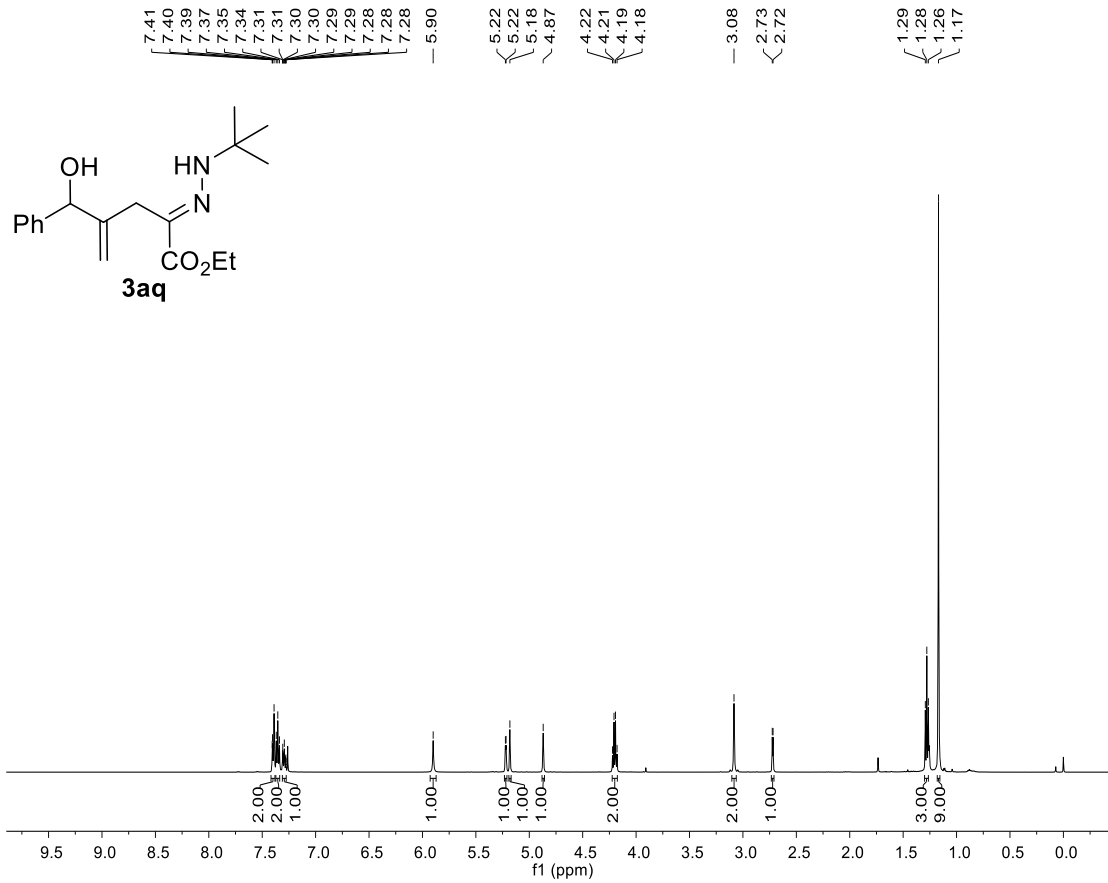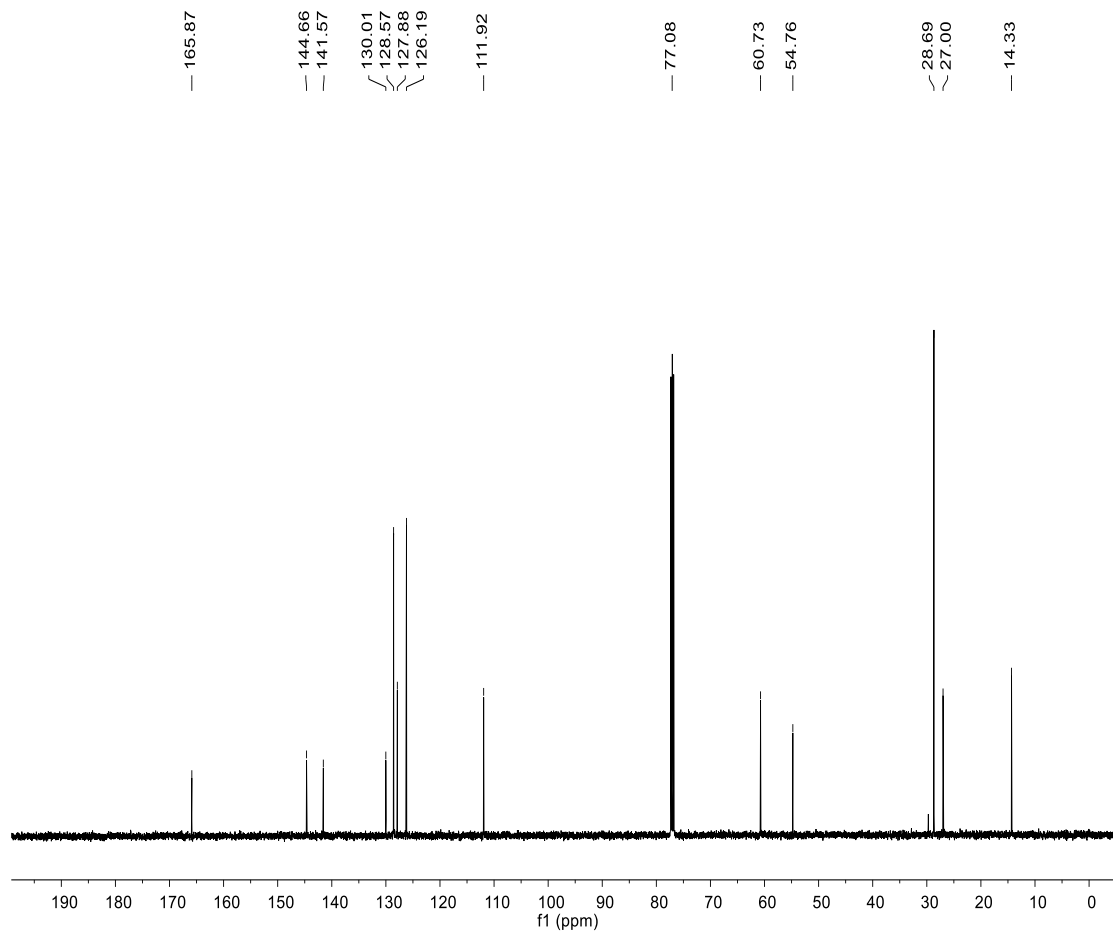

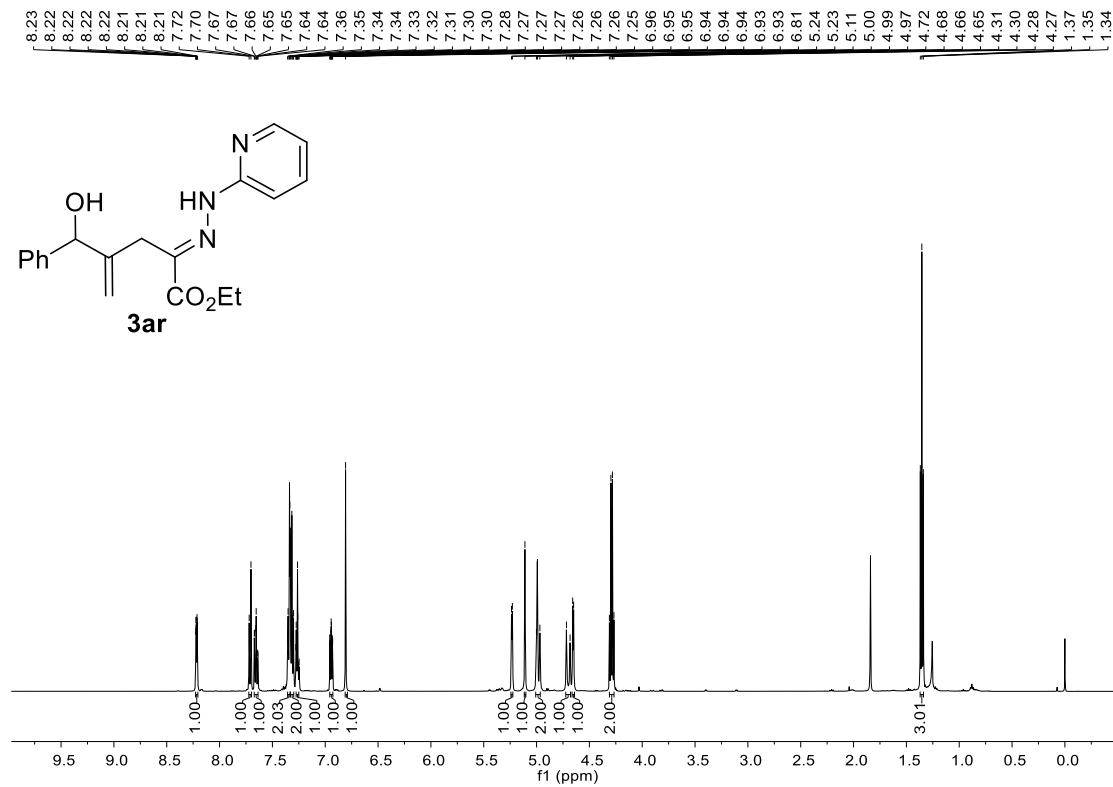

- 164.15
- 156.73
- 146.70
- 143.53
- 140.68
- 138.43
- 128.28
- 127.63
- 126.21
- 124.73
- 118.17
- 114.57
- 111.51
- 74.78
- 60.90
- 46.22
- 14.32

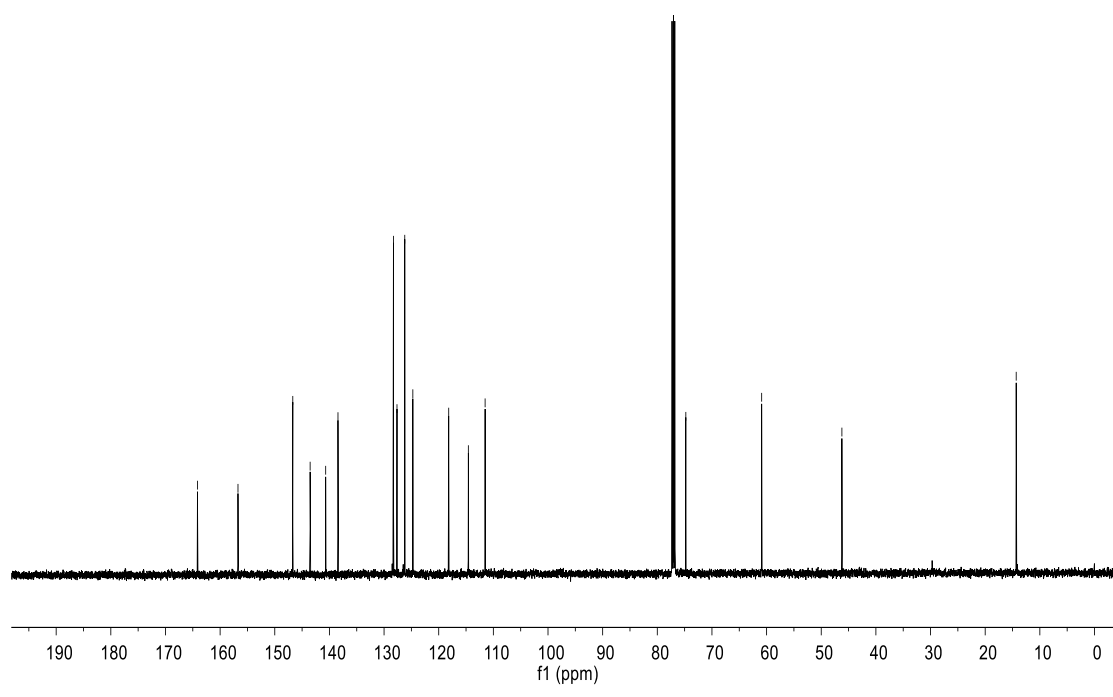

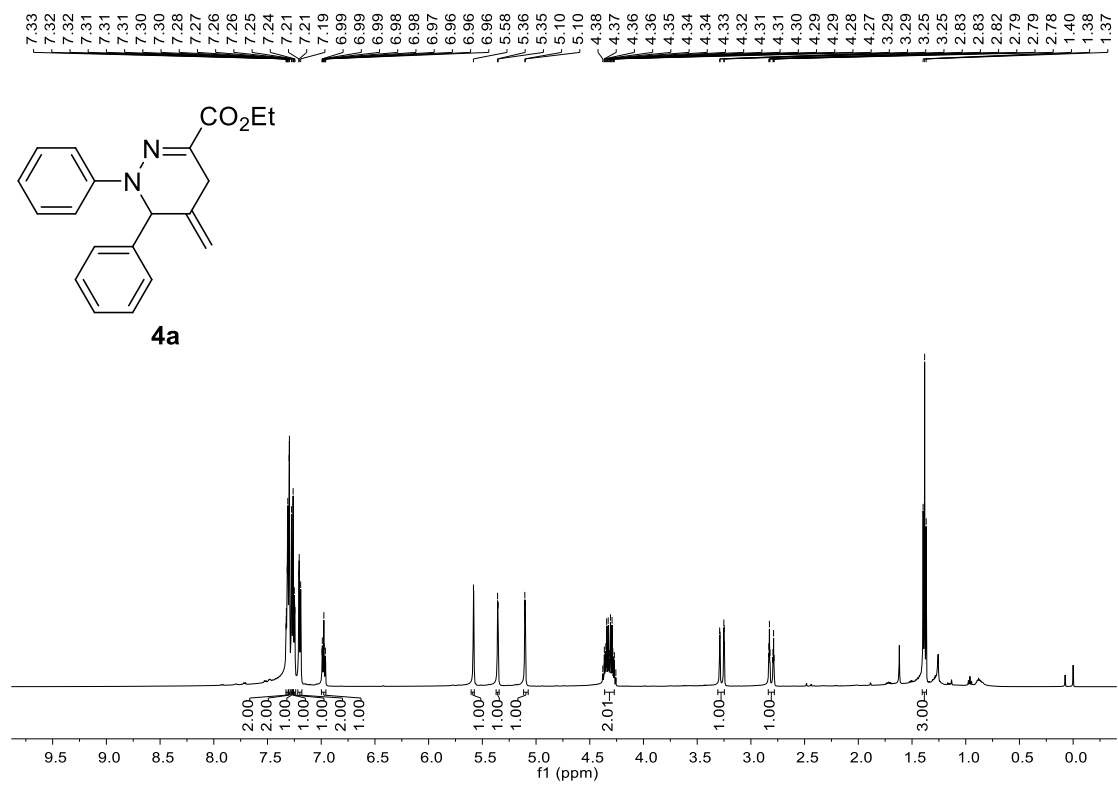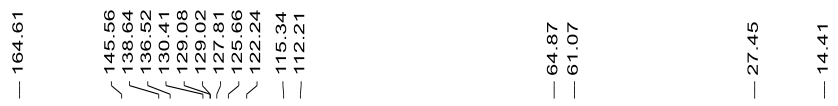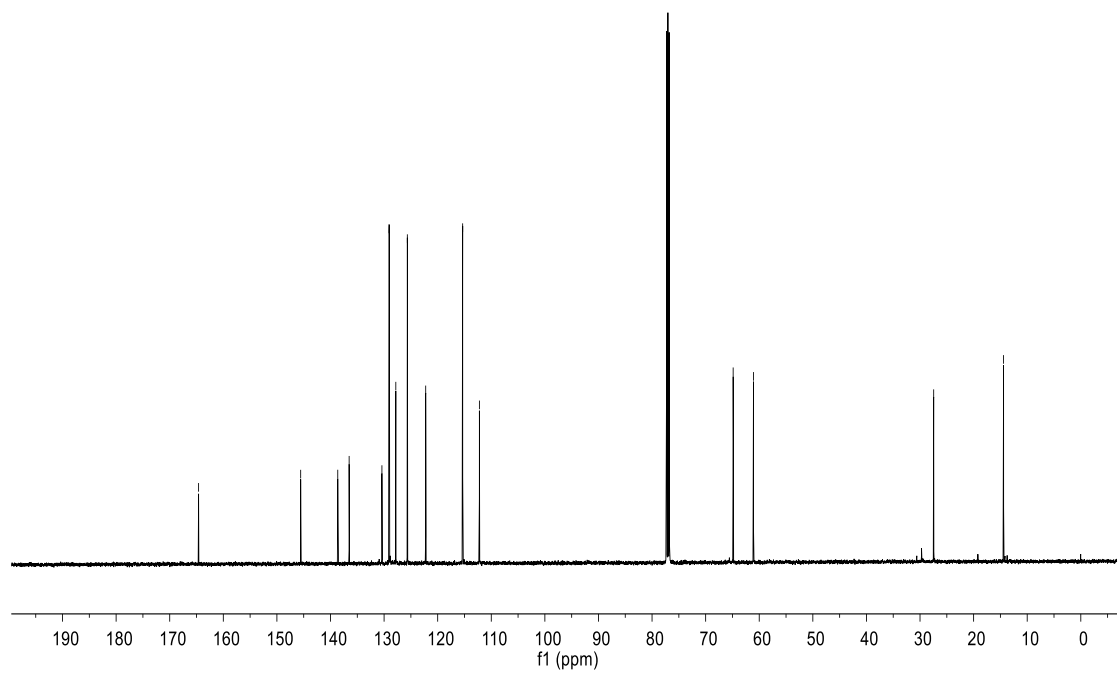

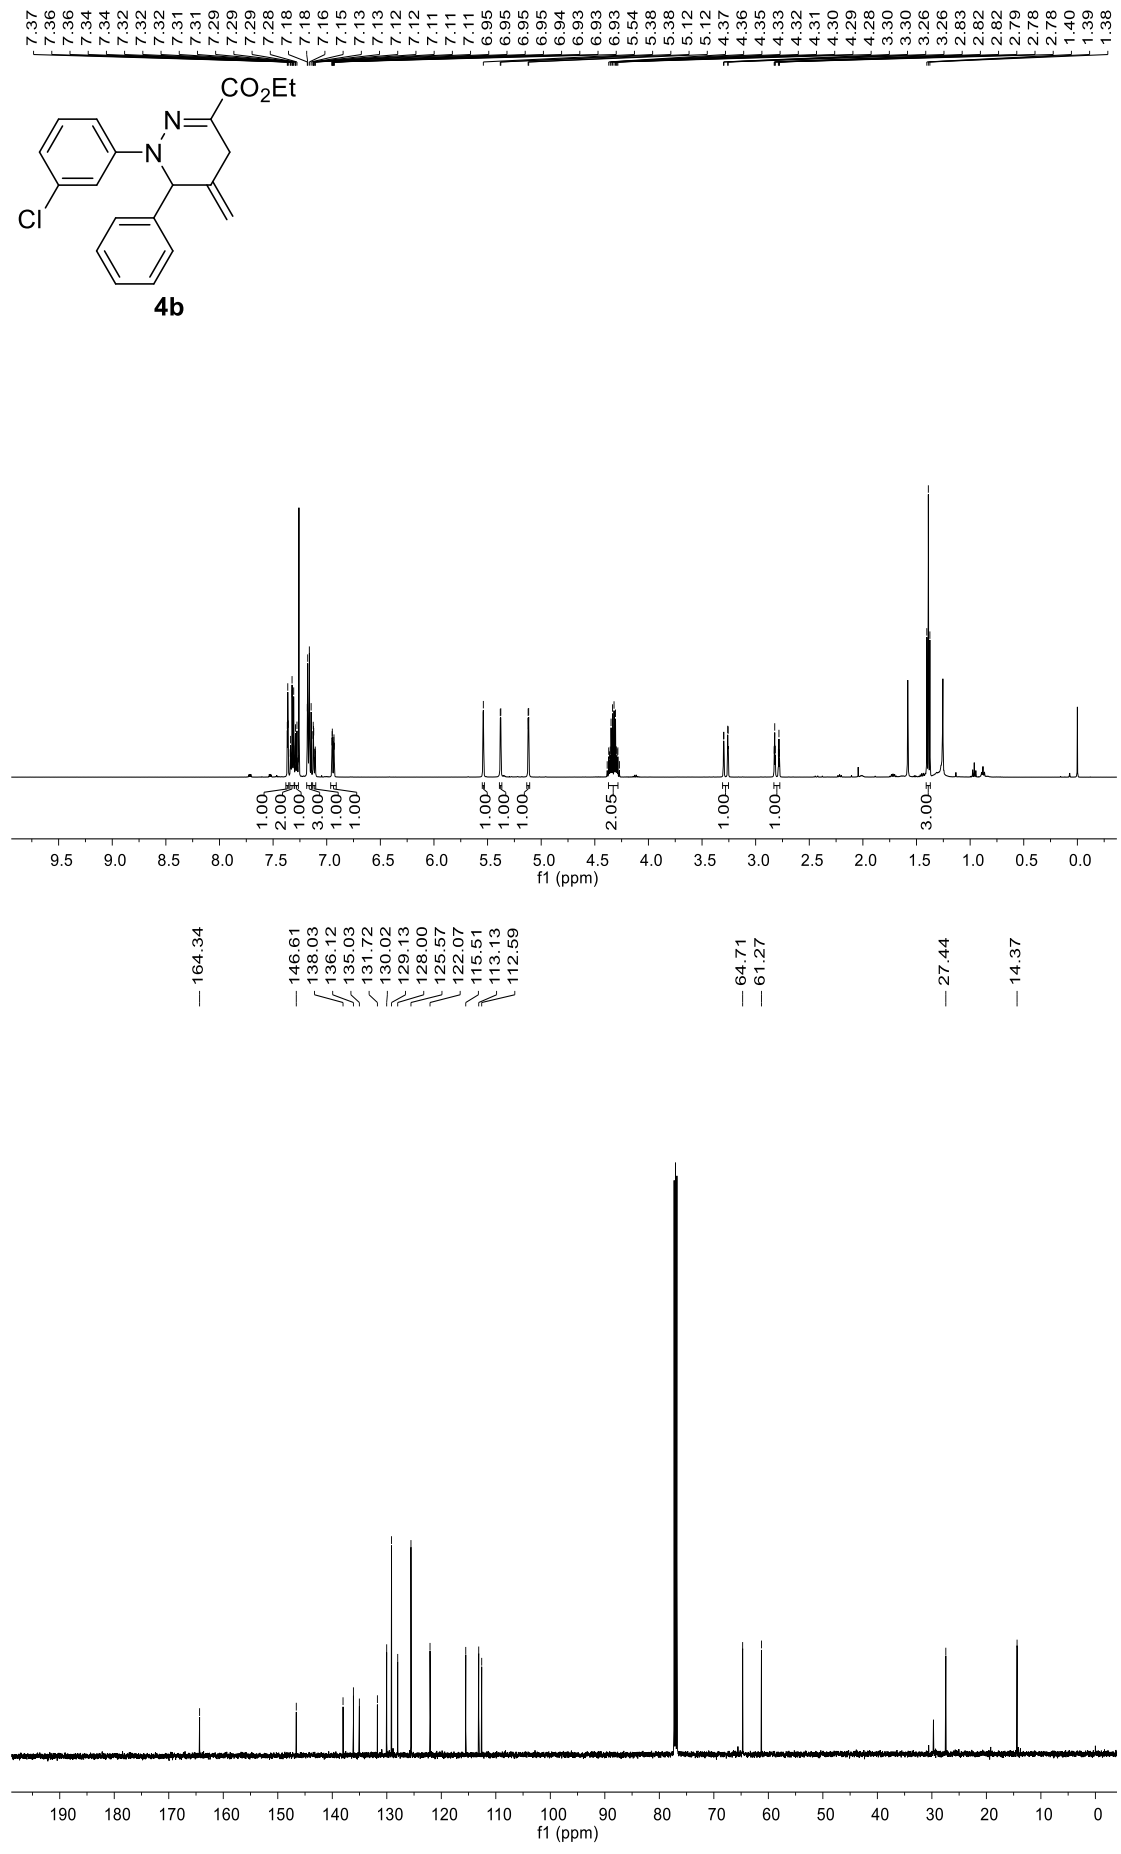

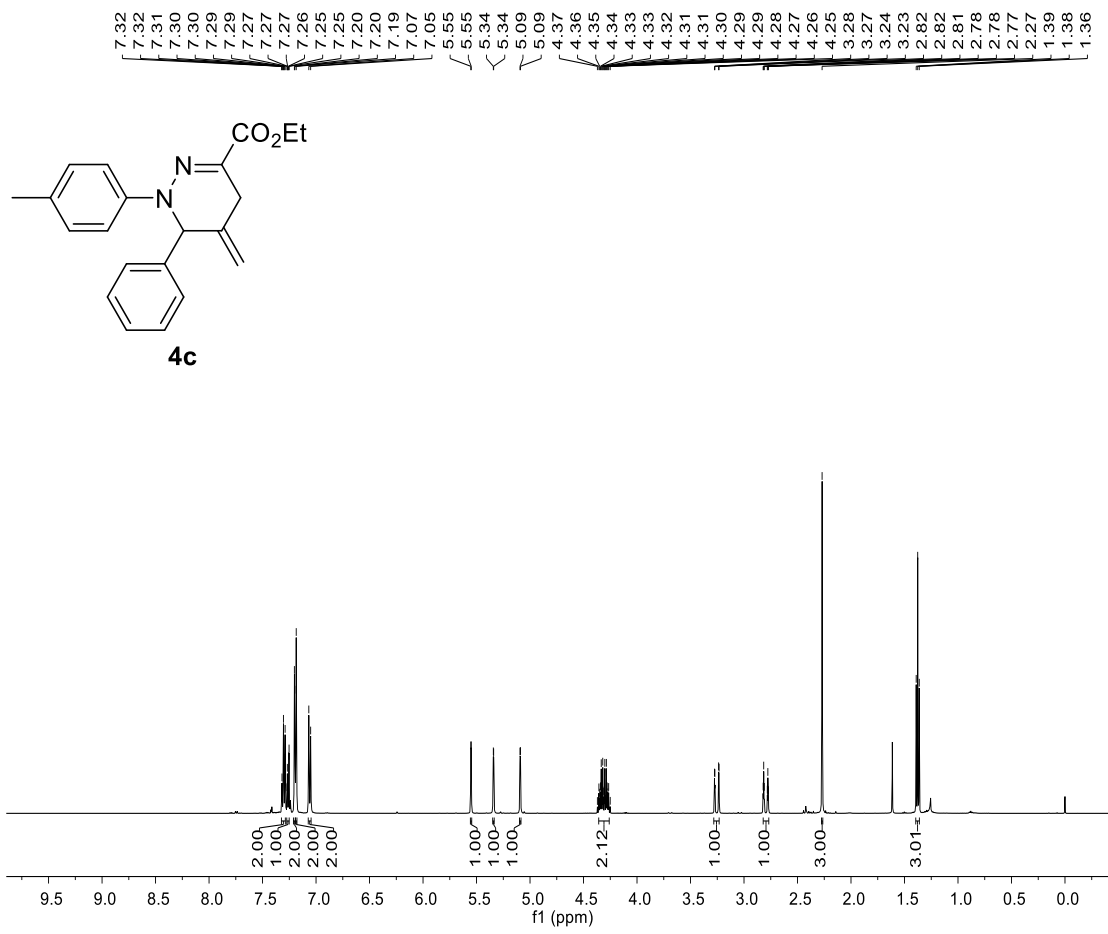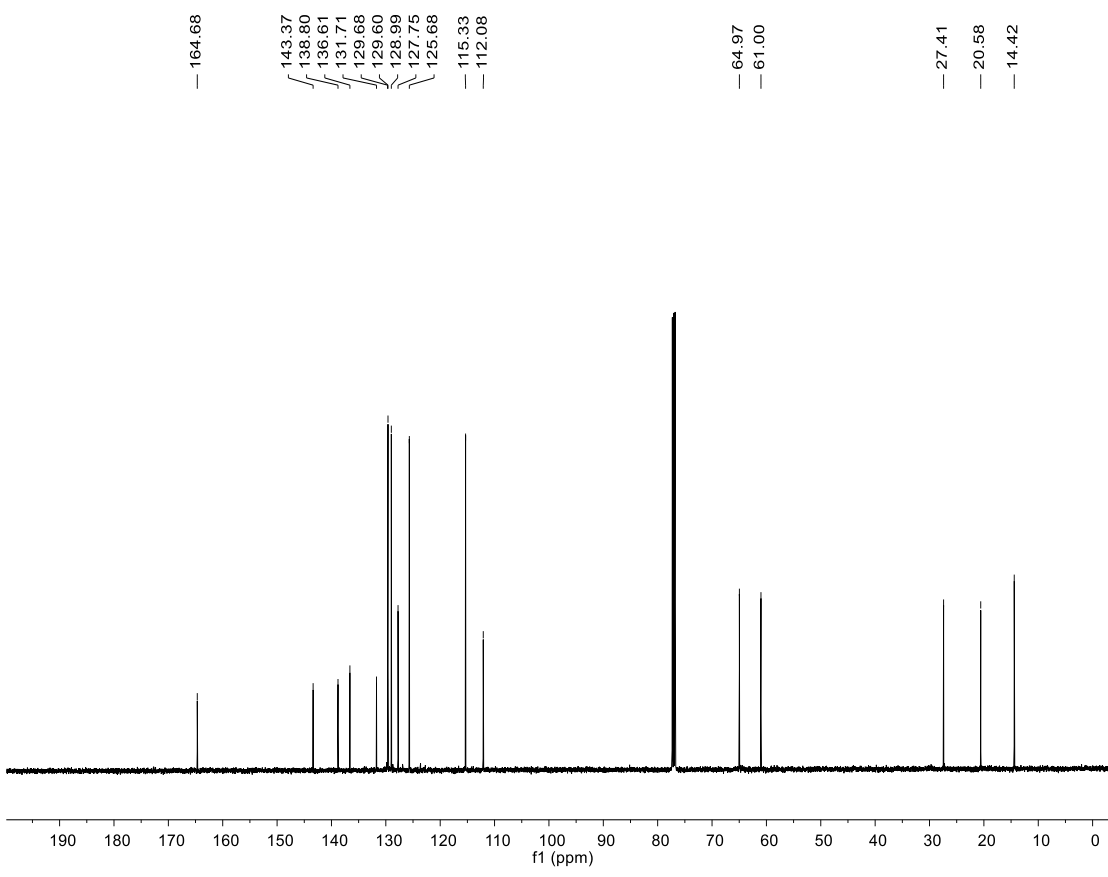

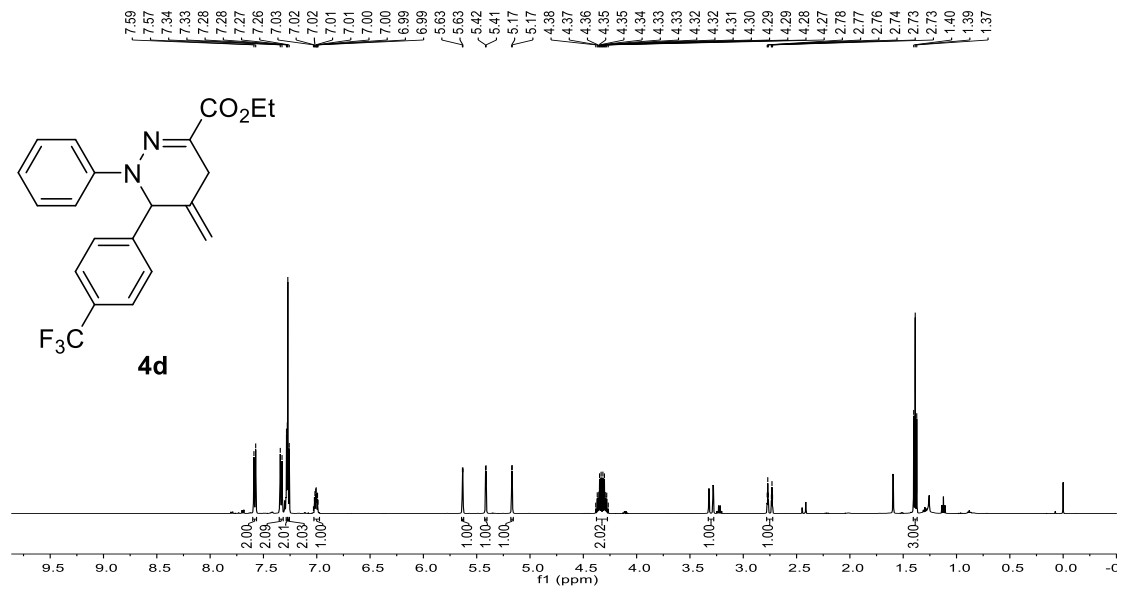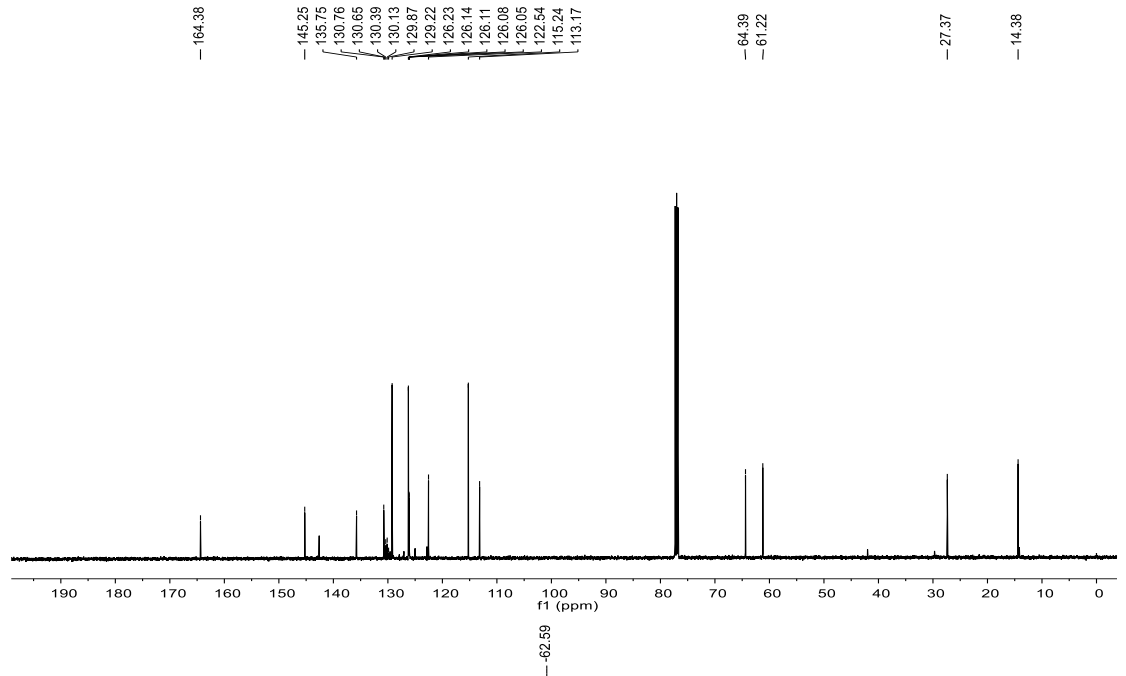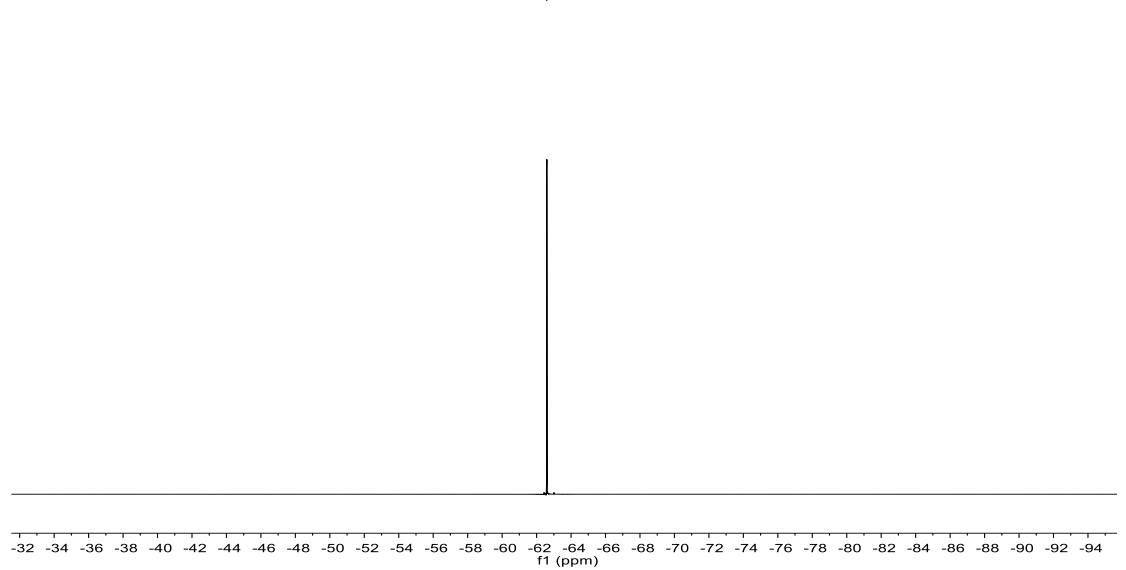

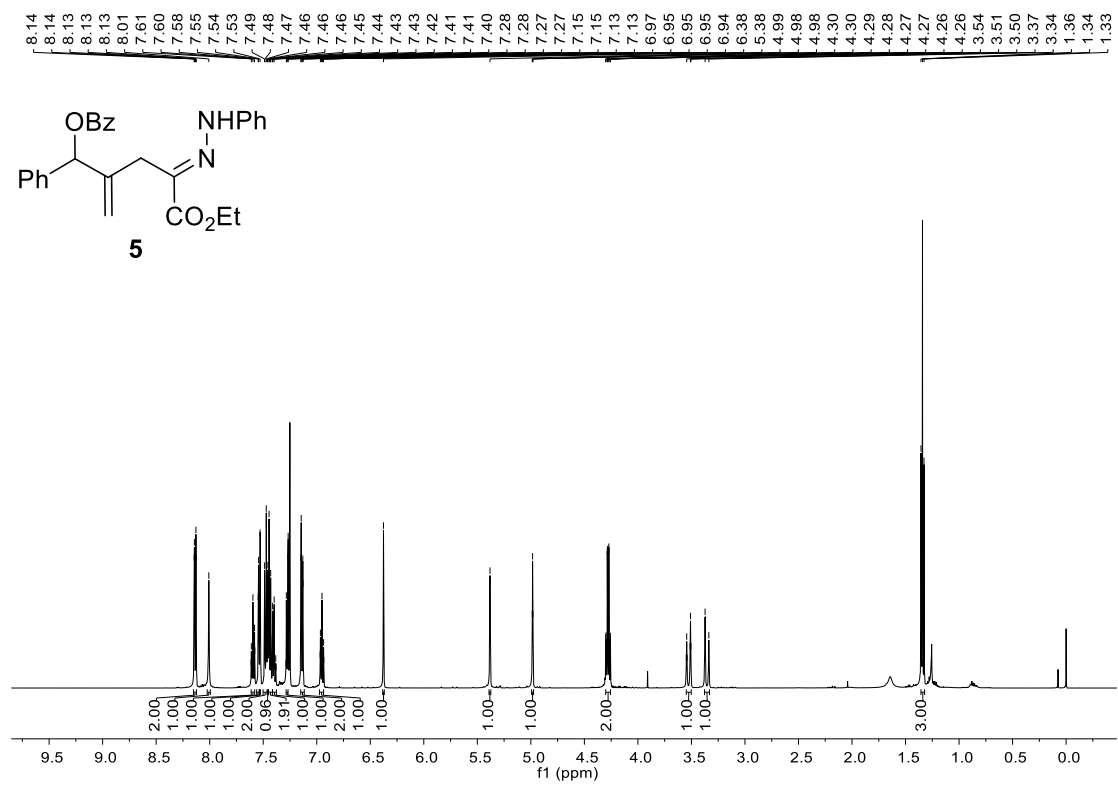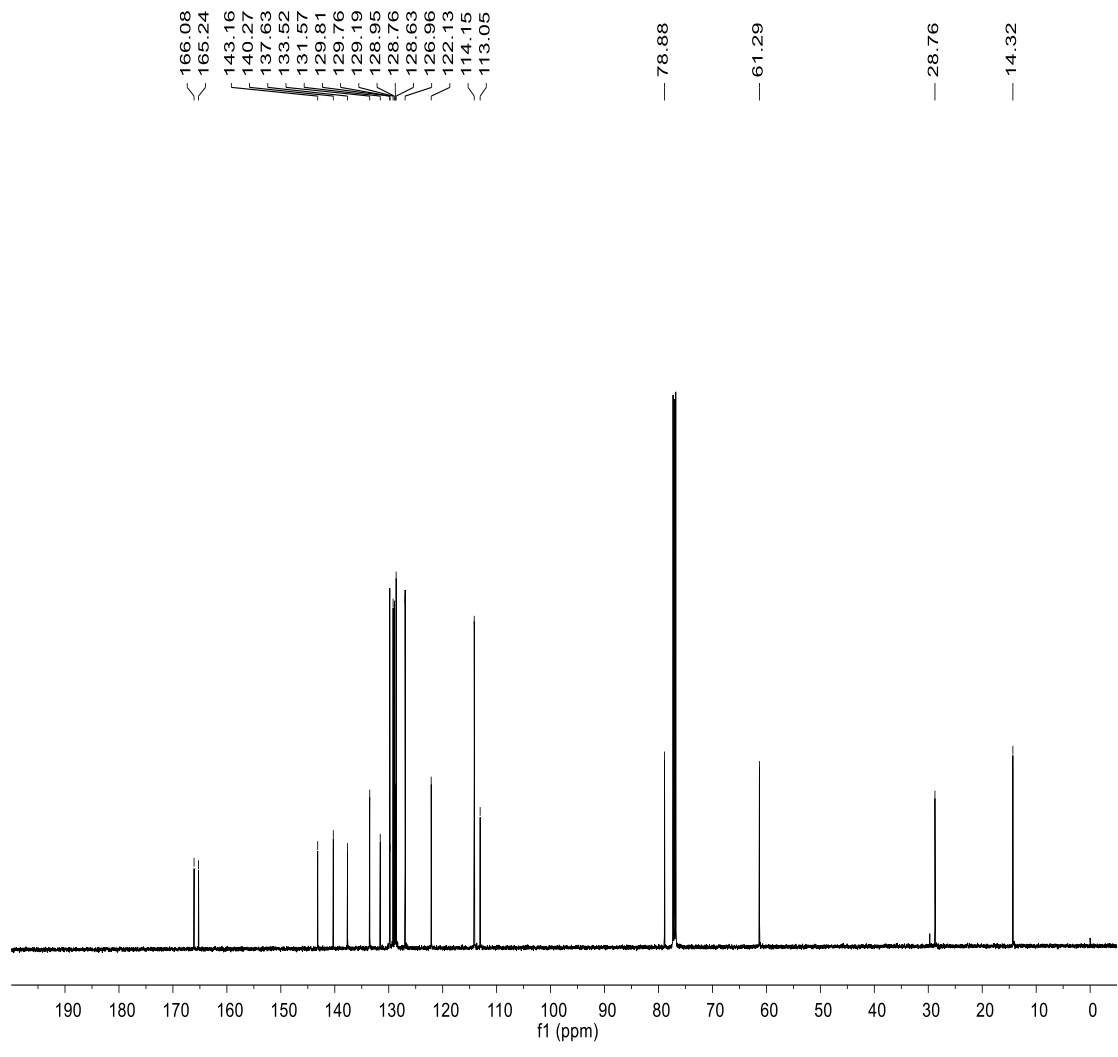



7.35  
7.35  
7.35  
7.34  
7.34  
7.33  
7.28  
7.27  
7.26  
7.25  
7.25  
7.24  
7.23  
7.23  
7.22  
7.22  
7.21  
7.21  
7.20  
7.20  
7.20  
7.18  
7.17  
7.17  
7.16  
7.15  
7.15  
7.01  
7.00  
6.99  
6.99  
6.98  
6.74  
6.34  
6.31  
6.09  
6.06  
4.57  
4.56  
4.56  
4.56  
4.23  
4.22  
4.20  
4.19  
1.27  
1.26  
1.25

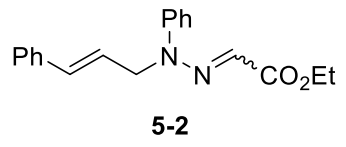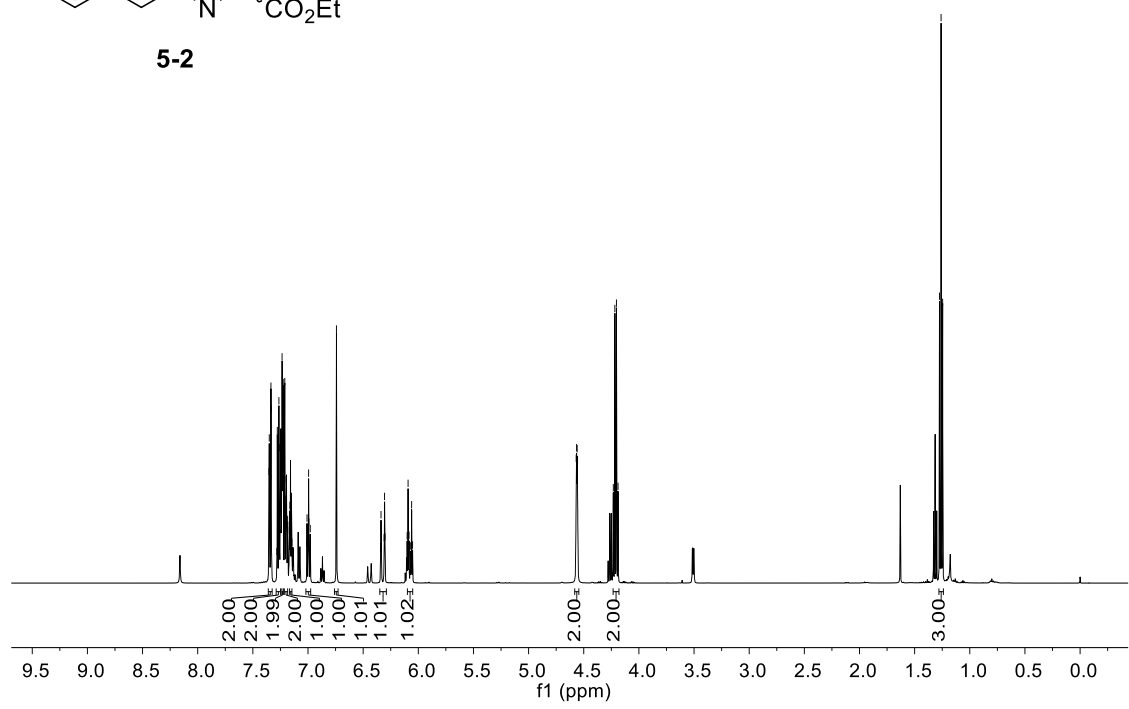

164.78  
146.39  
135.95  
132.14  
129.28  
128.67  
128.05  
126.49  
123.46  
121.83  
119.60  
116.92  
114.13  
60.74  
49.85  
14.40

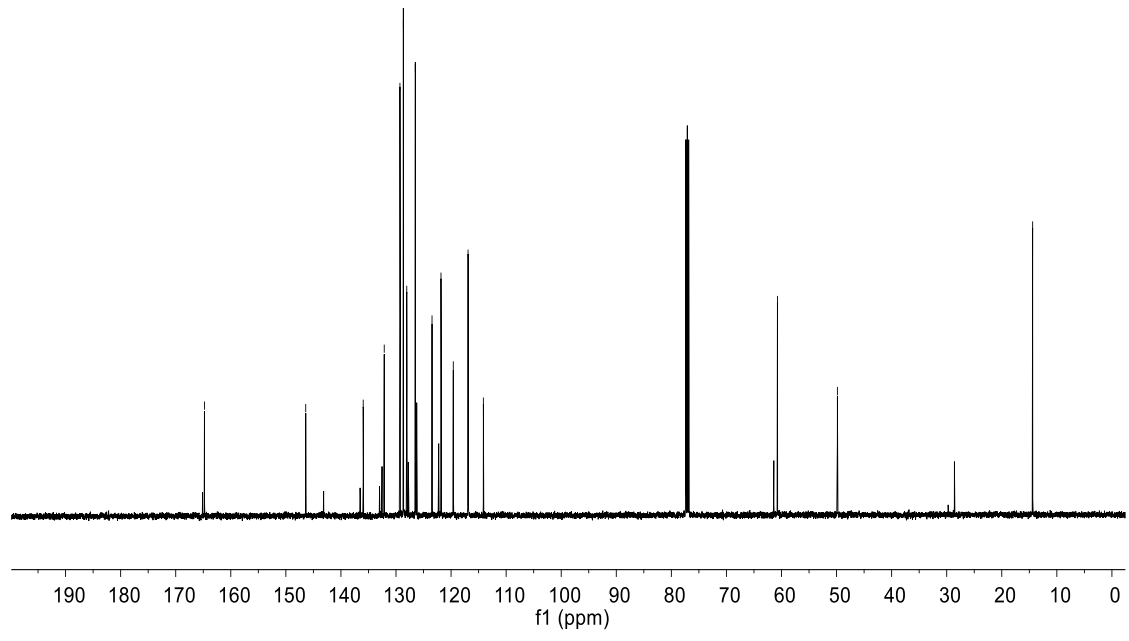

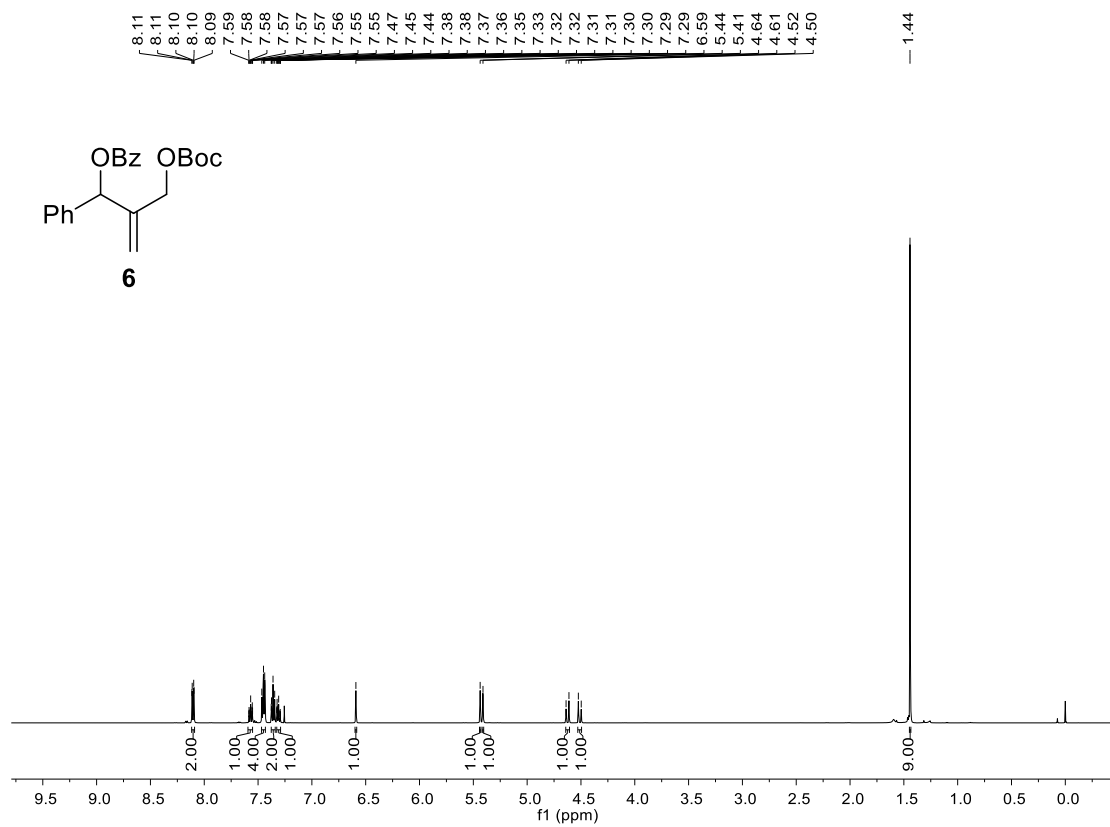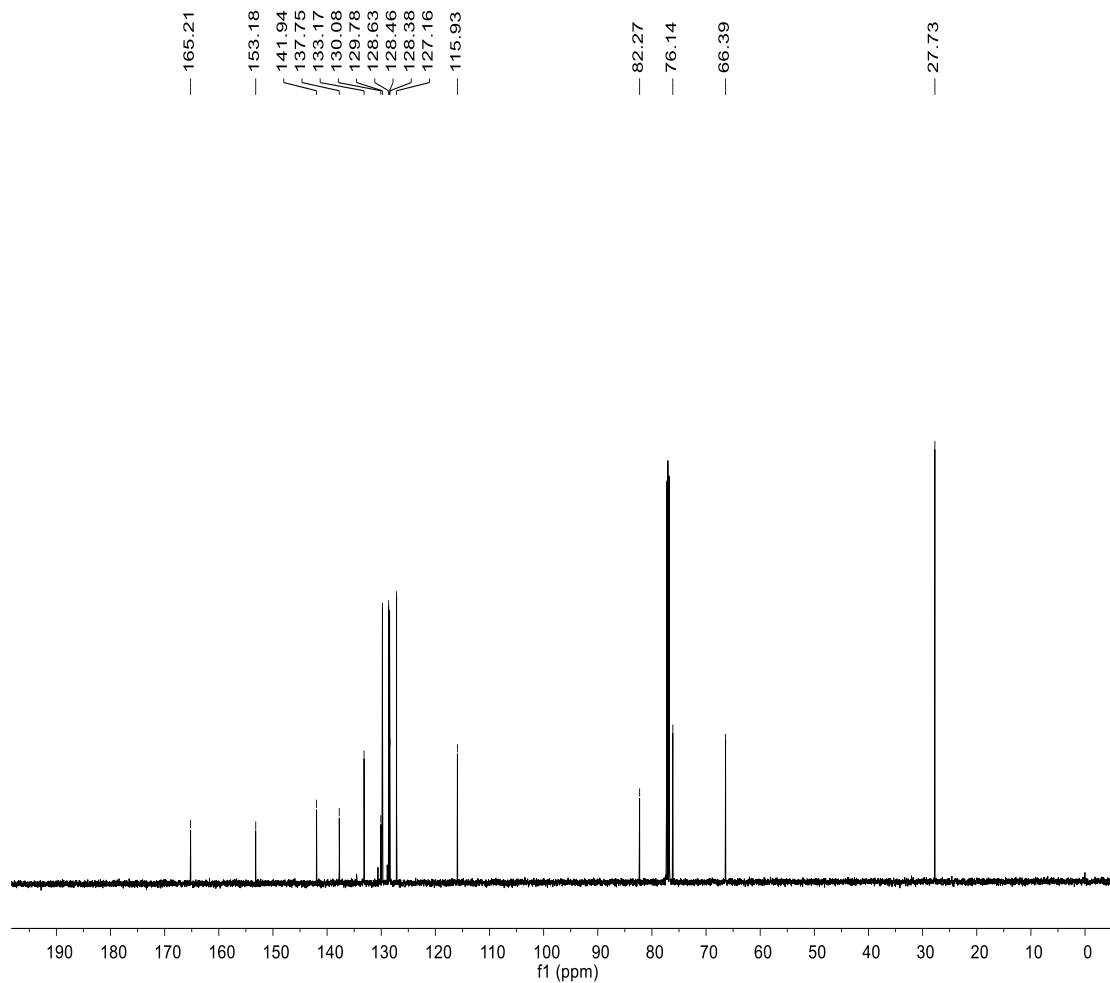

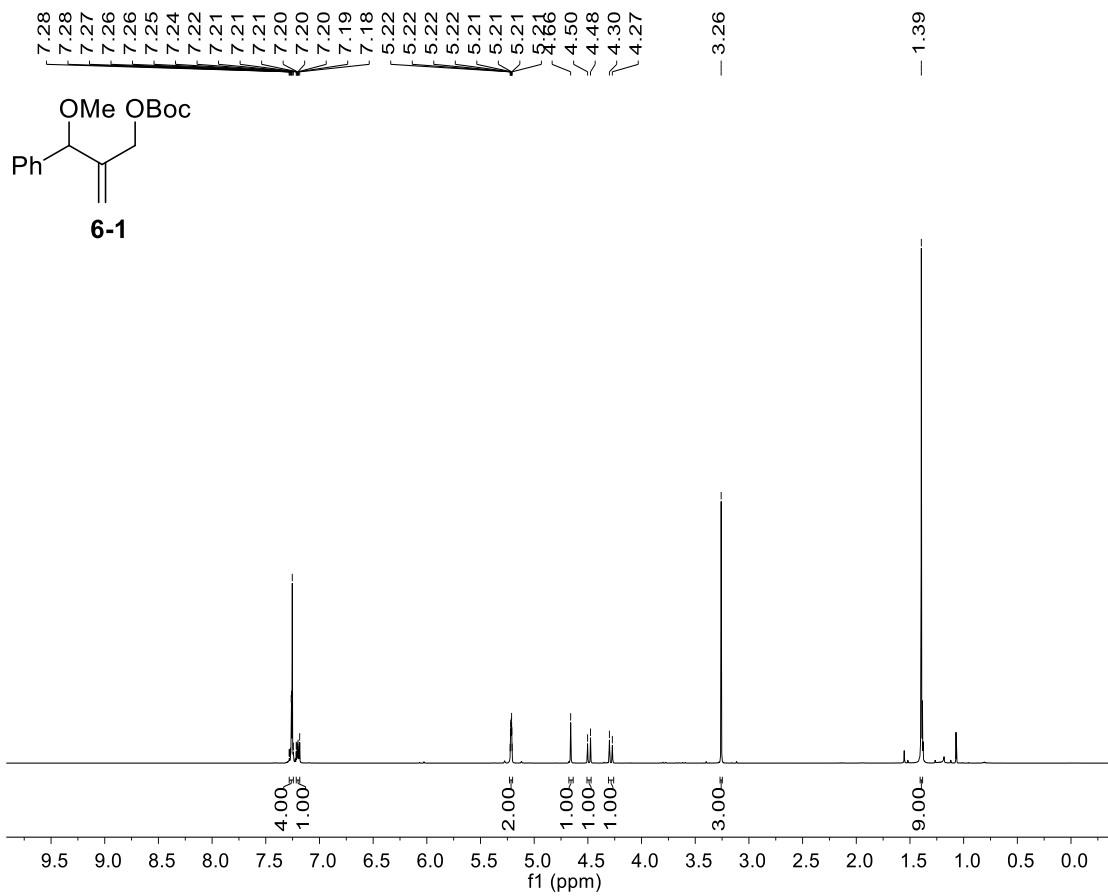

Chemical shifts (ppm): 153.29, 143.57, 139.39, 128.40, 127.82, 126.93, 114.39, 84.08, 82.08, 66.21, 56.83, 27.77.

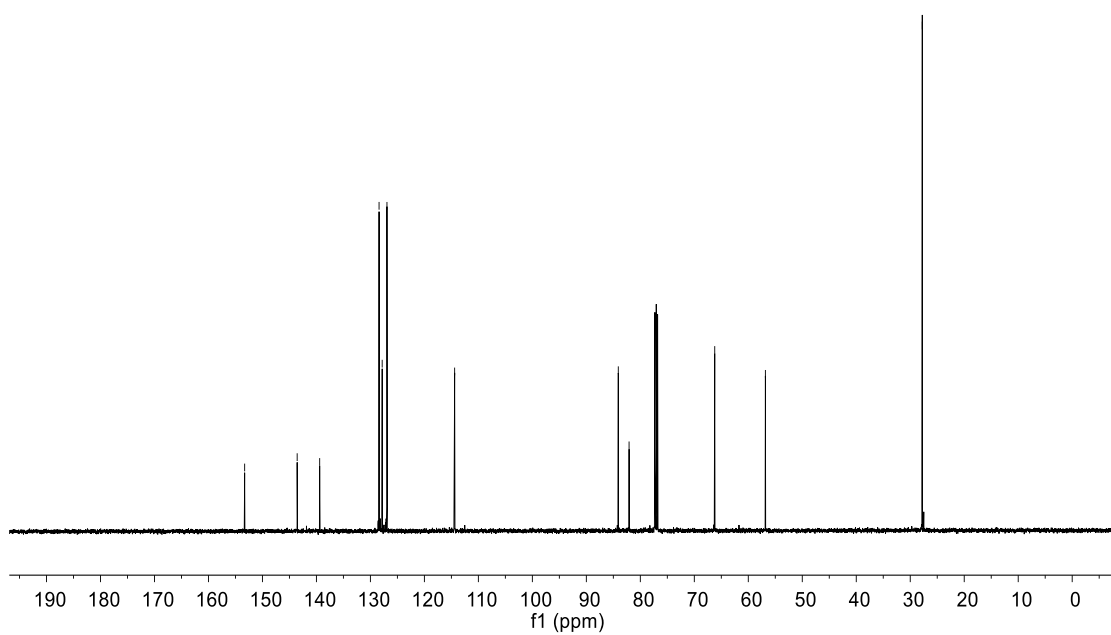

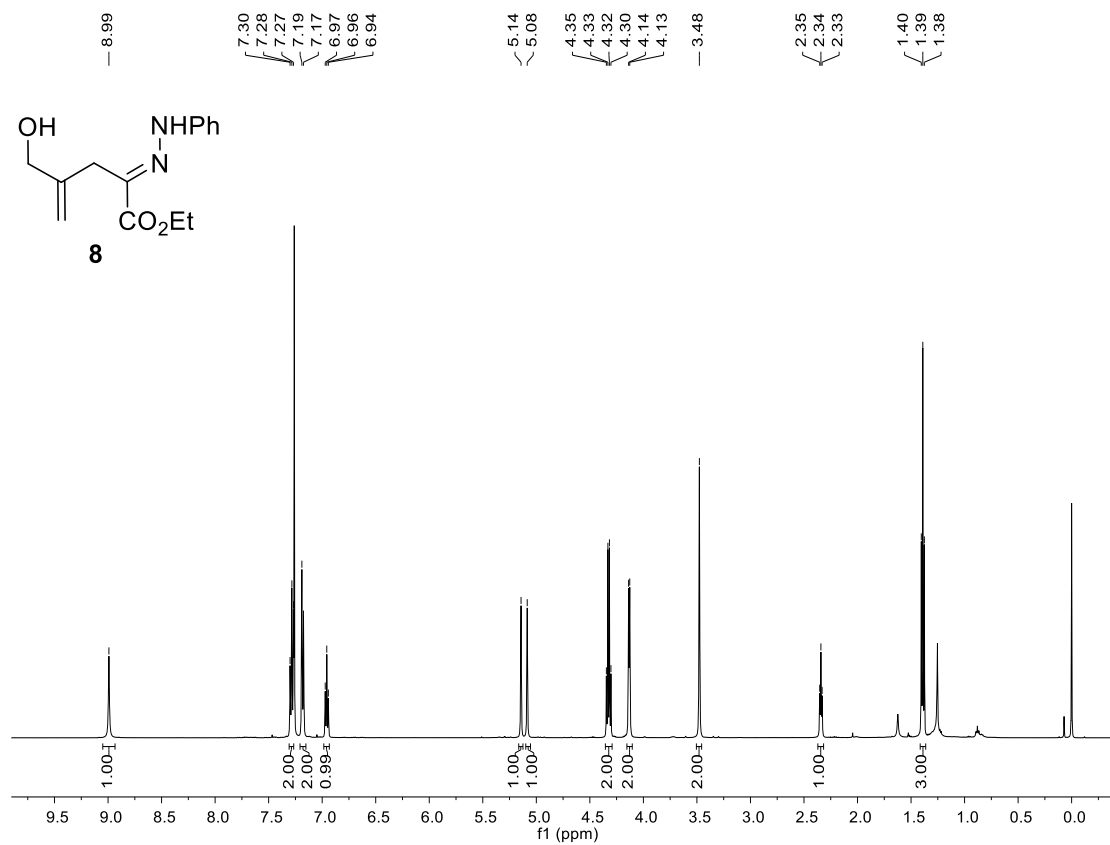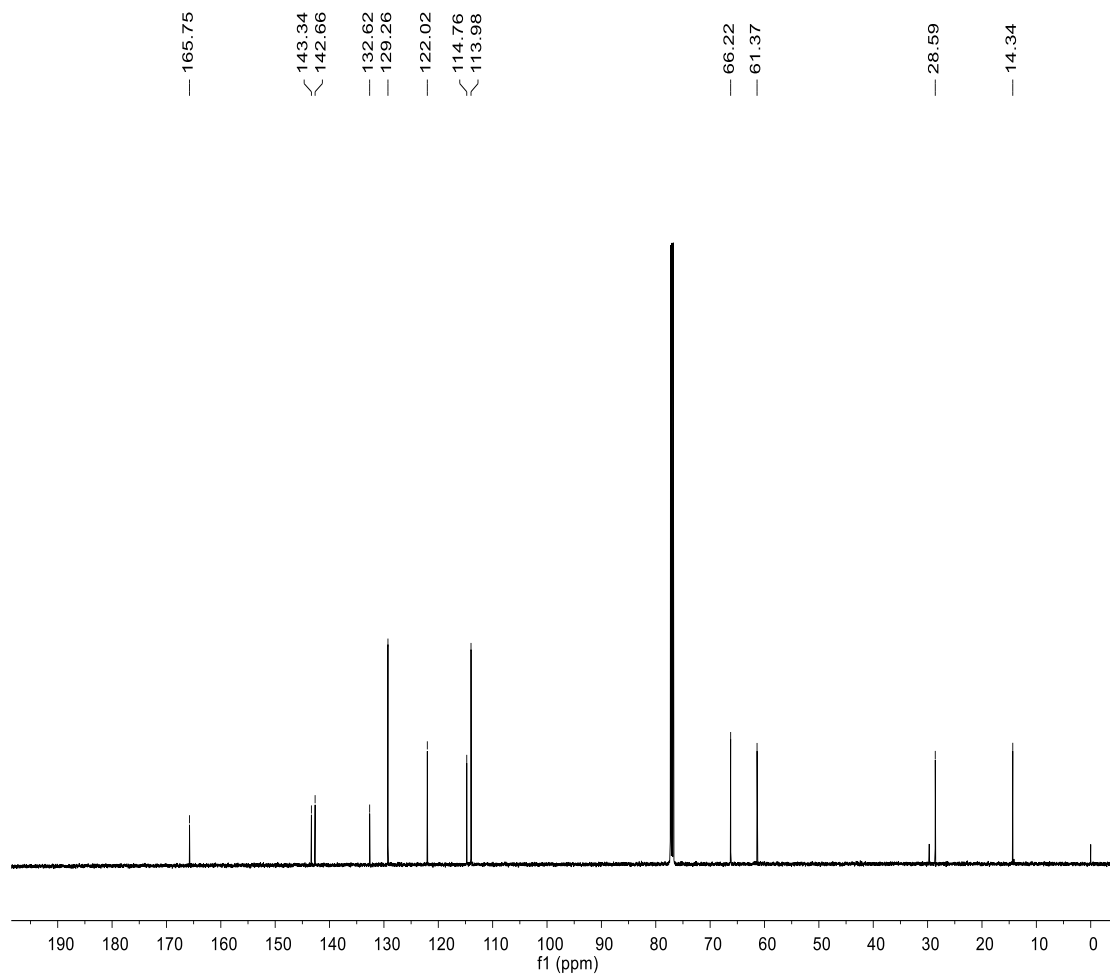

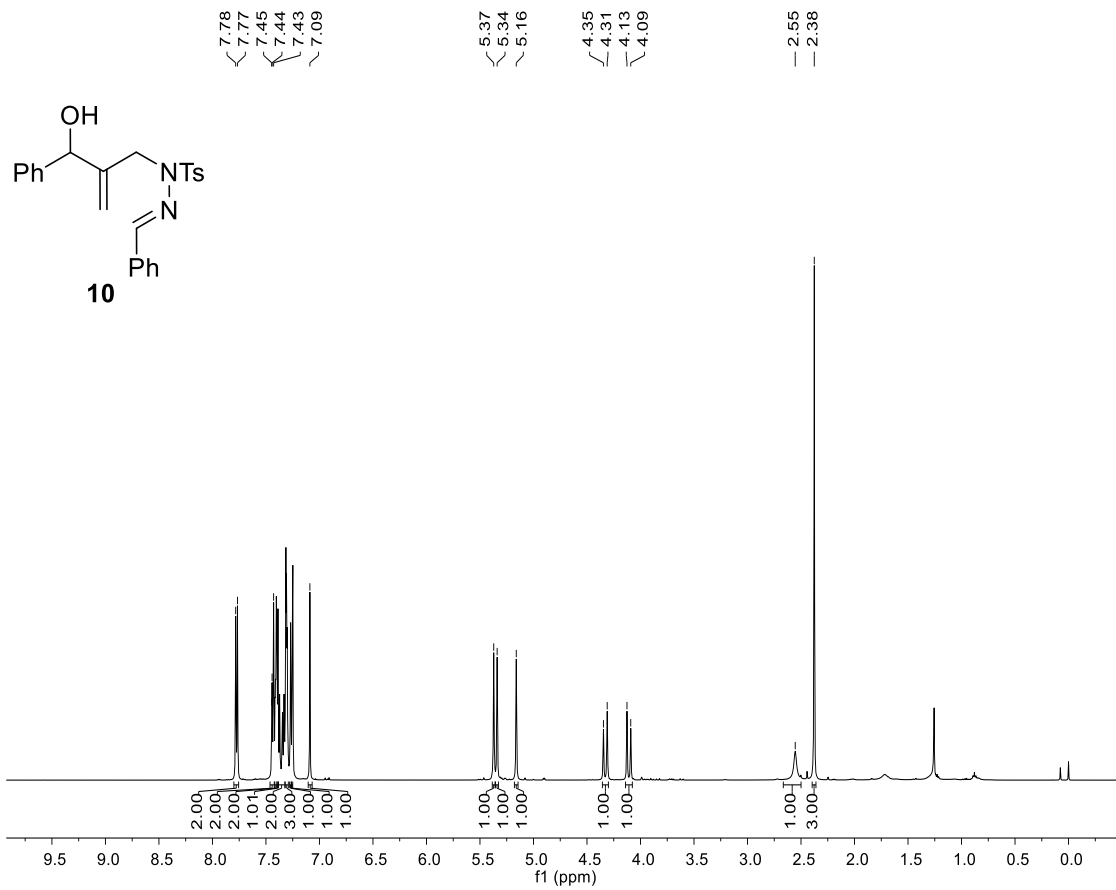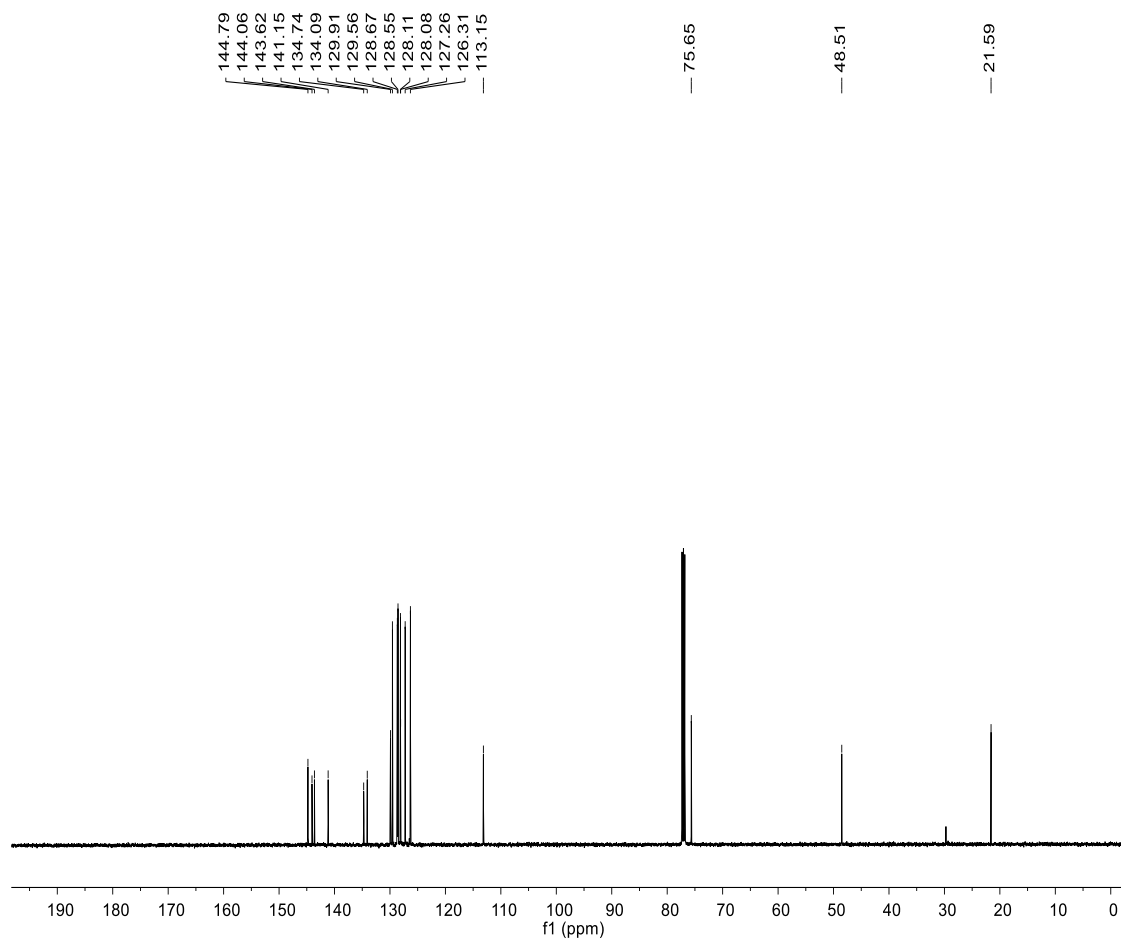

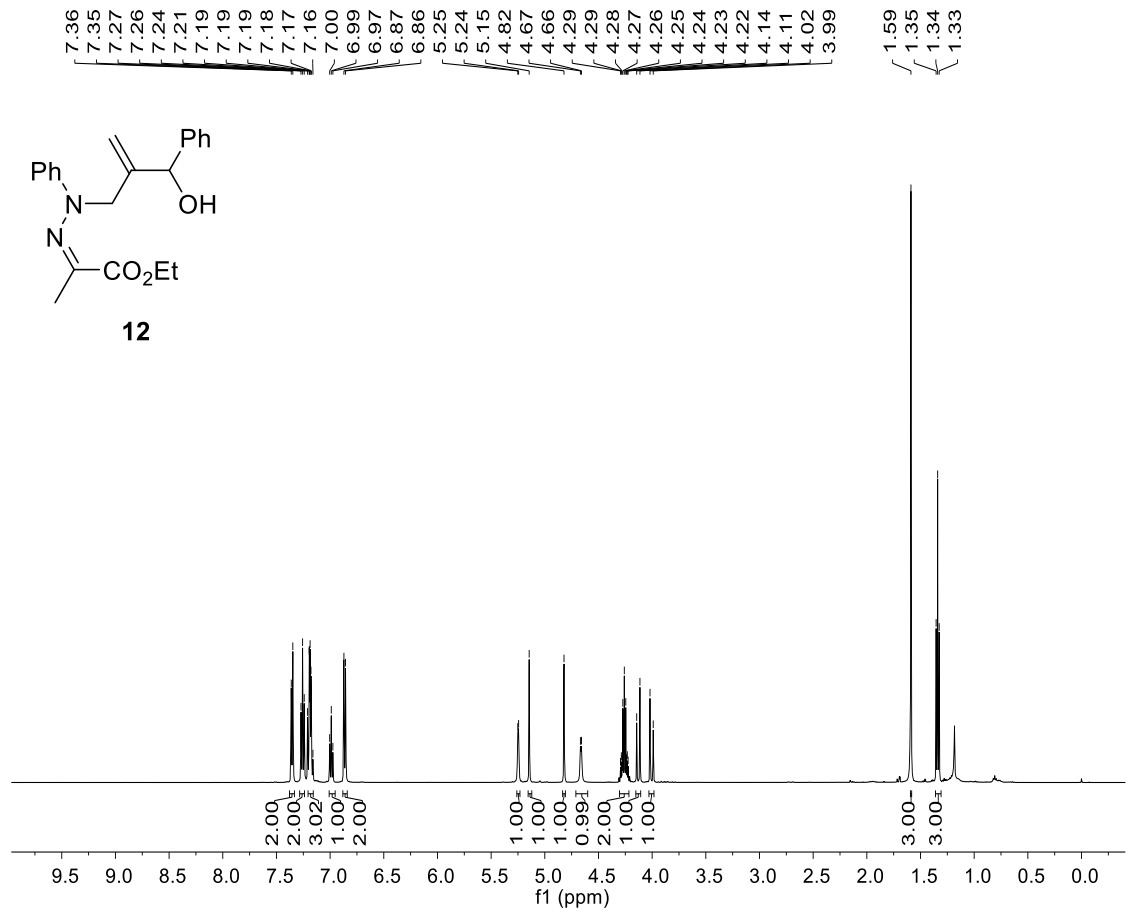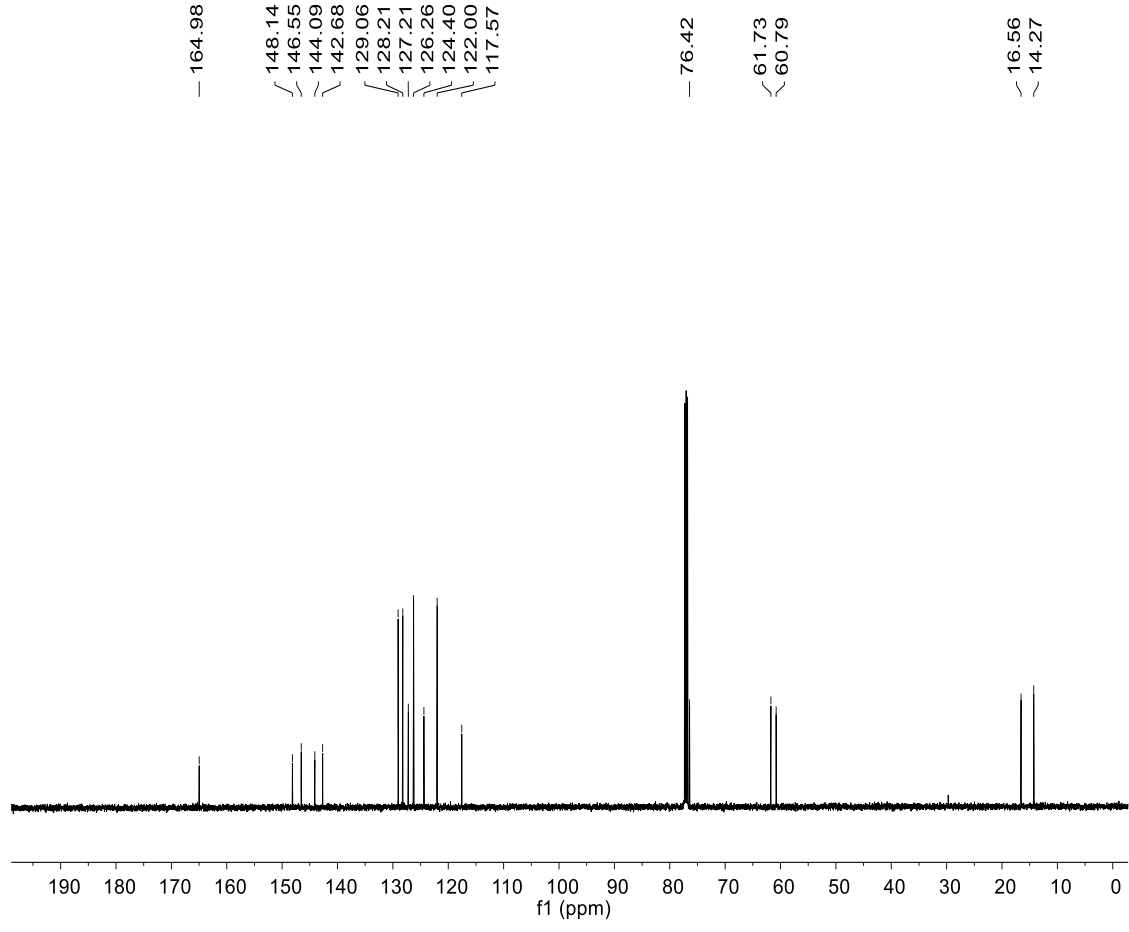

## X-Ray Crystallographic Data of **3aq** and **4a**

Crystallographic data for **3aq** have been deposited with the Cambridge Crystallographic Data Centre as deposition number 2183433. These data can be obtained free of charge via [www.ccdc.cam.ac.uk/data\\_request/cif](http://www.ccdc.cam.ac.uk/data_request/cif), or by emailing [data\\_request@ccdc.cam.ac.uk](mailto:data_request@ccdc.cam.ac.uk), or by contacting The Cambridge Crystallographic Data Centre, 12, Union Road, Cambridge CB2 1EZ, UK; fax: +44 1223 336033.

Single crystals of **3aq** were obtained by slow evaporation of a solution containing **3aq** in the mixture of petroleum ether and ethyl acetate at room temperature. A suitable crystal was selected and the crystal data and structure refinement results for compound **3aq** are listed in the Table S1.

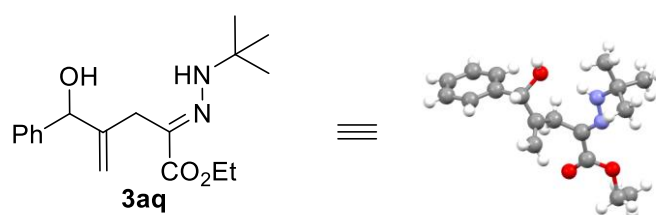

**Table S1 Crystal data and structure refinement for **3aq**.**

|                                    |                                                               |
|------------------------------------|---------------------------------------------------------------|
| Identification code                | <b>3aq</b>                                                    |
| Empirical formula                  | C <sub>18</sub> H <sub>26</sub> N <sub>2</sub> O <sub>3</sub> |
| Formula weight                     | 318.41                                                        |
| Temperature/K                      | 298.00                                                        |
| Crystal system                     | orthorhombic                                                  |
| Space group                        | P212121                                                       |
| a/Å                                | 6.9618(3)                                                     |
| b/Å                                | 14.6189(6)                                                    |
| c/Å                                | 18.3457(7)                                                    |
| α/°                                | 90                                                            |
| β/°                                | 90                                                            |
| γ/°                                | 90                                                            |
| Volume/Å <sup>3</sup>              | 1867.11(13)                                                   |
| Z                                  | 4                                                             |
| ρ <sub>calc</sub> /cm <sup>3</sup> | 1.133                                                         |
| μ/mm <sup>-1</sup>                 | 0.077                                                         |
| F(000)                             | 688.0                                                         |
| Crystal size/mm <sup>3</sup>       | 0.2 × 0.02 × 0.01                                             |
| Radiation                          | MoKα (λ = 0.71073)                                            |
| 2θ range for data collection/°     | 3.562 to 54.948                                               |
| Index ranges                       | -8 ≤ h ≤ 8, -18 ≤ k ≤ 18, -22 ≤ l ≤ 23                        |
| Reflections collected              | 17434                                                         |

|                                             |                                       |
|---------------------------------------------|---------------------------------------|
| Independent reflections                     | 4150 [Rint = 0.0524, Rsigma = 0.0433] |
| Data/restraints/parameters                  | 4150/156/214                          |
| Goodness-of-fit on F2                       | 1.101                                 |
| Final R indexes [ $I \geq 2\sigma(I)$ ]     | R1 = 0.0954, wR2 = 0.2786             |
| Final R indexes [all data]                  | R1 = 0.1082, wR2 = 0.2936             |
| Largest diff. peak/hole / e Å <sup>-3</sup> | 0.68/-0.60                            |
| Flack parameter                             | -1(4)                                 |

Crystallographic data for **4a** have been deposited with the Cambridge Crystallographic Data Centre as deposition number 2183504. These data can be obtained free of charge via [www.ccdc.cam.ac.uk/data\\_request/cif](http://www.ccdc.cam.ac.uk/data_request/cif), or by emailing [data\\_request@ccdc.cam.ac.uk](mailto:data_request@ccdc.cam.ac.uk), or by contacting The Cambridge Crystallographic Data Centre, 12, Union Road, Cambridge CB2 1EZ, UK; fax: +44 1223 336033.

Single crystals of **4a** were obtained by slow evaporation of a solution containing **4a** in the mixture of petroleum ether and ethyl acetate at room temperature. A suitable crystal was selected and the crystal data and structure refinement results for compound **4a** are listed in the Table S2.

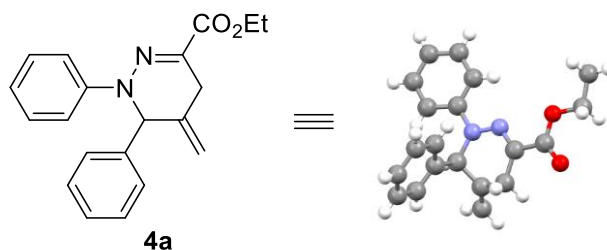

**Table S2 Crystal data and structure refinement for 4a.**

|                     |                                                               |
|---------------------|---------------------------------------------------------------|
| Identification code | <b>4a</b>                                                     |
| Empirical formula   | C <sub>20</sub> H <sub>20</sub> N <sub>2</sub> O <sub>2</sub> |
| Formula weight      | 320.38                                                        |
| Temperature/K       | 200.00                                                        |
| Crystal system      | monoclinic                                                    |
| Space group         | P21/n                                                         |
| a/Å                 | 8.1524(2)                                                     |
| b/Å                 | 14.0253(4)                                                    |
| c/Å                 | 15.1337(4)                                                    |
| α/°                 | 90                                                            |
| β/°                 | 102.5470(10)                                                  |
| γ/°                 | 90                                                            |



|                                             |                                                               |
|---------------------------------------------|---------------------------------------------------------------|
| Volume/Å <sup>3</sup>                       | 1689.06(8)                                                    |
| Z                                           | 4                                                             |
| ρ <sub>calc</sub> /cm <sup>3</sup>          | 1.260                                                         |
| μ/mm <sup>-1</sup>                          | 0.082                                                         |
| F(000)                                      | 680.0                                                         |
| Crystal size/mm <sup>3</sup>                | 0.2 × 0.16 × 0.12                                             |
| Radiation                                   | MoKα (λ = 0.71073)                                            |
| 2θ range for data collection/°              | 4.004 to 55                                                   |
| Index ranges                                | -10 ≤ h ≤ 10, -18 ≤ k ≤ 18, -15 ≤ l ≤ 19                      |
| Reflections collected                       | 17254                                                         |
| Independent reflections                     | 3838 [R <sub>int</sub> = 0.0358, R <sub>sigma</sub> = 0.0293] |
| Data/restraints/parameters                  | 3838/0/218                                                    |
| Goodness-of-fit on F <sup>2</sup>           | 1.027                                                         |
| Final R indexes [I ≥ 2σ (I)]                | R <sub>1</sub> = 0.0388, wR <sub>2</sub> = 0.0976             |
| Final R indexes [all data]                  | R <sub>1</sub> = 0.0486, wR <sub>2</sub> = 0.1039             |
| Largest diff. peak/hole / e Å <sup>-3</sup> | 0.19/-0.16                                                    |
